# Supplementary material for: Cohort profile: Actionable Register of Geneva Outpatients and inpatients with SARS-CoV-2 (ARGOS)
Source: PubMed Central journal article supplement — BMJ Open. 2021 Nov 30;11(11):e048946. doi: 10.1136/bmjopen-2021-048946 (PMC8634627; doi:10.1136/bmjopen-2021-048946), 2021-11-30
Supplement: bmjopen-2021-048946.draft_revisions.pdf [file bmjopen-2021-048946.draft_revisions.pdf]

# BMJ Open

BMJ Open is committed to open peer review. As part of this commitment we make the peer review history of every article we publish publicly available.

When an article is published we post the peer reviewers' comments and the authors' responses online. We also post the versions of the paper that were used during peer review. These are the versions that the peer review comments apply to.

The versions of the paper that follow are the versions that were submitted during the peer review process. They are not the versions of record or the final published versions. They should not be cited or distributed as the published version of this manuscript.

BMJ Open is an open access journal and the full, final, typeset and author-corrected version of record of the manuscript is available on our site with no access controls, subscription charges or pay-per-view fees (<http://bmjopen.bmj.com>).

If you have any questions on BMJ Open's open peer review process please email [info.bmjopen@bmj.com](mailto:info.bmjopen@bmj.com)

# BMJ Open

## Cohort profile: Actionable Register of Geneva Outpatients with SARS-CoV-2

|                               |                                                                                                                                                                                                                                                                                                                                                                                                                                                                                                                                                                                                                                                                                                                                                                                                                                                                                                                                                                                                                                                                                                                                                                                                                                                                                                                                                                                                                                                                                                                                                                                                                                                                                                   |
|-------------------------------|---------------------------------------------------------------------------------------------------------------------------------------------------------------------------------------------------------------------------------------------------------------------------------------------------------------------------------------------------------------------------------------------------------------------------------------------------------------------------------------------------------------------------------------------------------------------------------------------------------------------------------------------------------------------------------------------------------------------------------------------------------------------------------------------------------------------------------------------------------------------------------------------------------------------------------------------------------------------------------------------------------------------------------------------------------------------------------------------------------------------------------------------------------------------------------------------------------------------------------------------------------------------------------------------------------------------------------------------------------------------------------------------------------------------------------------------------------------------------------------------------------------------------------------------------------------------------------------------------------------------------------------------------------------------------------------------------|
| Journal:                      | <i>BMJ Open</i>                                                                                                                                                                                                                                                                                                                                                                                                                                                                                                                                                                                                                                                                                                                                                                                                                                                                                                                                                                                                                                                                                                                                                                                                                                                                                                                                                                                                                                                                                                                                                                                                                                                                                   |
| Manuscript ID                 | bmjopen-2021-048946                                                                                                                                                                                                                                                                                                                                                                                                                                                                                                                                                                                                                                                                                                                                                                                                                                                                                                                                                                                                                                                                                                                                                                                                                                                                                                                                                                                                                                                                                                                                                                                                                                                                               |
| Article Type:                 | Cohort profile                                                                                                                                                                                                                                                                                                                                                                                                                                                                                                                                                                                                                                                                                                                                                                                                                                                                                                                                                                                                                                                                                                                                                                                                                                                                                                                                                                                                                                                                                                                                                                                                                                                                                    |
| Date Submitted by the Author: | 11-Jan-2021                                                                                                                                                                                                                                                                                                                                                                                                                                                                                                                                                                                                                                                                                                                                                                                                                                                                                                                                                                                                                                                                                                                                                                                                                                                                                                                                                                                                                                                                                                                                                                                                                                                                                       |
| Complete List of Authors:     | <p>Genecand, Camille; Republic and Canton of Geneva Directorate of Health, Division of General Surgeon; University Hospitals of Geneva Department of Community Medicine and First Aid and Emergencies, Division of Primary Care Medicine</p> <p>koegler, flora; Geneva University Hospital, Department of Internal Medicine</p> <p>Lebowitz, Dan; Geneva University Hospitals, Infection Control Program</p> <p>Mongin, Denis; Republic and Canton of Geneva Directorate of Health, Division of General Surgeon</p> <p>Regard, Simon; Geneva University Hospital, Department of Acute Medicine; Republic and Canton of Geneva Directorate of Health, Division of general Surgeon</p> <p>Nehme, Mayssam; Hôpitaux Universitaires de Genève, Primary Care Division</p> <p>Braillard , Olivia; de premier recours et des urgences</p> <p>Gira, Marwene; University Hospitals of Geneva Department of Community Medicine and First Aid and Emergencies, Division of Primary Care Medicine</p> <p>Joubert, Dominique ; Geneva University Hospitals, Quality of Care Service</p> <p>Chopard, Pierre; University Hospitals of Geneva, Quality of Care Service</p> <p>Delaporte, Elisabeth; Republic and Canton of Geneva Directorate of Health, division of general surgeon</p> <p>Stirnemann, Jerome; Geneva University Hospitals, Department of internal medicine</p> <p>Guessous, Idris; Geneva University Hospital, Department of Community Medicine and Primary Care and Emergency Medicine</p> <p>Tardin, Aglaé; Republic and Canton of Geneva Directorate of Health, Division of General Surgeon</p> <p>Courvoisier, Delphine; Geneva University Hospitals, Division of clinical epidemiology</p> |
| Keywords:                     | COVID-19, Public health < INFECTIOUS DISEASES, Epidemiology < INFECTIOUS DISEASES                                                                                                                                                                                                                                                                                                                                                                                                                                                                                                                                                                                                                                                                                                                                                                                                                                                                                                                                                                                                                                                                                                                                                                                                                                                                                                                                                                                                                                                                                                                                                                                                                 |
|                               |                                                                                                                                                                                                                                                                                                                                                                                                                                                                                                                                                                                                                                                                                                                                                                                                                                                                                                                                                                                                                                                                                                                                                                                                                                                                                                                                                                                                                                                                                                                                                                                                                                                                                                   |

1  
2  
3  
4  
5  
6  
7  
8  
9  
10  
11  
12  
13  
14  
15  
16  
17  
18  
19  
20  
21  
22  
23  
24  
25  
26  
27  
28  
29  
30  
31  
32  
33  
34  
35  
36  
37  
38  
39  
40  
41  
42  
43  
44  
45  
46  
47  
48  
49  
50  
51  
52  
53  
54  
55  
56  
57  
58  
59  
60

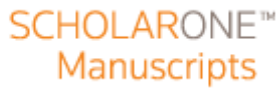

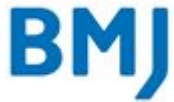

I, the Submitting Author has the right to grant and does grant on behalf of all authors of the Work (as defined in the below author licence), an exclusive licence and/or a non-exclusive licence for contributions from authors who are: i) UK Crown employees; ii) where BMJ has agreed a CC-BY licence shall apply, and/or iii) in accordance with the terms applicable for US Federal Government officers or employees acting as part of their official duties; on a worldwide, perpetual, irrevocable, royalty-free basis to BMJ Publishing Group Ltd ("BMJ") its licensees and where the relevant Journal is co-owned by BMJ to the co-owners of the Journal, to publish the Work in this journal and any other BMJ products and to exploit all rights, as set out in our [licence](#).

The Submitting Author accepts and understands that any supply made under these terms is made by BMJ to the Submitting Author unless you are acting as an employee on behalf of your employer or a postgraduate student of an affiliated institution which is paying any applicable article publishing charge ("APC") for Open Access articles. Where the Submitting Author wishes to make the Work available on an Open Access basis (and intends to pay the relevant APC), the terms of reuse of such Open Access shall be governed by a Creative Commons licence – details of these licences and which [Creative Commons](#) licence will apply to this Work are set out in our licence referred to above.

Other than as permitted in any relevant BMJ Author's Self Archiving Policies, I confirm this Work has not been accepted for publication elsewhere, is not being considered for publication elsewhere and does not duplicate material already published. I confirm all authors consent to publication of this Work and authorise the granting of this licence.

1  
2  
3  
4  
5  
6  
7  
8  
9  
10  
11  
12  
13 **Cohort profile:**

14  
15 **Actionable Register of Geneva Outpatients with SARS-CoV-2**

16  
17  
18 **(ARGOS)**

19  
20  
21  
22  
23  
24  
25  
26 Camille Genecand<sup>†,1,4</sup>, Flora Koegler<sup>\*,†,2</sup>, Dan Lebowitz<sup>3</sup>, Denis Mongin<sup>1</sup>, Simon  
27  
28 Regard<sup>1,6</sup>, Mayssam Nehme<sup>4</sup>, Olivia Brillard<sup>4</sup>, Marwène Grira<sup>4</sup>, Dominique Joubert<sup>5</sup>,  
29  
30 Pierre Chopard<sup>5</sup>, Elisabeth Delaporte<sup>1</sup>, Jerome Stirnemann<sup>2</sup>, Idris Guessous<sup>4</sup>, Aglaé  
31  
32 Tardin<sup>1</sup>, Delphine S. Courvoisier<sup>5</sup>  
33  
34  
35  
36  
37  
38  
39  
40  
41  
42  
43  
44  
45  
46

47 **† Joint first authors**

48  
49 **\* Corresponding author**

50 [flora.koegler@hcuge.ch](mailto:flora.koegler@hcuge.ch)

51 Division of General Internal Medicine,  
52 University Hospitals of Geneva,  
53 4, rue Gabrielle Perret-Gentil,  
54 CH, Geneva, Switzerland  
55  
56  
57  
58  
59  
60

**Authors affiliations:**

<sup>1</sup>Division of General Surgeon, Geneva Directorate of Health, Geneva, Switzerland;

<sup>2</sup>Division of General Internal Medicine, Department of Internal Medicine, Geneva

University Hospital, Geneva, Switzerland; <sup>3</sup>Infection Control Program, University of

Geneva Hospitals and Faculty of Medicine, University of Geneva, Geneva, Switzerland;

<sup>4</sup>Division of Primary Care Medicine, Department of Community Medicine and Primary

Care and Emergency Medicine, Geneva University Hospital, Geneva, Switzerland;

<sup>5</sup>Quality of Care Service, University Hospital of Geneva, Geneva, Switzerland; <sup>6</sup>Division

of Emergency Medicine, Department of Acute Medicine, Geneva University Hospital,

Geneva, Switzerland.

## Abstract:

### **Purpose**

The Actionable Register of Geneva Outpatients with SARS-CoV-2 (ARGOS) is an ongoing prospective cohort created by the Geneva Directorate of Health (GDH). It consists of an operational database compiling all SARS-CoV-2 test results conducted in the Geneva area since late February 2020. While the disease evolution of patients hospitalized with SARS-CoV-2 are now relatively numerous, the same cannot be said for outpatients. This article aims at presenting a comprehensive outpatient cohort in light of the varying public health measures in Geneva, Switzerland, since March 2020.

### **Participants**

As of July 28, 2020, the database included 58'226 patients, among which 6848 had at least one positive test result for SARS-CoV-2. Among all positive patients, 66.8% were contacted once, and 21% of participants had 3 or more follow-up calls. Participation rate is 96.9%. Data collection is ongoing.

### **Findings to date**

ARGOS data illustrates the magnitude of COVID-19 pandemic in Geneva, Switzerland, and details a variety of population factors and outcomes. The content of the cohort includes demographic data, comorbidities and risk factors for poor clinical outcome, COVID-19 symptoms, environmental and socio-economic factors, contact tracing data, hospitalizations and deaths.

### Future plans:

The data of this large real-world registry provides a valuable resource for various types of research, such as epidemiological research or policy assessment as it illustrates the impact of public health policies and overall disease burden of COVID-19.

### **STRENGTHS AND LIMITATIONS OF THIS STUDY**

- ARGOS' main strength consists of its large number of cases, representative of all diagnosed cases on a regional level with the primary aim of assessing all cases.
- ARGOS involves every tested individual and is not limited to hospitalized patients, thus providing a valuable resource to assess the impact of public health policies and overall disease burden of COVID-19 in a geographically defined population.
- To mitigate confounding effects and improve data analysis and interpretation, we present the data according to four policy periods.
- This cohort is multicentric as it includes all tests performed in Geneva's hospitals (both public and private), private practices and medical centers.
- Due to operational needs, symptoms and comorbidities are self-reported, which may lead to measurement error or misclassification.

Text word count: 2670 words



## **Introduction**

In December 2019, an increasing number of cases of pneumonia caused by a novel coronavirus, SARS-CoV-2<sup>1</sup>, was observed in Wuhan, China. On March 11, 2020, the World Health Organization (WHO) declared the coronavirus disease 2019 (COVID-19) outbreak a global pandemic(1,2). As of July 29, 2020, the virus spread to 188 countries, infected close to 17 million people and caused 662 000 deaths(3,4). In Switzerland, the cumulative incidence of laboratory confirmed COVID-19<sup>2</sup> cases is one of the highest in Europe, with about 400 confirmed cases per 100'000 population at the end of July 2020(4,5) In the Geneva area, the first COVID-19<sup>2</sup> patient was diagnosed on February 26, 2020(6). Possibly due to the city's geographical proximity to Northern Italy(7), the epidemic curve showed a steep upward trend. The first wave of the epidemic peaked in Geneva on April 2nd with 233 cases in 24 hours in an area with a population of 500'000. Geneva's cumulative incidence of confirmed cases is almost 3 times that of Switzerland(5), with more than 1'000 cases per 100'000 population(6), while the seroprevalence was estimated to be close to 10 times that of the confirmed cases as 9.7% of the population had antibodies three weeks after the height of the epidemic(8,9).

A database was created in early March in order to contact new cases and keep track of their follow-up. The Actionable Register of Geneva Outpatients with SARS-CoV-2<sup>1</sup> (ARGOS) includes all SARS-CoV-2<sup>1</sup> test results conducted in the Geneva area since late February 2020, as well as those from Geneva residents being tested in other Swiss cantons. The primary aim of this article is to present this comprehensive cohort, its

---

<sup>1</sup> Severe acute respiratory syndrome coronavirus 2

<sup>2</sup> coronavirus disease 2019

1  
2  
3 characteristics and the content of the data collected. The secondary aim is to interpret  
4 the data according to the public health measures implemented over time since the  
5 cohort profile was influenced by the varying policies enacted by the Swiss government  
6 and the Geneva State.  
7  
8  
9  
10  
11

## 12 13 COHORT DESCRIPTION 14

### 15 16 The ARGOS database 17

18  
19 ARGOS is an ongoing prospective cohort created by the Geneva Directorate of Health  
20 (GDH) and consists of an operational database compiling all SARS-CoV-2 test results  
21 conducted in the Geneva area. Data are collected and managed using the REDCap  
22 electronic data capture tools(10,11) allowing the GDH to contact positive cases in order  
23 to promote public health measures and coordinate medical follow-up. It is set up as a  
24 collaborative tool between different institutions and medical entities, including the GDH,  
25 Geneva University Hospitals (HUG), and Geneva's main private medical centers. The  
26 latter have restricted access to data regarding their own patients only. The GDH and HUG  
27 are the only users to implement follow-up data in the electronic register. The data is  
28 hosted on HUG's secure servers. The register is administered by a committee of co-  
29 Principal Investigators belonging to the GDH and HUG, with the agreement of the  
30 cantonal ethic committee (CCER protocol 2020-01273). Participants in the database had  
31 the opportunity to refuse to participate in the registry, and those who did are excluded  
32 from the analyses presented here. The participation rate was 96.9%. Deidentified ARGOS  
33 data can be available upon reasonable request, including a research protocol, using the  
34 [form](#).  
35  
36  
37  
38  
39  
40  
41  
42  
43  
44  
45  
46  
47  
48  
49  
50  
51  
52  
53  
54  
55  
56  
57  
58  
59  
60

## Data collection

All Geneva laboratories performing SARS-CoV-2 testing are required to send the results to the GDH. Swabs are collected from the upper respiratory tract in medical centers, private practice or during home visits by trained healthcare professionals(12). Between January 24 and July 28, 2020, 68577 tests for SARS-CoV-2 were performed by real-time reverse transcriptase–polymerase chain reaction assays and recorded in the ARGOS database. The majority were performed in the Geneva area and a small number consisted of tests conducted on Geneva residents in other Swiss Cantons, and declared to the GDH by the Federal Office of Public Health. Furthermore, hospitals and the Geneva Cantonal Population Office are required to declare COVID-19 related hospitalizations and deaths respectively, which are also recorded in ARGOS. Importantly, patients reporting COVID-19 symptoms between March 13 and March 29, 2020, did not get tested due to shortage of testing materials, unless they were healthcare workers, considered at-risk or hospitalized. However, symptomatic patients who visited the HUG COVID-19 testing center without fulfilling testing criteria were entered in the database as “suspected cases”. Some of these patients later received a test as policy evolved on March 30, 2020.

## Patient and Public involvement

Patients or the public were not involved in research.

## What is being measured?

1  
2  
3 An overview of collected data is provided in Table 1. The surveys were created by the  
4 GDH and HUG medical task forces. Within the first 48h of testing, patients with a  
5 positive test result for COVID-19 receive a call by a professional nurse with support  
6 from a medical doctor if needed. During this call, demographic data are collected(13),  
7 as well as symptoms(14–17), clinical and environmental risk factors, and clinical red  
8 flags. A special attention is paid to psychosocial and cultural factors, and resources are  
9 provided when needed. The clinical evaluation is used to identify patients who need  
10 immediate emergency care, or to address them for syw-up care by their general  
11 practitioner, by one of Geneva's medical centers, or by the GDH-HUG team via  
12 telemedicine. These follow-up calls are performed either by a professional nurse or by a  
13 medical student with supervision from a medical doctor. Patients' symptoms are  
14 recorded in subsequent surveys on the database. Patients' estimated compliance to  
15 isolation measures are also assessed. Depending on the patients' health condition,  
16 follow-up calls continue every one to two days until recovery. Some patients from the  
17 cohort are also called back at 1-month and 3-months to monitor the persistence of  
18 symptoms. All SARS-CoV-2 positive patients in Geneva who require hospitalization are  
19 admitted at HUG. At the time of discharge from the hospital, they receive follow-up calls  
20 by the HUG team as long as required by their health condition. COVID-19 positive  
21 patients identified as nursing home residents or who are hospitalized at the time of  
22 diagnosis are not systematically called since they already receive medical attention and  
23 isolation measures are enforced by the medical staff. As of April 27, 2020, close  
24 contacts of index cases are individually contacted and followed up until the end of the  
25 quarantine period (10 days). The type of contact they had with the index case, the  
26  
27  
28  
29  
30  
31  
32  
33  
34  
35  
36  
37  
38  
39  
40  
41  
42  
43  
44  
45  
46  
47  
48  
49  
50  
51  
52  
53  
54  
55  
56  
57  
58  
59  
60

1  
2  
3 presence of COVID-19 symptoms and their compliance to quarantine measures are  
4  
5 also recorded.  
6  
7

### 8 **Findings to date**

9  
10  
11 On July 28, 2020, of all 58'226 patients recorded in the ARGOS database, 6848 had at  
12  
13 least one positive test result, 51'378 had one or more negative test results and no  
14  
15 positive one, and 236 were suspected COVID-19 cases without a positive test to  
16  
17 confirm the disease. Therefore, the positivity rate of recorded patients from February 26  
18  
19 to July 28 was 11.5%. Among these patients, 791 persons did not allow their data to be  
20  
21 used for research and were excluded from analyses. The remaining number of positive  
22  
23 cases available for analysis is 6635. 66.8% of participants have a first contact only,  
24  
25 8.3% and 3.9% have one and two follow-up call respectively. 21% of participants have  
26  
27 three or more follow-up calls. From the end of February until the end of April, nearly all  
28  
29 positive patients had symptoms. The cohort shows a slight female predominance, with  
30  
31 women representing 51.3% to 57.1% of all patients depending on the defined period  
32  
33 (Table 2). Eighty to 90 percent of all recorded patients have no risk factor for a poor  
34  
35 clinical outcome(18). Significant differences are observed for age, comorbidities and  
36  
37 presence of acute symptoms upon testing depending on the phases of the epidemic  
38  
39 and of public health measures, highlighting the impact of changes in testing policies  
40  
41 over time in Geneva. To mitigate confounding effects and improve data analysis and  
42  
43 interpretation, we present the data according to four policy periods.  
44  
45  
46  
47  
48  
49  
50

51  
52 February 26 to March 13, 2020 (first phase)  
53  
54  
55  
56  
57  
58  
59  
60

1  
2  
3 Unlike many countries which implemented near-complete lockdowns(19) and despite a  
4 high burden of confirmed cases, Switzerland decided to adopt less severe measures.  
5  
6 On February 26, 2020, gatherings of more than 1000 people were prohibited in the  
7  
8 country. The first two and a half weeks of the epidemic were characterized by a majority  
9  
10 of positive tests among people aged 20 to 64 years-old (82.2%). Five percent of cases  
11  
12 were above 80 years old, and all cases were experiencing acute symptoms. The main  
13  
14 risk factors among infected patients were advanced age, with 15.4% being older than  
15  
16 65, followed by chronic respiratory disease, cardio-vascular disease and diabetes (5%,  
17  
18 4.6%, 2.9% respectively). During this period, the positivity rate was 9.5%.

19  
20  
21  
22  
23  
24  
25 March 14 to March 30, 2020 (second phase)

26  
27  
28 On the evening of March 13, 2020, the Swiss government and local authorities placed  
29  
30 the country under partial lockdown. Border crossings were restricted to essential  
31  
32 workers, schools were closed, workers were asked to work from home and only  
33  
34 essential services remained open(20). Public and private gatherings of more than 100  
35  
36 people and more than 5 people were banned on March 13, and March 20, 2020,  
37  
38 respectively. From March 13 to March 29, 2020, SARS-CoV-2 reverse transcriptase–  
39  
40 polymerase chain reaction testing was temporarily restricted to hospitalized and at-risk  
41  
42 patients (>64 years old, presence of at least one risk factor for severe COVID-19,  
43  
44 healthcare workers) due to shortage of testing materials. As patients receiving a test  
45  
46 were selected based on their medical history and clinical course, we observed a first  
47  
48 shift in the age of positive cases: the proportion of individuals 65 years and older, who  
49  
50 are considered at risk for poor outcome, was higher (23.9%), and so was the presence  
51  
52 of risk factors (chronic respiratory disease (11%), cardio-vascular disease (7.6%),  
53  
54  
55  
56  
57  
58  
59  
60

1  
2  
3 diabetes (5.3%) and immunosuppression (3.9%)). Individuals aged 20 to 39 years old  
4 were less represented during this period (28.5%). Healthcare workers were tested  
5 independently of their personal risk factors, and represented 12.2% of the positive  
6 patients. Limited testing modified the shape of the epidemic curve. It was concomitant  
7 with a sudden decrease of daily cases, mainly for younger people (Figure 1) and we  
8 witnessed a higher positivity rate (30.9%).  
9

10  
11  
12  
13  
14  
15  
16  
17  
18 March 31 to April 27, 2020 (third phase)  
19

20  
21 During this period, political measures remained identical but testing policy evolved. As  
22 of March 30, 2020, all patients visiting Geneva's hospitals and medical centers and  
23 presenting symptoms consistent with COVID-19 were tested regardless of their age or  
24 comorbidities. The number of daily cases reached its peak shortly after this policy came  
25 into effect and the positivity rate decreased to 18.4%. The proportion of individuals 65  
26 years and older was 23.7% during this period. Nursing home residents were  
27 significantly more impacted by COVID-19, reaching 8.5% of all positive cases. 10.5% of  
28 positive patients were identified as living in an at-risk environment (collective house  
29 resident, homeless people)(21). The proportion of healthcare workers decreased  
30 significantly as of April 2020, reaching 4.2% of cases.  
31  
32  
33  
34  
35  
36  
37  
38  
39  
40  
41  
42  
43  
44

45 April 28 to July 28, 2020 (fourth phase)  
46

47  
48 On April 27, 2020, the Swiss authorities started to lift some of the lockdown measures  
49 following the decreasing incidence of new cases and hospitalizations. During the first  
50 step of containment release, non-urgent medical and surgical care, do-it-yourself stores  
51 and basic services like hairdressers could reopen. Primary schools opened under some  
52  
53  
54  
55  
56  
57  
58  
59  
60

1  
2  
3 regulations as well. The second step started on May 11, 2020 with the reopening of all  
4 shops, restaurants, and museums. Finally, on June 6, 2020, gatherings of less than 300  
5 people were allowed, and nightclubs, cinemas, theaters and most schools reopened.  
6  
7

8  
9  
10 The end of the lockdown measures was accompanied by the regulation of test prices in  
11 order to facilitate the access to free testing of symptomatic patients in Geneva. During  
12 this fourth phase, the cumulative number of cases reached a plateau. The proportion of  
13 patients with acute symptoms decreased significantly, reaching 86.5%. We observed a  
14 second shift in the age of positive cases, with 56.6% aged from 0 to 39 years, and only  
15 10.8% older than 65 years old. 90.6% had no risk factor for severe disease. The  
16 positivity rate was 2.1%.  
17  
18  
19  
20  
21  
22  
23  
24  
25

26  
27 One month after the beginning of the third step of containment release, we observed a  
28 new increase in daily cases, mainly affecting people from 20 to 39 years old, and  
29 leading to implementation of new public health policies. This ongoing phase of the  
30 epidemic will not be discussed in this article.  
31  
32  
33  
34  
35  
36

## 37 Discussion

38  
39  
40 COVID-19 represents a major challenge to each country's healthcare system.

41  
42 Collaboration between healthcare providers and public health authorities is particularly  
43 important in order to improve both our understanding of the disease and our  
44 response(22–24). The publication of the ARGOS cohort underscores our willingness to  
45 share data for research purposes and for optimizing public health measures.  
46  
47  
48  
49  
50  
51

52  
53 Furthermore, analysis from the ARGOS database illustrates the impact of various  
54 testing policies on the proportion of risk factors or age groups identified among  
55  
56  
57



1  
2  
3 confirmed cases. The partition of data analysis and interpretation according to policy  
4  
5 period confirms the variations within each group depending on the period of interest and  
6  
7 could thus guide public health decisions.  
8  
9

## 10 11 STRENGTHS AND LIMITATIONS 12 13

14 The state of Geneva accounts for half a million residents and the local Directorate of  
15  
16 Health ordered the recording of all COVID-19 positive cases since the beginning of the  
17  
18 epidemic, according to recommendations from the Federal Office of Public Health. Due  
19  
20 to this policy, the database's main strength consists of its large number of cases,  
21  
22 representative of all diagnosed cases on a regional level primarily serving operational  
23  
24 needs and not scientific purposes, with one main objective: assessing all cases. This  
25  
26 cohort is also multicentric as it includes all tests performed in Geneva's hospitals (both  
27  
28 public and private), private practices and medical centers. The fact that a very large  
29  
30 proportion of all cases are assessed reduces the risk of biased data. Also, as data is  
31  
32 recorded on the day of the call to the patient, recall bias is very low. Finally, the  
33  
34 ARGOS<sup>3</sup> database is characterized by a high number of follow-ups.  
35  
36  
37  
38  
39

40 Despite these strengths, ARGOS has been influenced by the testing policy and the  
41  
42 results must be seen in light of these influences. First, individuals without risk factors for  
43  
44 COVID-19 and those younger than 65 years old are underrepresented in the database  
45  
46 during the testing restriction period. The shapes of the graphics in Figure 1 and 2  
47  
48 confirm the impact of this policy as there is a sudden decrease in number of cases after  
49  
50 March 20, 2020, when restriction started. Other factors could have amplified this  
51  
52 phenomenon such as less symptomatic forms of disease in younger people and  
53  
54  
55  
56  
57  
58  
59  
60

1  
2  
3 children. Reasons to get tested have also evolved over the first months of the epidemic.  
4  
5 For example, anosmia or ageusia became a testing criteria only in late April. Patients  
6  
7 who presented with these isolated symptoms within the first two months of the epidemic  
8  
9 could thus have been undertested. Seroprevalence study results confirm the  
10  
11 underrepresentation of certain groups and the undertesting of the overall population (8).  
12  
13  
14

15 Nevertheless, ARGOS has several limitations. First, measurement error due to lack of  
16  
17 detail of some variables can be observed, since efficiency was prioritized over detail-  
18  
19 oriented data collection. For instance, individuals' level of education is not recorded.  
20  
21 Secondly, misclassification also certainly occurs as symptoms and risk factors are self-  
22  
23 reported. Moreover, recording of information in ARGOS is performed by a large and  
24  
25 evolving team of professionals, including healthcare workers with various backgrounds,  
26  
27 medical students, or police recruits as of May 2020. Due to the crisis situation, training  
28  
29 contents delivered to the GDH team often evolved, leading to a certain level of  
30  
31 heterogeneity of phone interviews and a greater risk for misclassification of medical  
32  
33 information. Thirdly, the patient information gathered is tailored to operational needs  
34  
35 and growing scientific knowledge. For example, anosmia and ageusia were initially  
36  
37 classified as general ENT symptoms, and were later detailed separately as they were  
38  
39 recognized as frequent and specific manifestations of COVID-19 (25).  
40  
41  
42  
43  
44  
45

46 In conclusion, ARGOS is a large, real-world registry of individuals tested for SARS-  
47  
48 Cov2<sup>1</sup>. Unlike many other registries, it involves every tested individual and is not limited  
49  
50 to hospitalized patients, thus providing a precious resource to assess the impact of  
51  
52 public health policies and overall disease burden of COVID-19.  
53  
54  
55  
56  
57  
58  
59  
60

## **COLLABORATION**

The publication of the ARGOS cohort underscores our willingness to share data for research purposes and for optimizing public health measures. Deidentified ARGOS data can be available upon reasonable request, including a research protocol, using the following [form](#).

## **DATA SHARING STATEMENT**

The deidentified data underlying this article will be shared on reasonable request to the corresponding author, using the [form](https://edc.hcuge.ch/surveys/?s=TLT9EHE93C) (<https://edc.hcuge.ch/surveys/?s=TLT9EHE93C>)

## **ETHICS APPROVAL**

Research received the agreement of the Cantonal Ethic Committee of Geneva (CCER protocol 2020-01273).

## **FUNDING**

ARGOS is supported by Geneva State public funds and by a grant from The Swiss National Science Foundation LIVES, project #2020-01273.

## **ACKNOWLEDGEMENTS**

We thank all members of the COVID-19 team at the General Directorate of Health, as well as all healthcare providers and laboratories involved in the management of COVID-

1  
2  
3 19 patients. We also wish to thank all patients and their contacts who are included in the  
4  
5 ARGOS database.  
6  
7

### 8 **CONFLICTS OF INTERESTS**

9  
10  
11  
12 The authors declare no conflict of interest.  
13  
14

### 15 **AUTHORS CONTRIBUTION**

16  
17 Each author contributed to this article, based on the criteria of the International Committee  
18 for Medical Journal Editors. Camille Genecand and Flora Kogler conceptualized and  
19 designed the article format, analyzed and interpreted the data, and conducted the  
20 literature review. Dan Lebowitz participated to the article design and reviewed it. Delphine  
21 Courvoisier designed the study's analytic strategy, reviewed the article, and revisited it  
22 critically. Denis Mongin conducted the data analysis and participated in its formulation in  
23 the text. Simon Regard, Pierre Chopard, Marwène Grira, Elisabeth Delaporte, Mayssam  
24 Nehme, Olivia Braillard, Dominique Joubert, Idris Guessous, Jerome Stirnemann and  
25 Aglaé Tardin helped acquisition of data and reviewed the article's content critically.  
26  
27  
28  
29  
30  
31  
32  
33  
34  
35  
36  
37  
38  
39  
40  
41  
42  
43  
44  
45  
46  
47  
48  
49  
50  
51  
52  
53  
54  
55  
56  
57  
58  
59  
60

## References:

1. Cucinotta D, Vanelli M. WHO Declares COVID-19 a Pandemic. *Acta Bio-Medica Atenei Parm.* 2020;91(1):157–160.
2. Coronaviridae Study Group of the International Committee on Taxonomy of Viruses. The species Severe acute respiratory syndrome-related coronavirus: classifying 2019-nCoV and naming it SARS-CoV-2. *Nat. Microbiol.* 2020;5(4):536–544.
3. Dong E, Du H, Gardner L. An interactive web-based dashboard to track COVID-19 in real time. *Lancet Infect. Dis.* 2020;20(5):533–534.
4. Roser M, Ritchie H, Ortiz-Ospina E, et al. Coronavirus Pandemic (COVID-19). *Our World Data* [electronic article]. 2020;(https://ourworldindata.org/coronavirus). (Accessed August 2, 2020)
5. OFSP. Rapport quotidien sur la situation épidémiologique en Suisse et dans la Principauté de Liechtenstein. 2020;(Rapport quotidien sur la situation épidémiologique en ... - BAG <https://www.bag.admin.ch/bag/covid-19-lagebericht.pdf.download.pdf>)

- 1  
2  
3 6. DSES. COVID-19 - données complètes depuis le début de la pandémie. *GECH –*  
4 *Répub. Cant. Genève*. 2020;(https://www.ge.ch/document/covid-19-donnees-  
5 completes-debut-pandemie). (Accessed August 2, 2020)  
6  
7
- 8  
9  
10  
11 7. OFSP. Nouveau coronavirus COVID-19: premier cas confirmé en Suisse.  
12  
13 2020;(https://www.bag.admin.ch/bag/fr/home/das-  
14 bag/aktuell/medienmitteilungen.msg-id-78233.html). (Accessed August 2, 2020)  
15  
16  
17
- 18  
19 8. Stringhini S, Wisniak A, Piumatti G, et al. Repeated seroprevalence of anti-SARS-  
20  
21 CoV-2 IgG antibodies in a population-based sample from Geneva, Switzerland.  
22  
23 *medRxiv*. 2020;2020.05.02.20088898.  
24  
25
- 26  
27 9. Perez-Saez J, Lauer SA, Kaiser L, et al. Serology-informed estimates of SARS-  
28  
29 CoV-2 infection fatality risk in Geneva, Switzerland. *Lancet Infect. Dis*. 2020;  
30  
31
- 32  
33 10. Harris PA, Taylor R, Thielke R, et al. Research electronic data capture (REDCap)--  
34  
35 a metadata-driven methodology and workflow process for providing translational  
36  
37 research informatics support. *J. Biomed. Inform.* 2009;42(2):377–381.  
38  
39
- 40  
41 11. Harris PA, Taylor R, Minor BL, et al. The REDCap consortium: Building an  
42  
43 international community of software platform partners. *J. Biomed. Inform.*  
44  
45 2019;95:103208.  
46  
47
- 48  
49 12. Marty FM, Chen K, Verrill KA. How to Obtain a Nasopharyngeal Swab Specimen.  
50  
51 *N. Engl. J. Med.* 2020;382(22):e76.  
52  
53  
54  
55  
56  
57  
58  
59  
60

- 1  
2  
3 13. Guan W, Ni Z, Hu Y, et al. Clinical Characteristics of Coronavirus Disease 2019 in  
4  
5 China. *N. Engl. J. Med.* 2020;382(18):1708–1720.  
6  
7
- 8  
9 14. Vetter P, Vu DL, L’Huillier AG, et al. Clinical features of covid-19. *BMJ.*  
10  
11 2020;369:m1470.  
12  
13
- 14 15. Huang C, Wang Y, Li X, et al. Clinical features of patients infected with 2019 novel  
15  
16 coronavirus in Wuhan, China. *Lancet Lond. Engl.* 2020;395(10223):497–506.  
17  
18
- 19  
20 16. Giacomelli A, Pezzati L, Conti F, et al. Self-reported Olfactory and Taste Disorders  
21  
22 in Patients With Severe Acute Respiratory Coronavirus 2 Infection: A Cross-  
23  
24 sectional Study. *Clin. Infect. Dis. Off. Publ. Infect. Dis. Soc. Am.* 2020;71(15):889–  
25  
26 890.  
27  
28
- 29  
30 17. Greenhalgh T, Koh GCH, Car J. Covid-19: a remote assessment in primary care.  
31  
32 *BMJ.* 2020;368:m1182.  
33  
34
- 35  
36 18. ECDC. Rapid risk assessment: Coronavirus disease 2019 (COVID-19) pandemic:  
37  
38 increased transmission in the EU/EEA and the UK – eighth update. *Eur. Cent. Dis.*  
39  
40 *Prev. Control.* 2020;(https://www.ecdc.europa.eu/en/publications-data/rapid-risk-  
41  
42 assessment-coronavirus-disease-2019-covid-19-pandemic-eighth-update).  
43  
44 (Accessed August 2, 2020)  
45  
46
- 47  
48 19. Zhang J, Litvinova M, Liang Y, et al. Changes in contact patterns shape the  
49  
50 dynamics of the COVID-19 outbreak in China. *Science.* 2020;368(6498):1481–  
51  
52 1486.  
53  
54  
55  
56  
57  
58  
59  
60

- 1  
2  
3 20. OFSP. Le Conseil fédéral renforce les mesures contre le coronavirus pour protéger  
4 la santé de la population et soutient les secteurs touchés.  
5  
6  
7 2020;(https://www.bag.admin.ch/bag/fr/home/das-  
8 bag/aktuell/medienmitteilungen.msg-id-78437.html). (Accessed August 2, 2020)  
9  
10  
11  
12  
13 21. Arons MM, Hatfield KM, Reddy SC, et al. Presymptomatic SARS-CoV-2 Infections  
14 and Transmission in a Skilled Nursing Facility. *N. Engl. J. Med.*  
15  
16 2020;382(22):2081–2090.  
17  
18  
19  
20  
21 22. Islam N, Sharp SJ, Chowell G, et al. Physical distancing interventions and  
22 incidence of coronavirus disease 2019: natural experiment in 149 countries. *BMJ*  
23 [electronic article]. 2020;370. (https://www.bmj.com/content/370/bmj.m2743).  
24  
25  
26 (Accessed August 24, 2020)  
27  
28  
29  
30  
31 23. Koo JR, Cook AR, Park M, et al. Interventions to mitigate early spread of SARS-  
32 CoV-2 in Singapore: a modelling study. *Lancet Infect. Dis.* 2020;20(6):678–688.  
33  
34  
35  
36  
37 24. Baker MG, Wilson N, Anglemyer A. Successful Elimination of Covid-19  
38 Transmission in New Zealand. *N. Engl. J. Med.* 2020;383(8):e56.  
39  
40  
41  
42  
43 25. Lechien JR, Chiesa-Estomba CM, De Sisti DR, et al. Olfactory and gustatory  
44 dysfunctions as a clinical presentation of mild-to-moderate forms of the coronavirus  
45 disease (COVID-19): a multicenter European study. *Eur. Arch. Oto-Rhino-Laryngol.*  
46  
47  
48  
49  
50  
51  
52  
53  
54  
55  
56  
57  
58  
59  
60



1  
2  
3  
4  
5  
6  
7  
8  
9  
10  
11  
12  
13  
14  
15  
16  
17  
18  
19  
20  
21  
22  
23  
24  
25  
26  
27  
28  
29  
30  
31  
32  
33  
34  
35  
36  
37  
38  
39  
40  
41  
42  
43  
44  
45  
46  
47  
48  
49  
50  
51  
52  
53  
54  
55  
56  
57  
58  
59  
60

For peer review only

|                                                           |                                                                                                                                                                                                              |
|-----------------------------------------------------------|--------------------------------------------------------------------------------------------------------------------------------------------------------------------------------------------------------------|
| <u>Test result</u>                                        | <ul style="list-style-type: none"> <li>– Positive</li> <li>– Negative</li> <li>– COVID-19 suspected, no test performed</li> <li>– COVID-19 suspected, negative test result</li> </ul>                        |
| <u>Reason for testing</u>                                 | <ul style="list-style-type: none"> <li>– Acute symptoms consistent with COVID-19</li> <li>– Screening, no symptoms</li> <li>– Patient transfer between hospitals</li> </ul>                                  |
| <u>Demographics</u>                                       | <ul style="list-style-type: none"> <li>– Date of birth</li> <li>– Gender</li> <li>– Basic professional information</li> <li>– Personal and professional addresses</li> </ul>                                 |
| <u>Medical risk factors for COVID-19 negative outcome</u> | <ul style="list-style-type: none"> <li>– Cardiovascular disease</li> <li>– Hypertension</li> <li>– Chronic respiratory disease</li> <li>– Cancer</li> <li>– Immunosuppression</li> <li>– Diabetes</li> </ul> |
| <u>Environmental risk factors</u>                         | <ul style="list-style-type: none"> <li>– Homelessness</li> <li>– Nursing home resident</li> </ul>                                                                                                            |

|                                                                    |                                                                                                                                                                                                                                                                                                                                 |
|--------------------------------------------------------------------|---------------------------------------------------------------------------------------------------------------------------------------------------------------------------------------------------------------------------------------------------------------------------------------------------------------------------------|
|                                                                    | <ul style="list-style-type: none"> <li>– Asylum seeker or other migrant living in a collective housing</li> <li>– Living in another type of collective housing</li> </ul>                                                                                                                                                       |
| <u>Symptoms</u>                                                    | <ul style="list-style-type: none"> <li>– Cough</li> <li>– Presence of sputum</li> <li>– Dyspnea</li> <li>– Fever (&gt; 38C)</li> <li>– Headache</li> <li>– Fatigue</li> <li>– Arthralgia and/or myalgia</li> <li>– ENT complaints (sore throat, rhinorrhea, anosmia or ageusia)</li> <li>– Gastrointestinal symptoms</li> </ul> |
| <u>Factors likely to adversely influence the course of disease</u> | <ul style="list-style-type: none"> <li>– High anxiety level</li> <li>– Feeling of isolation</li> <li>– Difficulties in daily management</li> </ul>                                                                                                                                                                              |
| <u>Red Flags</u>                                                   | <ul style="list-style-type: none"> <li>– New-onset or worsening dyspnea</li> <li>– Fever for more than 5 days, or worsening fever non responding to treatment</li> </ul>                                                                                                                                                        |

|                                                                        |                                                                                                                                                                                                                                                                                                                        |
|------------------------------------------------------------------------|------------------------------------------------------------------------------------------------------------------------------------------------------------------------------------------------------------------------------------------------------------------------------------------------------------------------|
|                                                                        | <ul style="list-style-type: none"> <li>– Deterioration of the general status</li> <li>– Worsening cough</li> <li>– Hemoptysis</li> <li>– Confusion</li> <li>– Gastrointestinal symptoms with dehydration</li> <li>– Moderate to severe chest pain</li> </ul>                                                           |
| <u>Positive patients' compliance to recommended isolation measures</u> | <ul style="list-style-type: none"> <li>– Full compliance</li> <li>– Partial compliance</li> <li>– Insufficient compliance</li> </ul>                                                                                                                                                                                   |
| <u>Timeline</u>                                                        | <ul style="list-style-type: none"> <li>– Date of symptom onset</li> <li>– Date of testing</li> <li>– Initial date of (self-)isolation</li> </ul>                                                                                                                                                                       |
| <u>Hospitalizations</u>                                                | <ul style="list-style-type: none"> <li>– Date of hospitalization</li> <li>– Date of release</li> <li>– Hospitalization ward: <ul style="list-style-type: none"> <li>– Visit at the emergency department only</li> <li>– Stay in non-intensive care units</li> <li>– Stay in intensive care unit</li> </ul> </li> </ul> |
| <u>Deaths</u>                                                          | <ul style="list-style-type: none"> <li>– Site (at home, nursing home, hospital)</li> </ul>                                                                                                                                                                                                                             |

|                        |                                                                                                                                                                                                                                                                                                                                                                                                                                                                                                                                                                  |
|------------------------|------------------------------------------------------------------------------------------------------------------------------------------------------------------------------------------------------------------------------------------------------------------------------------------------------------------------------------------------------------------------------------------------------------------------------------------------------------------------------------------------------------------------------------------------------------------|
|                        | <ul style="list-style-type: none"> <li>– Date</li> </ul>                                                                                                                                                                                                                                                                                                                                                                                                                                                                                                         |
| <u>Contact tracing</u> | <ul style="list-style-type: none"> <li>– Number of close contacts per index case</li> <li>– Type of contact between index case and close contact: <ul style="list-style-type: none"> <li>– Living in the same household</li> <li>– Intimate contact</li> <li>– Professional</li> <li>– Healthcare environment</li> <li>– Social interaction</li> <li>– Recreational</li> <li>– Schooling</li> </ul> </li> <li>– Presence of symptoms at first call and follow-up calls</li> <li>– Compliance to quarantine measures at first call and follow-up calls</li> </ul> |

Table 1, Actionable Register of Geneva Outpatients with SARS-CoV-2 (ARGOS) collected data

|                                                                         | 2020-02-26<br>->2020-03-<br>13 | 2020-03-14<br>->2020-03-<br>30 | 2020-03-31<br>->2020-04-<br>27 | 2020-04-28<br>->2020-07-<br>28 | p      | Total       |
|-------------------------------------------------------------------------|--------------------------------|--------------------------------|--------------------------------|--------------------------------|--------|-------------|
| Number of positive patients                                             |                                |                                |                                |                                |        |             |
| n                                                                       | 241                            | 2793                           | 2785                           | 816                            |        | 6635        |
| Number of follow-up per patient recorded in ARGOS                       |                                |                                |                                |                                | <0.001 |             |
| First contact only                                                      | 83 (65.9)                      | 1662 (75.5)                    | 1757 (71.7)                    | 223 (28.1)                     |        | 3725 (66.8) |
| 1 Follow-up call                                                        | 9 (7.1)                        | 196 (8.9)                      | 150 (6.1)                      | 105 (13.2)                     |        | 460 (8.3)   |
| 2 follow-up calls                                                       | 11 (8.7)                       | 75 (3.4)                       | 71 (2.9)                       | 63 (7.9)                       |        | 220 (3.9)   |
| 3 or more follow-up calls                                               | 23 (18.3)                      | 269 (12.2)                     | 473 (19.3)                     | 404 (50.8)                     |        | 1169 (21.0) |
| Patients addressed to their general practitioner for clinical follow up |                                |                                |                                |                                |        |             |
|                                                                         | 5 (2.1)                        | 496 (18.5)                     | 1057 (44.1)                    | 190 (51.9)                     | <0.001 | 1748 (30.8) |

| Patients addressed to a medical center (not HUG <sup>5</sup> ) for clinical follow up |            |             |             |            |        |             |
|---------------------------------------------------------------------------------------|------------|-------------|-------------|------------|--------|-------------|
|                                                                                       | 1 (0.4)    | 41 (1.5)    | 246 (8.8)   | 16 (2.0)   | <0.001 | 304 (4.6)   |
| Age                                                                                   |            |             |             |            | <0.001 |             |
| 0-19                                                                                  | 6 (2.5)    | 65 (2.3)    | 109 (3.9)   | 74 (9.1)   |        | 254 (3.8)   |
| 20-39                                                                                 | 93 (38.6)  | 795 (28.5)  | 797 (28.6)  | 385 (47.5) |        | 2070 (31.2) |
| 40-64                                                                                 | 105 (43.6) | 1264 (45.3) | 1219 (43.8) | 263 (32.5) |        | 2851 (43.0) |
| 65-80                                                                                 | 25 (10.4)  | 380 (13.6)  | 279 (10.0)  | 44 (5.4)   |        | 728 (11.0)  |
| >80                                                                                   | 12 (5.0)   | 289 (10.3)  | 381 (13.7)  | 44 (5.4)   |        | 726 (11.0)  |
| Gender                                                                                |            |             |             |            | 0.004  |             |
| Male                                                                                  | 114 (47.3) | 1242 (44.5) | 1196 (42.9) | 395 (48.5) |        | 2947 (44.4) |
| Female                                                                                | 127 (52.7) | 1551 (55.5) | 1589 (57.1) | 418 (51.3) |        | 3685 (55.5) |
| Non binary                                                                            | 0 (0.0)    | 0 (0.0)     | 0 (0.0)     | 2 (0.2)    |        | 2 (0.0)     |
| Comorbidities                                                                         |            |             |             |            |        |             |
| Cardiovascular disease                                                                | 11 (4.6)   | 213 (7.6)   | 183 (6.6)   | 31 (3.8)   | 0.001  | 438 (6.6)   |
| Hypertension                                                                          | 10 (4.1)   | 339 (12.1)  | 258 (9.3)   | 49 (6.0)   | <0.001 | 656 (9.9)   |
| Chronic respiratory illness                                                           | 12 (5.0)   | 306 (11.0)  | 207 (7.4)   | 21 (2.6)   | <0.001 | 546 (8.2)   |
| Cancer                                                                                | 1 (0.4)    | 36 (1.3)    | 37 (1.3)    | 9 (1.1)    | 0.742  | 83 (1.3)    |
| Immunosuppression                                                                     | 3 (1.2)    | 108 (3.9)   | 91 (3.3)    | 17 (2.1)   | 0.021  | 219 (3.3)   |

|                                                            |             |              |              |            |        |             |
|------------------------------------------------------------|-------------|--------------|--------------|------------|--------|-------------|
| Diabetes                                                   | 7 (2.9)     | 149 (5.3)    | 121 (4.3)    | 22 (2.7)   | 0.006  | 299 (4.5)   |
| No risk factor                                             | 215 (89.2)  | 2241 (80.2)  | 2343 (84.1)  | 739 (90.6) | <0.001 | 5538 (83.5) |
| Age 65 and older                                           | 37 (15.4)   | 669 (24.0)   | 660 (23.7)   | 88 (10.9)  | <0.001 | 1454 (21.9) |
| Profession                                                 |             |              |              |            |        |             |
| health care professional                                   | 27 (11.2)   | 340 (12.2)   | 320 (11.5)   | 34 (4.2)   | <0.001 | 721 (10.9)  |
| Environmental risk factor                                  |             |              |              |            |        |             |
| Homelessness                                               | 0 (0.0)     | 5 (0.2)      | 10 (0.4)     | 0 (0.0)    | 0.274  | 15 (0.2)    |
| Nursing home resident                                      | 0 (0.0)     | 75 (2.7)     | 238 (8.5)    | 23 (2.8)   | <0.001 | 336 (5.1)   |
| Asylum seeker or other migrant living in a collective home | 0 (0.0)     | 6 (0.2)      | 19 (0.7)     | 0 (0.0)    | 0.007  | 25 (0.4)    |
| Collective home resident (other than migrant)              | 0 (0.0)     | 2 (0.1)      | 26 (0.9)     | 9 (1.1)    | <0.001 | 37 (0.6)    |
| Reason for testing                                         |             |              |              |            |        |             |
| Acute symptoms                                             | 241 (100.0) | 2793 (100.0) | 2784 (100.0) | 678 (86.5) | <0.001 | 6496 (98.4) |



| Testing                         |       |       |       |       |        |       |
|---------------------------------|-------|-------|-------|-------|--------|-------|
| Total number of tests performed | 2603  | 9522  | 16053 | 39044 |        | 67222 |
| Positivity rate (patient)       | 9.5 % | 30.9% | 18.4% | 2.1%  | <0.001 | 10.2% |

Table 2, ARGOS baseline characteristics of positive patients, Geneva, February 26 ,2020 – July 28, 2020. Policy periods are presented by grouping together before any measures, limited testing and confinement, increased testing and confinement, end of confinement. Comparison between subgroups is performed with Fisher's exact test, with p values computed by Monte Carlo simulation.

#### FIGURE LEGENDS

**Figure 1**, Number of cases per age category, Geneva, February 26 ,2020 – July 28, 2020. Vertical bars represent the daily cases, solid line represent the weekly moving average.

**Figure 2**, Epidemic Curve of the Confirmed Cases of Coronavirus Disease 2019 (COVID-19) in Geneva state, February 26 ,2020 – July 28, 2020, with policies timeline as described in the text. Vertical bars represent the daily cases (based on the date of the test result), solid blue line represents the weekly moving average and the solid black line the cumulative cases.

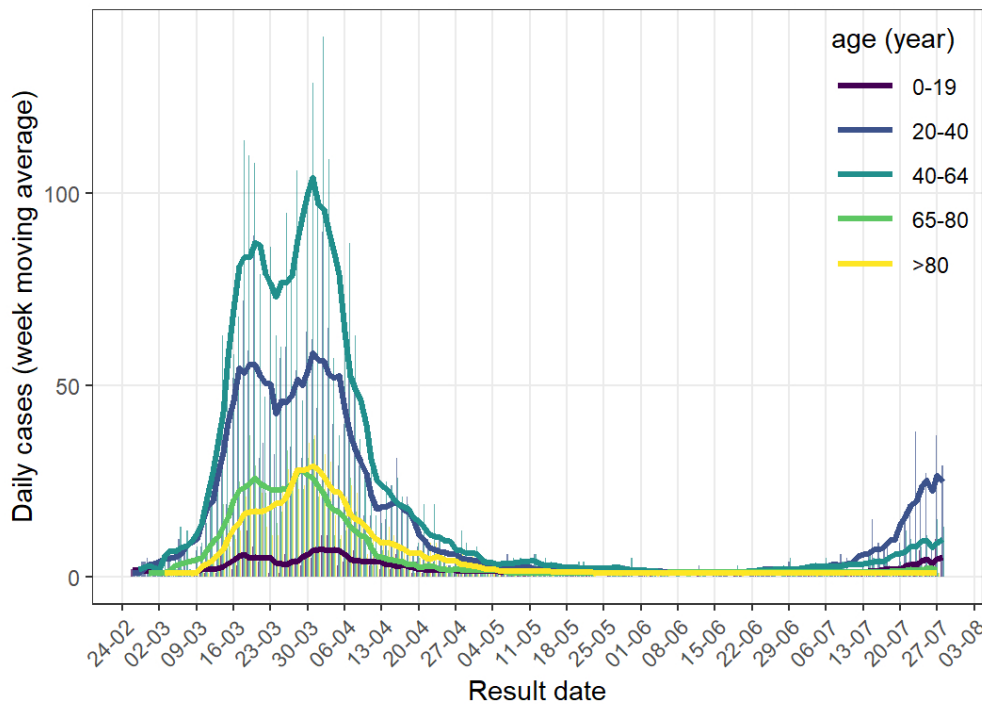

Figure 1, Number of cases per age category, Geneva, February 26 ,2020 – July 28, 2020. Vertical bars represent the daily cases, solid line represent the weekly moving average.

89x64mm (300 x 300 DPI)

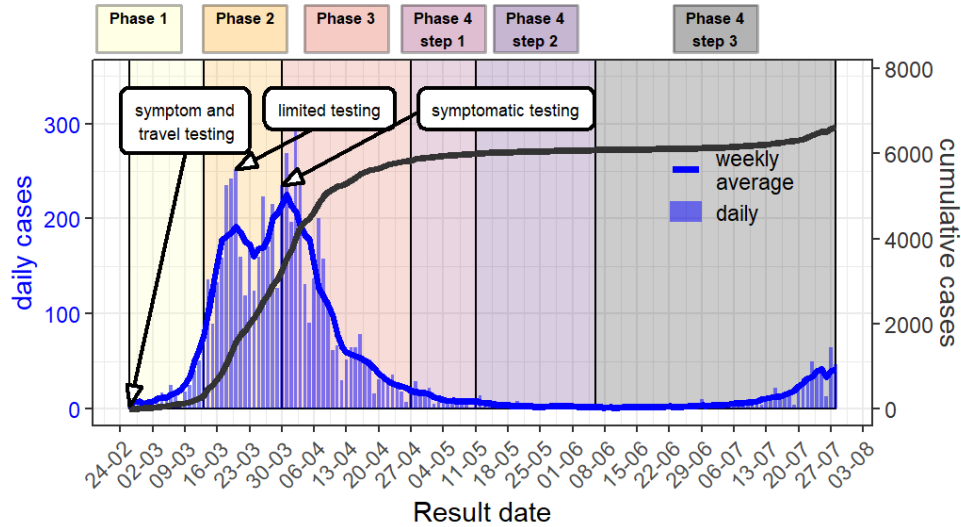

Figure 2, Epidemic Curve of the Confirmed Cases of Coronavirus Disease 2019 (COVID-19) in Geneva state, February 26 ,2020 – July 28, 2020, with policies timeline as described in the text. Vertical bars represent the daily cases (based on the date of the test result), solid blue line represents the weekly moving average and the solid black line the cumulative cases.

89x64mm (300 x 300 DPI)

# Reporting checklist for cohort study.

Based on the STROBE cohort guidelines.

## Instructions to authors

Complete this checklist by entering the page numbers from your manuscript where readers will find each of the items listed below.

Your article may not currently address all the items on the checklist. Please modify your text to include the missing information. If you are certain that an item does not apply, please write "n/a" and provide a short explanation.

Upload your completed checklist as an extra file when you submit to a journal.

In your methods section, say that you used the STROBE cohort reporting guidelines, and cite them as:

von Elm E, Altman DG, Egger M, Pocock SJ, Gøtzsche PC, Vandenbroucke JP. The Strengthening of Reporting of Observational Studies in Epidemiology (STROBE) Statement: guidelines for reporting observational studies.

|                           |                     | Reporting Item                                                                                  | Page Number |
|---------------------------|---------------------|-------------------------------------------------------------------------------------------------|-------------|
| <b>Title and abstract</b> |                     |                                                                                                 |             |
| Title                     | <a href="#">#1a</a> | Indicate the study's design with a commonly used term in the title or the abstract              | 1           |
| Abstract                  | <a href="#">#1b</a> | Provide in the abstract an informative and balanced summary of what was done and what was found | 3-4         |
| <b>Introduction</b>       |                     |                                                                                                 |             |
| Background / rationale    | <a href="#">#2</a>  | Explain the scientific background and rationale for the investigation being reported            | 5-6         |
| Objectives                | <a href="#">#3</a>  | State specific objectives, including any prespecified hypotheses                                | 5-6         |
| <b>Methods</b>            |                     |                                                                                                 |             |
| Study design              | <a href="#">#4</a>  | Present key elements of study design early in the paper                                         | 6-7         |
| Setting                   | <a href="#">#5</a>  | Describe the setting, locations, and relevant dates, including periods of                       | 7-8         |

recruitment, exposure, follow-up, and data collection

|    |                            |                      |                                                                                                                                                                                                                                                                          |
|----|----------------------------|----------------------|--------------------------------------------------------------------------------------------------------------------------------------------------------------------------------------------------------------------------------------------------------------------------|
| 1  |                            |                      |                                                                                                                                                                                                                                                                          |
| 2  |                            |                      |                                                                                                                                                                                                                                                                          |
| 3  | Eligibility criteria       | <a href="#">#6a</a>  | Give the eligibility criteria, and the sources and methods of selection of participants. Describe methods of follow-up. 7-8                                                                                                                                              |
| 4  |                            |                      |                                                                                                                                                                                                                                                                          |
| 5  |                            |                      |                                                                                                                                                                                                                                                                          |
| 6  | Eligibility criteria       | <a href="#">#6b</a>  | For matched studies, give matching criteria and number of exposed and unexposed n/a                                                                                                                                                                                      |
| 7  |                            |                      |                                                                                                                                                                                                                                                                          |
| 8  |                            |                      |                                                                                                                                                                                                                                                                          |
| 9  |                            |                      |                                                                                                                                                                                                                                                                          |
| 10 | Variables                  | <a href="#">#7</a>   | Clearly define all outcomes, exposures, predictors, potential confounders, and effect modifiers. Give diagnostic criteria, if applicable 7-8, table 1                                                                                                                    |
| 11 |                            |                      |                                                                                                                                                                                                                                                                          |
| 12 |                            |                      |                                                                                                                                                                                                                                                                          |
| 13 |                            |                      |                                                                                                                                                                                                                                                                          |
| 14 |                            |                      |                                                                                                                                                                                                                                                                          |
| 15 | Data sources / measurement | <a href="#">#8</a>   | For each variable of interest give sources of data and details of methods of assessment (measurement). Describe comparability of assessment methods if there is more than one group. Give information separately for for exposed and unexposed groups if applicable. 7-9 |
| 16 |                            |                      |                                                                                                                                                                                                                                                                          |
| 17 |                            |                      |                                                                                                                                                                                                                                                                          |
| 18 |                            |                      |                                                                                                                                                                                                                                                                          |
| 19 |                            |                      |                                                                                                                                                                                                                                                                          |
| 20 |                            |                      |                                                                                                                                                                                                                                                                          |
| 21 |                            |                      |                                                                                                                                                                                                                                                                          |
| 22 | Bias                       | <a href="#">#9</a>   | Describe any efforts to address potential sources of bias 13-14                                                                                                                                                                                                          |
| 23 |                            |                      |                                                                                                                                                                                                                                                                          |
| 24 | Study size                 | <a href="#">#10</a>  | Explain how the study size was arrived at 9                                                                                                                                                                                                                              |
| 25 |                            |                      |                                                                                                                                                                                                                                                                          |
| 26 |                            |                      |                                                                                                                                                                                                                                                                          |
| 27 | Quantitative variables     | <a href="#">#11</a>  | Explain how quantitative variables were handled in the analyses. If applicable, describe which groupings were chosen, and why n/a                                                                                                                                        |
| 28 |                            |                      |                                                                                                                                                                                                                                                                          |
| 29 |                            |                      |                                                                                                                                                                                                                                                                          |
| 30 |                            |                      |                                                                                                                                                                                                                                                                          |
| 31 | Statistical methods        | <a href="#">#12a</a> | Describe all statistical methods, including those used to control for confounding table 2, legend                                                                                                                                                                        |
| 32 |                            |                      |                                                                                                                                                                                                                                                                          |
| 33 |                            |                      |                                                                                                                                                                                                                                                                          |
| 34 | Statistical methods        | <a href="#">#12b</a> | Describe any methods used to examine subgroups and interactions n/a                                                                                                                                                                                                      |
| 35 |                            |                      |                                                                                                                                                                                                                                                                          |
| 36 |                            |                      |                                                                                                                                                                                                                                                                          |
| 37 |                            |                      |                                                                                                                                                                                                                                                                          |
| 38 | Statistical methods        | <a href="#">#12c</a> | Explain how missing data were addressed 13                                                                                                                                                                                                                               |
| 39 |                            |                      |                                                                                                                                                                                                                                                                          |
| 40 |                            |                      |                                                                                                                                                                                                                                                                          |
| 41 |                            |                      |                                                                                                                                                                                                                                                                          |
| 42 | Statistical methods        | <a href="#">#12d</a> | If applicable, explain how loss to follow-up was addressed n/a                                                                                                                                                                                                           |
| 43 |                            |                      |                                                                                                                                                                                                                                                                          |
| 44 |                            |                      |                                                                                                                                                                                                                                                                          |
| 45 |                            |                      |                                                                                                                                                                                                                                                                          |
| 46 | Statistical methods        | <a href="#">#12e</a> | Describe any sensitivity analyses n/a                                                                                                                                                                                                                                    |
| 47 |                            |                      |                                                                                                                                                                                                                                                                          |
| 48 |                            |                      |                                                                                                                                                                                                                                                                          |

## Results

|    |              |                      |                                                                                                                                                                                                                                                                                     |
|----|--------------|----------------------|-------------------------------------------------------------------------------------------------------------------------------------------------------------------------------------------------------------------------------------------------------------------------------------|
| 50 |              |                      |                                                                                                                                                                                                                                                                                     |
| 51 |              |                      |                                                                                                                                                                                                                                                                                     |
| 52 | Participants | <a href="#">#13a</a> | Report numbers of individuals at each stage of study—eg numbers potentially eligible, examined for eligibility, confirmed eligible, included in the study, completing follow-up, and analysed. Give information separately for for exposed and unexposed groups if applicable. 6, 9 |
| 53 |              |                      |                                                                                                                                                                                                                                                                                     |
| 54 |              |                      |                                                                                                                                                                                                                                                                                     |
| 55 |              |                      |                                                                                                                                                                                                                                                                                     |
| 56 |              |                      |                                                                                                                                                                                                                                                                                     |
| 57 |              |                      |                                                                                                                                                                                                                                                                                     |
| 58 |              |                      |                                                                                                                                                                                                                                                                                     |
| 59 |              |                      |                                                                                                                                                                                                                                                                                     |

|    |                   |                      |                                                                                                                                                                                                                   |                         |
|----|-------------------|----------------------|-------------------------------------------------------------------------------------------------------------------------------------------------------------------------------------------------------------------|-------------------------|
| 1  | Participants      | <a href="#">#13b</a> | Give reasons for non-participation at each stage                                                                                                                                                                  | 9, table 2              |
| 2  |                   |                      |                                                                                                                                                                                                                   |                         |
| 3  | Participants      | <a href="#">#13c</a> | Consider use of a flow diagram                                                                                                                                                                                    | n/a                     |
| 4  |                   |                      |                                                                                                                                                                                                                   |                         |
| 5  | Descriptive data  | <a href="#">#14a</a> | Give characteristics of study participants (eg demographic, clinical, social) and information on exposures and potential confounders. Give information separately for exposed and unexposed groups if applicable. | 9-12, table 2, figure 2 |
| 6  |                   |                      |                                                                                                                                                                                                                   |                         |
| 7  |                   |                      |                                                                                                                                                                                                                   |                         |
| 8  |                   |                      |                                                                                                                                                                                                                   |                         |
| 9  |                   |                      |                                                                                                                                                                                                                   |                         |
| 10 |                   |                      |                                                                                                                                                                                                                   |                         |
| 11 |                   |                      |                                                                                                                                                                                                                   |                         |
| 12 | Descriptive data  | <a href="#">#14b</a> | Indicate number of participants with missing data for each variable of interest                                                                                                                                   | 9                       |
| 13 |                   |                      |                                                                                                                                                                                                                   |                         |
| 14 |                   |                      |                                                                                                                                                                                                                   |                         |
| 15 |                   |                      |                                                                                                                                                                                                                   |                         |
| 16 | Descriptive data  | <a href="#">#14c</a> | Summarise follow-up time (eg, average and total amount)                                                                                                                                                           | 9-12, figure 1          |
| 17 |                   |                      |                                                                                                                                                                                                                   |                         |
| 18 |                   |                      |                                                                                                                                                                                                                   |                         |
| 19 |                   |                      |                                                                                                                                                                                                                   |                         |
| 20 | Outcome data      | <a href="#">#15</a>  | Report numbers of outcome events or summary measures over time. Give information separately for exposed and unexposed groups if applicable.                                                                       | 9-12                    |
| 21 |                   |                      |                                                                                                                                                                                                                   |                         |
| 22 |                   |                      |                                                                                                                                                                                                                   |                         |
| 23 |                   |                      |                                                                                                                                                                                                                   |                         |
| 24 |                   |                      |                                                                                                                                                                                                                   |                         |
| 25 | Main results      | <a href="#">#16a</a> | Give unadjusted estimates and, if applicable, confounder-adjusted estimates and their precision (eg, 95% confidence interval). Make clear which confounders were adjusted for and why they were included          | 9-12, table 2           |
| 26 |                   |                      |                                                                                                                                                                                                                   |                         |
| 27 |                   |                      |                                                                                                                                                                                                                   |                         |
| 28 |                   |                      |                                                                                                                                                                                                                   |                         |
| 29 |                   |                      |                                                                                                                                                                                                                   |                         |
| 30 |                   |                      |                                                                                                                                                                                                                   |                         |
| 31 |                   |                      |                                                                                                                                                                                                                   |                         |
| 32 | Main results      | <a href="#">#16b</a> | Report category boundaries when continuous variables were categorized                                                                                                                                             | n/a                     |
| 33 |                   |                      |                                                                                                                                                                                                                   |                         |
| 34 |                   |                      |                                                                                                                                                                                                                   |                         |
| 35 |                   |                      |                                                                                                                                                                                                                   |                         |
| 36 | Main results      | <a href="#">#16c</a> | If relevant, consider translating estimates of relative risk into absolute risk for a meaningful time period                                                                                                      | n/a                     |
| 37 |                   |                      |                                                                                                                                                                                                                   |                         |
| 38 |                   |                      |                                                                                                                                                                                                                   |                         |
| 39 |                   |                      |                                                                                                                                                                                                                   |                         |
| 40 | Other analyses    | <a href="#">#17</a>  | Report other analyses done—e.g., analyses of subgroups and interactions, and sensitivity analyses                                                                                                                 | n/a                     |
| 41 |                   |                      |                                                                                                                                                                                                                   |                         |
| 42 |                   |                      |                                                                                                                                                                                                                   |                         |
| 43 |                   |                      |                                                                                                                                                                                                                   |                         |
| 44 | <b>Discussion</b> |                      |                                                                                                                                                                                                                   |                         |
| 45 |                   |                      |                                                                                                                                                                                                                   |                         |
| 46 | Key results       | <a href="#">#18</a>  | Summarise key results with reference to study objectives                                                                                                                                                          | 12                      |
| 47 |                   |                      |                                                                                                                                                                                                                   |                         |
| 48 | Limitations       | <a href="#">#19</a>  | Discuss limitations of the study, taking into account sources of potential bias or imprecision. Discuss both direction and magnitude of any potential bias.                                                       | 13-14                   |
| 49 |                   |                      |                                                                                                                                                                                                                   |                         |
| 50 |                   |                      |                                                                                                                                                                                                                   |                         |
| 51 |                   |                      |                                                                                                                                                                                                                   |                         |
| 52 |                   |                      |                                                                                                                                                                                                                   |                         |
| 53 |                   |                      |                                                                                                                                                                                                                   |                         |
| 54 | Interpretation    | <a href="#">#20</a>  | Give a cautious overall interpretation considering objectives, limitations, multiplicity of analyses, results from similar studies, and other relevant evidence.                                                  | 14                      |
| 55 |                   |                      |                                                                                                                                                                                                                   |                         |
| 56 |                   |                      |                                                                                                                                                                                                                   |                         |
| 57 |                   |                      |                                                                                                                                                                                                                   |                         |
| 58 |                   |                      |                                                                                                                                                                                                                   |                         |
| 59 |                   |                      |                                                                                                                                                                                                                   |                         |
| 60 |                   |                      |                                                                                                                                                                                                                   |                         |

|    |                    |                     |                                                                        |    |
|----|--------------------|---------------------|------------------------------------------------------------------------|----|
| 1  | Generalisability   | <a href="#">#21</a> | Discuss the generalisability (external validity) of the study results  | 14 |
| 2  |                    |                     |                                                                        |    |
| 3  | <b>Other</b>       |                     |                                                                        |    |
| 4  | <b>Information</b> |                     |                                                                        |    |
| 5  |                    |                     |                                                                        |    |
| 6  |                    |                     |                                                                        |    |
| 7  | Funding            | <a href="#">#22</a> | Give the source of funding and the role of the funders for the present | 15 |
| 8  |                    |                     | study and, if applicable, for the original study on which the present  |    |
| 9  |                    |                     | article is based                                                       |    |
| 10 |                    |                     |                                                                        |    |
| 11 |                    |                     |                                                                        |    |

## Notes:

- 7: 7-8, table 1
- 12a: table 2, legend
- 14a: 9-12, table 2, figure 2
- 14c: 9-12, figure 1
- 16a: 9-12, table 2 The STROBE checklist is distributed under the terms of the Creative Commons Attribution License CC-BY. This checklist was completed on 08. November 2020 using <https://www.goodreports.org/>, a tool made by the [EQUATOR Network](#) in collaboration with [Penelope.ai](#)

# BMJ Open

## Cohort profile: Actionable Register of Geneva Out- and inpatients with SARS-CoV-2

|                                 |                                                                                                                                                                                                                                                                                                                                                                                                                                                                                                                                                                                                                                                                                                                                                                                                                                                                                                                                                                                                                                                                                                                                                                                                                                                                                                                                                                                                                                                                                                                                                                                                                                                                                                                                                                                         |
|---------------------------------|-----------------------------------------------------------------------------------------------------------------------------------------------------------------------------------------------------------------------------------------------------------------------------------------------------------------------------------------------------------------------------------------------------------------------------------------------------------------------------------------------------------------------------------------------------------------------------------------------------------------------------------------------------------------------------------------------------------------------------------------------------------------------------------------------------------------------------------------------------------------------------------------------------------------------------------------------------------------------------------------------------------------------------------------------------------------------------------------------------------------------------------------------------------------------------------------------------------------------------------------------------------------------------------------------------------------------------------------------------------------------------------------------------------------------------------------------------------------------------------------------------------------------------------------------------------------------------------------------------------------------------------------------------------------------------------------------------------------------------------------------------------------------------------------|
| Journal:                        | <i>BMJ Open</i>                                                                                                                                                                                                                                                                                                                                                                                                                                                                                                                                                                                                                                                                                                                                                                                                                                                                                                                                                                                                                                                                                                                                                                                                                                                                                                                                                                                                                                                                                                                                                                                                                                                                                                                                                                         |
| Manuscript ID                   | bmjopen-2021-048946.R1                                                                                                                                                                                                                                                                                                                                                                                                                                                                                                                                                                                                                                                                                                                                                                                                                                                                                                                                                                                                                                                                                                                                                                                                                                                                                                                                                                                                                                                                                                                                                                                                                                                                                                                                                                  |
| Article Type:                   | Cohort profile                                                                                                                                                                                                                                                                                                                                                                                                                                                                                                                                                                                                                                                                                                                                                                                                                                                                                                                                                                                                                                                                                                                                                                                                                                                                                                                                                                                                                                                                                                                                                                                                                                                                                                                                                                          |
| Date Submitted by the Author:   | 26-Jun-2021                                                                                                                                                                                                                                                                                                                                                                                                                                                                                                                                                                                                                                                                                                                                                                                                                                                                                                                                                                                                                                                                                                                                                                                                                                                                                                                                                                                                                                                                                                                                                                                                                                                                                                                                                                             |
| Complete List of Authors:       | <p>Genecand, Camille; Republic and Canton of Geneva Directorate of Health, Division of General Surgeon; Geneva University Hospitals, Division of Primary Care Medicine, Department of Community Medicine and Primary Care and Emergency Medicine</p> <p>Mongin, Denis; Republic and Canton of Geneva Directorate of Health, Division of General Surgeon</p> <p>Koegler, Flora; Geneva University Hospital, Department of Internal Medicine</p> <p>Lebowitz, Dan; Geneva University Hospitals, Infection Control Program</p> <p>Regard, Simon; Republic and Canton of Geneva Directorate of Health, Division of General Surgeon; Geneva University Hospitals, Department of Acute Medicine</p> <p>Nehme, Mayssam; Hôpitaux Universitaires de Genève, Primary Care Division</p> <p>Braillard, Olivia; Geneva University Hospital, Division of Primary Care Medicine, Department of Community Medicine and Primary Care and Emergency Medicine</p> <p>Gira, Marwene; University Hospitals of Geneva Department of Community Medicine and First Aid and Emergencies, Division of Primary Care Medicine</p> <p>Joubert, Dominique; Geneva University Hospitals, Quality of Care Service</p> <p>Chopard, Pierre; University Hospitals of Geneva, Quality of Care Service</p> <p>Delaporte, Elisabeth; Republic and Canton of Geneva Directorate of Health, Division of General Surgeon</p> <p>Stirnemann, Jerome; Geneva University Hospitals, Department of internal medicine</p> <p>Guessous, Idris; University Hospitals of Geneva, Community medicine, primary care and emergency</p> <p>Tardin, Aglaé; Republic and Canton of Geneva Directorate of Health, Division of General Surgeon</p> <p>Courvoisier, Delphine; Geneva University Hospitals, Division of clinical epidemiology</p> |
| <b>Primary Subject Heading</b>: | Epidemiology                                                                                                                                                                                                                                                                                                                                                                                                                                                                                                                                                                                                                                                                                                                                                                                                                                                                                                                                                                                                                                                                                                                                                                                                                                                                                                                                                                                                                                                                                                                                                                                                                                                                                                                                                                            |
| Secondary Subject Heading:      | Public health                                                                                                                                                                                                                                                                                                                                                                                                                                                                                                                                                                                                                                                                                                                                                                                                                                                                                                                                                                                                                                                                                                                                                                                                                                                                                                                                                                                                                                                                                                                                                                                                                                                                                                                                                                           |
| Keywords:                       | COVID-19, Public health < INFECTIOUS DISEASES, Epidemiology < INFECTIOUS DISEASES                                                                                                                                                                                                                                                                                                                                                                                                                                                                                                                                                                                                                                                                                                                                                                                                                                                                                                                                                                                                                                                                                                                                                                                                                                                                                                                                                                                                                                                                                                                                                                                                                                                                                                       |



1  
2  
3  
4  
5  
6  
7  
8  
9  
10  
11  
12  
13  
14  
15  
16  
17  
18  
19  
20  
21  
22  
23  
24  
25  
26  
27  
28  
29  
30  
31  
32  
33  
34  
35  
36  
37  
38  
39  
40  
41  
42  
43  
44  
45  
46  
47  
48  
49  
50  
51  
52  
53  
54  
55  
56  
57  
58  
59  
60

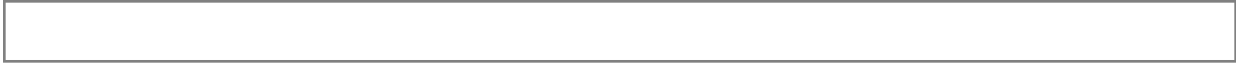

SCHOLARONE™  
Manuscripts

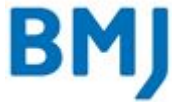

I, the Submitting Author has the right to grant and does grant on behalf of all authors of the Work (as defined in the below author licence), an exclusive licence and/or a non-exclusive licence for contributions from authors who are: i) UK Crown employees; ii) where BMJ has agreed a CC-BY licence shall apply, and/or iii) in accordance with the terms applicable for US Federal Government officers or employees acting as part of their official duties; on a worldwide, perpetual, irrevocable, royalty-free basis to BMJ Publishing Group Ltd ("BMJ") its licensees and where the relevant Journal is co-owned by BMJ to the co-owners of the Journal, to publish the Work in this journal and any other BMJ products and to exploit all rights, as set out in our [licence](#).

The Submitting Author accepts and understands that any supply made under these terms is made by BMJ to the Submitting Author unless you are acting as an employee on behalf of your employer or a postgraduate student of an affiliated institution which is paying any applicable article publishing charge ("APC") for Open Access articles. Where the Submitting Author wishes to make the Work available on an Open Access basis (and intends to pay the relevant APC), the terms of reuse of such Open Access shall be governed by a Creative Commons licence – details of these licences and which [Creative Commons](#) licence will apply to this Work are set out in our licence referred to above.

Other than as permitted in any relevant BMJ Author's Self Archiving Policies, I confirm this Work has not been accepted for publication elsewhere, is not being considered for publication elsewhere and does not duplicate material already published. I confirm all authors consent to publication of this Work and authorise the granting of this licence.

1  
2  
3  
4  
5  
6  
7  
8  
9  
10  
11  
12  
13 **Cohort profile:**

14  
15 **Actionable Register of Geneva Out- and inpatients with SARS-CoV-2**

16  
17  
18 **(ARGOS)**

19  
20  
21  
22  
23  
24  
25  
26 Camille Genecand\*<sup>1,4</sup>, Denis Mongin<sup>1</sup>, Flora Koegler<sup>2</sup>, Dan Lebowitz<sup>3</sup>, Simon Regard<sup>1,6</sup>,  
27  
28 Mayssam Nehme<sup>4</sup>, Olivia Braillard<sup>4</sup>, Marwène Grira<sup>4</sup>, Dominique Joubert<sup>5</sup>, Pierre  
29  
30 Chopard<sup>5</sup>, Elisabeth Delaporte<sup>1</sup>, Jerome Stirnemann<sup>2</sup>, Idris Guessous<sup>4</sup>, Aglaé Tardin<sup>1</sup>,  
31  
32 Delphine S. Courvoisier<sup>5</sup>  
33  
34  
35  
36  
37  
38  
39  
40  
41  
42  
43  
44  
45  
46  
47

---

48 **\* Corresponding author**

49 [camille.genecand@etat.ge.ch](mailto:camille.genecand@etat.ge.ch)

50 Division of General Surgeon,  
51 Geneva Directorate of Health,  
52 Rue Adrien-Lachenal 8,  
53 CH-1207, Geneva, Switzerland  
54  
55  
56  
57  
58  
59  
60

**Authors affiliations:**

<sup>1</sup>Division of General Surgeon, Geneva Directorate of Health, Geneva, Switzerland;

<sup>2</sup>Division of General Internal Medicine, Department of Internal Medicine, Geneva

University Hospital, Geneva, Switzerland; <sup>3</sup>Infection Control Program, University of

Geneva Hospitals and Faculty of Medicine, University of Geneva, Geneva, Switzerland;

<sup>4</sup>Division of Primary Care Medicine, Department of Community Medicine and Primary

Care and Emergency Medicine, Geneva University Hospital, Geneva, Switzerland;

<sup>5</sup>Quality of Care Service, University Hospital of Geneva, Geneva, Switzerland; <sup>6</sup>Division

of Emergency Medicine, Department of Acute Medicine, Geneva University Hospital,

Geneva, Switzerland.

## Abstract:

### **Purpose**

The Actionable Register of Geneva Out- and inpatients with SARS-CoV-2 (ARGOS) is an ongoing prospective cohort created by the Geneva Directorate of Health (GDH). It consists of an operational database compiling all SARS-CoV-2 test results conducted in the Geneva area since late February 2020. This article aims at presenting this comprehensive cohort, in light of some of the varying public health measures in Geneva, Switzerland, since March 2020.

### **Participants**

As of June 1st, 2021, the database included 356'868 patients, among which 65'475 had at least one positive test result for SARS-CoV-2. Among all positive patients, 37.6% were contacted only once, 10.6 % had one follow-up call, 8.5% had two, and 27.7% had 3 or more follow-up calls. Participation rate among positive patients is 94%. Data collection is ongoing.

### **Findings to date**

ARGOS data illustrates the magnitude of COVID-19 pandemic in Geneva, Switzerland, and details a variety of population factors and outcomes. The content of the cohort includes demographic data, comorbidities and risk factors for poor clinical outcome, self-reported COVID-19 symptoms, environmental and socio-economic factors, prospective and retrospective contact tracing data, travel quarantine data, and deaths. The registry

1  
2  
3 has already been used in several publications focusing on symptoms and long COVID,  
4  
5 infection fatality rate, and re-infection.  
6  
7

### 8 9 **Future plans:**

10  
11  
12 The data of this large real-world registry provides a valuable resource for various types  
13  
14 of research, such as clinical research, epidemiological research or policy assessment as  
15  
16 it illustrates the impact of public health policies and overall disease burden of COVID-19.  
17  
18  
19

### 20 **STRENGTHS AND LIMITATIONS OF THIS STUDY**

- 21  
22
- 23 • ARGOS' main strength consists of its large number of cases, representative of all  
24  
25 diagnosed cases on a regional level with the primary aim of assessing all cases.  
26  
27
  - 28 • ARGOS involves every individual who performed a SARS-CoV-2 test (PCR or  
29  
30 antigenic) and is not limited to hospitalized patients, thus providing a valuable  
31  
32 resource to assess the overall disease burden of COVID-19 in a geographically  
33  
34 defined population.  
35  
36
  - 37 • To mitigate confounding effects and improve data analysis and interpretation, we  
38  
39 present the data according to four policy periods.  
40  
41
  - 42 • This cohort is multicentric as it includes all tests performed in Geneva's hospitals  
43  
44 (both public and private), private practices and medical centers.  
45  
46
  - 47 • Due to operational needs, symptoms and comorbidities are self-reported, which may  
48  
49 lead to measurement error or misclassification.  
50  
51

52 Text word count: 3140 words  
53  
54  
55  
56  
57  
58  
59  
60

## Introduction

In December 2019, an increasing number of cases of pneumonia caused by a novel coronavirus, SARS-CoV-2<sup>1</sup>, was observed in Wuhan, China. On March 11, 2020, the World Health Organization (WHO) declared the coronavirus disease 2019 (COVID-19) outbreak a global pandemic(1,2). As of June 1st, 2021, the virus spread to 207 countries, infected close to 171 million people and caused 3.68 million deaths(3,4). In Switzerland, the cumulative incidence of laboratory confirmed COVID-19<sup>2</sup> cases during the first wave was in the top five countries in Europe, with about 400 confirmed cases per 100'000 population at the end of July 2020(4,5). In the Geneva area, the first COVID-19<sup>2</sup> patient was diagnosed on February 26, 2020(6). Possibly due to the city's geographical proximity to Northern Italy(7), the epidemic curve showed a steep upward trend. The first wave of the epidemic peaked in Geneva on April 2nd with 233 cases in 24 hours in an area with a population of 500'000. Geneva's cumulative incidence of confirmed cases is almost 3 times that of Switzerland(5), with more than 1'000 cases per 100'000 population(6), while the seroprevalence was estimated to be close to 10 times that of the confirmed cases as 9.7% of the population had antibodies three weeks after the height of the epidemic(8,9).

A database was created in early March in order to contact new cases and keep track of their follow-up. The Actionable Register of Geneva Out- and inpatients with SARS-CoV-

---

<sup>1</sup> Severe acute respiratory syndrome coronavirus 2

<sup>2</sup> coronavirus disease 2019

1  
2  
3 2<sup>1</sup> (ARGOS) includes all SARS-CoV-2<sup>1</sup> test results conducted in the Geneva area since  
4  
5 late February 2020, as well as those from Geneva residents being tested in other Swiss  
6  
7 cantons. After more than a year of pandemic and guided by operational needs, ARGOS  
8  
9 has been enriched by various data, including contact tracing information. The primary  
10  
11 aim of this article is to present this comprehensive cohort, its characteristics and the  
12  
13 content of the data collected. The secondary aim is to interpret the data according to the  
14  
15 public health measures implemented over time since the cohort profile was influenced  
16  
17 by the varying policies enacted by the Swiss government and the Geneva State.  
18  
19  
20  
21  
22

## 23 Cohort description

### 24 The ARGOS database

25  
26  
27 ARGOS is an ongoing prospective cohort created by the Geneva Directorate of Health  
28  
29 (GDH) and consists of an operational database compiling all SARS-CoV-2 test results  
30  
31 conducted in the Geneva canton. Data are collected and managed using the REDCap  
32  
33 electronic data capture tools(10,11) allowing the GDH to contact positive cases in order  
34  
35 to promote public health measures and coordinate medical follow-up. It is set up as a  
36  
37 collaborative tool between different institutions and medical entities, including the GDH,  
38  
39 Geneva University Hospitals (HUG), and Geneva's main private medical centers. The  
40  
41 latter have restricted access to data regarding their own patients only. The GDH and HUG  
42  
43 are the only users to implement follow-up data in the electronic register. The data is  
44  
45 hosted on HUG's secure servers. The register is administered by a committee of co-  
46  
47 Principal Investigators belonging to the GDH and HUG, with the agreement of the  
48  
49 cantonal ethic committee (CCER protocol 2020-01273). Participants in the database had  
50  
51  
52  
53  
54  
55  
56  
57  
58  
59  
60



1  
2  
3 the opportunity to refuse to participate in the registry, and those who did are excluded  
4 from the analyses presented here and any data sharing. The participation rate for positive  
5 patients is 93.9% (calculated as the ratio between the number of patients who gave their  
6 consent for the reuse of their data and the total number of patients). As recommended by  
7 the World Health Organization, deidentified ARGOS data are made available upon  
8 reasonable request, including a research protocol, using the [form](https://edc.hcuge.ch/surveys/?s=TLT9EHE93C)  
9 <https://edc.hcuge.ch/surveys/?s=TLT9EHE93C>.

### 20 Data collection

21  
22 All Geneva laboratories performing SARS-CoV-2 testing are required to send the results  
23 to the GDH. Swabs are collected from the upper respiratory tract in medical centers,  
24 private practice or during home visits by trained healthcare professionals(12). Between  
25 January 24, 2020 and June 1st, 2021, 655'464 tests for SARS-CoV-2 recorded in the  
26 ARGOS database, 584'512 were performed by real-time reverse transcriptase–  
27 polymerase chain reaction assays and 70'952 by rapid antigen tests. The majority were  
28 performed in the Geneva area and a small number consisted of tests conducted on  
29 Geneva residents in other Swiss Cantons, and declared to the GDH by the Federal  
30 Office of Public Health (FOPH). Importantly, patients reporting COVID-19 symptoms  
31 between March 13 and March 29, 2020, did not get tested due to shortage of testing  
32 materials, unless they were healthcare workers, considered at-risk or hospitalized.  
33 However, symptomatic patients who visited the HUG COVID-19 testing center without  
34 fulfilling testing criteria were entered in the database as “suspected cases”. Some of  
35 these patients later received a test as policy evolved on March 30, 2020. For each  
36 positive or suspect case, a series of surveys is filled using REDCap platform.  
37  
38  
39  
40  
41  
42  
43  
44  
45  
46  
47  
48  
49  
50  
51  
52  
53  
54  
55  
56  
57  
58  
59  
60

1  
2  
3 Depending on the needs, follow-up calls are performed either by a professional nurse, a  
4 medical student or a contact tracer with supervision from a medical doctor. Findings are  
5 documented in the database. 669 patients from the cohort were also called back at 6  
6 week and 7 months to monitor the persistence of symptoms, of which 510 and 410  
7 answered respectively. All SARS-CoV-2 positive patients in Geneva who require  
8 hospitalization at HUG received follow-up calls by the HUG team at the time of  
9 discharge from the hospital. COVID-19 positive patients identified as nursing home  
10 residents or who are hospitalized at the time of diagnosis are not systematically called  
11 since they already receive medical attention and isolation measures are enforced by the  
12 medical staff. During the second wave, which started in late September 2020, the  
13 incidence of SARS-CoV-2 positive patients became so high that the GDH team could  
14 not contact everyone in time. A semi-automatic process was put in place. Positive  
15 patients and their declared contacts received an invitation to an online survey where  
16 they filled basic information. Only then and when the workload allowed it, they received  
17 a phone call from the GDH team to complete the data already provided. At the peak of  
18 the second wave, not all SARS-CoV-2 positive patients could be contacted. Follow-up  
19 calls as well as calls to close contacts were also temporarily abandoned. Finally, the  
20 Geneva Cantonal Population Office are required to declare COVID-19 related deaths,  
21 which are also recorded in ARGOS. Patients or the public were not involved in  
22 research.

### 23 24 25 26 27 28 29 30 31 32 33 34 35 36 37 38 39 40 41 42 43 44 45 46 47 48 49 50 51 52 53 54 55 56 57 58 59 60

### What is being measured?

An overview of collected data is provided in Table 1. The surveys were created by the  
GDH and HUG medical task forces. Within the first 48h of testing, patients with a

1  
2  
3 positive test result for COVID-19 receive a call by a professional nurse or a trained  
4  
5 contact tracer with support from a medical doctor if needed. During this call,  
6  
7 demographic data are collected (13), as well as symptoms (14–17), clinical and  
8  
9 environmental risk factors, and clinical red flags. A special attention is paid to  
10  
11 psychosocial and cultural factors, and resources are provided when needed. The  
12  
13 clinical evaluation is used to identify patients who need immediate emergency care, or  
14  
15 to address them for follow-up care by their general practitioner, by one of Geneva's  
16  
17 medical centers, or by the GDH-HUG team via telemedicine, which is recorded in the  
18  
19 database as well. Patients' declared symptoms are recorded in subsequent surveys.  
20  
21 Patients' self-reported compliance to isolation measures are also recorded. As of April  
22  
23 27, 2020, close contacts of index cases are individually contacted and basic information  
24  
25 is recorded. Demographics, the type of contact they had with the index case, vaccine  
26  
27 information, the presence of COVID-19 symptoms and their compliance to quarantine  
28  
29 measures are also recorded at first call and during follow-up calls. Since July 6, 2020,  
30  
31 the FOPH has established an evolving red list of countries where incidence rate is  
32  
33 considered high or with variant of concern. Travelers who stayed in one of these  
34  
35 countries have to quarantine for 10 days at their arrival in Switzerland. People staying in  
36  
37 Geneva must self-declare upon arrival and fill an online survey containing basic  
38  
39 information which data is also part of ARGOS. Depending of the work load, travelers are  
40  
41 called by contact tracers during their quarantine period. Self-reported compliance to  
42  
43 quarantine measures and the presence of symptoms are recorded during these calls.  
44  
45  
46  
47  
48  
49  
50  
51  
52

## 53 Findings to date

54  
55  
56  
57  
58  
59  
60

1  
2  
3 On June 1<sup>st</sup>, 2021, of all 360'525 patients recorded in the ARGOS database, 65'475 had  
4 at least one positive test result, 294'723 had one or more negative test results and no  
5 positive one, and 327 were suspected COVID-19 cases without a positive test to  
6 confirm the disease. During the same period, 655527 tests were performed, among  
7 which 89.2% were PCR. The positivity, i.e. the ratio between the positive tests and the  
8 total amount of tests, was of 10.7%. Among the positive patients, 4'687 persons did not  
9 allow their data to be used for research and were excluded from analyses. The  
10 remaining number of positive cases available for analysis is 60'788. Of these patients,  
11 37.6% have only a first contact, 10.6% and 8.5% have one and two follow-up call  
12 respectively, and 27.7% of participants have three or more follow-up calls. 15.7% of the  
13 patients were not contacted, mainly during the periods of active pandemic activity when  
14 the GDH team was overworked (see Table 2). The cohort shows a slight female  
15 predominance, with women representing 50.2% to 55.9% of all patients depending on  
16 the defined period (Table 2). More than 60 percent of all recorded patients have no risk  
17 factor for a poor clinical outcome(18). The context of infection recorded for COVID19  
18 positive patients since June 2020 indicates that infection mostly occurs at home, at work  
19 or via the educational system. Around 23.2% of the patient reported having no idea of  
20 their contamination context. Information about 114'690 close contacts of positive  
21 patients has been registered, and 639'153 days of quarantine have been notified. 9'551  
22 close contacts of a positive COVID19 case had a positive test result during their  
23 quarantine. Given that the standard duration of a quarantine is 10 days, we can  
24 estimate that around 15% of the persons in quarantine after being in contact with a  
25  
26  
27  
28  
29  
30  
31  
32  
33  
34  
35  
36  
37  
38  
39  
40  
41  
42  
43  
44  
45  
46  
47  
48  
49  
50  
51  
52  
53  
54  
55  
56  
57  
58  
59  
60

1  
2  
3 positive COVID19 case received a positive test result during their quarantine (see table  
4  
5  
6 2).

7  
8  
9 273'189 days of quarantine concerning 27920 persons were ordered for persons  
10  
11 coming back from a country at risk. These country were in order of importance Spain  
12  
13 (19.4%), France (14.8%), Kosovo (7.6%), United States (7.0%), United Kingdom  
14  
15 (7.0%), Portugal (6.2%) and Brazil (4.2%). 96 persons received a positive test result  
16  
17 during their quarantine, among which 26 came back from Kosovo, 11 from France and  
18  
19 10 from Spain, the total of these infection occurring in 0.35% of the quarantines.  
20  
21

22  
23 To mitigate confounding effects and improve data analysis and interpretation, we  
24  
25 present the data according to four periods (see Figure 1).  
26  
27

#### 28 29 February 26 to April 27, 2020 (first phase) 30 31

32 The first phase starts on February 26, 2020, when the first case was tested positive for  
33  
34 SARS-CoV-2 in the Geneva area. The Swiss authorities implemented lockdown  
35  
36 measures which remained moderate in comparison with many other countries (19). This  
37  
38 first phase ends on April 27, 2020, when some of the measures started to be lifted  
39  
40 following the decreasing incidence of new cases and hospitalizations. During this first  
41  
42 wave, contact tracing was not implemented. Between March 13 and March 29, 2020,  
43  
44 symptomatic individuals did not get tested due to shortage of testing materials, unless  
45  
46 they were healthcare workers, considered at-risk or hospitalized. The percentage of  
47  
48 healthcare professionals among positive cases was significantly higher during this  
49  
50 phase (15.6%) and the percentage of patients declaring no risk factors was smaller  
51  
52  
53  
54  
55  
56  
57  
58  
59  
60

1  
2  
3 (32.4%) when compared to the other phases. The positivity (i.e. the ratio between  
4  
5 positive tests results and the total amount of test performed) was of 23%.  
6  
7

#### 8 9 April 28 to September 24, 2020 (second phase) 10

11 Between May and the end of September, 2020, incidence of SARS-CoV-2 positive  
12 cases remained low. Nearly all restrictions were lifted at the end of June. Nightclubs  
13 were closed again at the end of July after a surge of incidence mostly amongst Geneva  
14 youth, as can be seen by the relative higher incidence of the 20-39 year age category  
15 compared to the others during this period (Figure 2). 14.1% of the positive tests during  
16 this period were stemming from screening campaigns and more than 70% of cases  
17 reported no risk factor. The positivity was only 4.6% during this period.  
18  
19  
20  
21  
22  
23  
24  
25  
26  
27  
28

#### 29 September 24, 2020 to February 28, 2021 (third phase) 30

31 A second wave of SARS-CoV-2 positive cases hit Geneva in late September, 2020, at  
32 the same time as in the neighboring countries. New restrictions were imposed mid-  
33 October but no real lockdown was enacted. The peak lasted about 8 weeks. Due to  
34 political and economic pressure, some restrictions measures were lifted long before  
35 incidence reached low level. The number of SARS-CoV-2 positive cases in Geneva  
36 area remained significant during several months. During February 2021, the B.1.1.7  
37 variant completely replaced SARS-CoV-2 wild type . At the same time, federal and local  
38 policies evolved and testing among symptomatic children over 5 years old was newly  
39 encouraged. Concurrently with these changes, the incidence of the 0-19 year age  
40 population almost doubled to reach those of the older age categories (19–21). The  
41 positivity during this period was 15.9%.  
42  
43  
44  
45  
46  
47  
48  
49  
50  
51  
52  
53  
54  
55  
56  
57  
58  
59  
60

1  
2  
3 As of February 8<sup>th</sup>, 2021, quarantine measures for close contacts were lifted after 7  
4 days if the person tested negative for SARS-CoV-2. Concurrently, the percentage of  
5 close contacts tested positive increased (see table 2). Considering vaccination program,  
6 the first dose of vaccine in Geneva was given to an elderly patient the 28<sup>th</sup> December  
7 2020. At first, only residents over 74 years old and patients with risk factors received  
8 vaccination. The decline of the incidence for people of the corresponding age category  
9 compared to the others can be observed since February 2021 in figure 2.  
10  
11  
12  
13  
14  
15  
16  
17  
18  
19

### 20 21 **March 1<sup>st</sup> to 1<sup>st</sup> June, 2021 (fourth phase)**

22 On March 1<sup>st</sup>, access to vaccination continued to broaden. Resident over 65 years were  
23 allowed to be vaccinated since March 17, 2021, followed by the 45-65 year old  
24 residents starting at April 12, 2021. By 19 May, 2021, all Geneva residents over 15  
25 years old were eligible to get vaccinated. The incidence COVID among the 65-79 year  
26 old population started to decline by end of March (figure 2), followed by a rapid decline  
27 of the incidence overall by mid-May. The amount of screening tests increased, as 21%  
28 of the positive tests were performed during a screening campaign. The positivity  
29 decreased to 5.2% during this period.  
30  
31  
32  
33  
34  
35  
36  
37  
38  
39  
40  
41

### 42 **Discussion**

43  
44 COVID-19 represents a major challenge to each country's healthcare system.  
45  
46 Collaboration between healthcare providers and public health authorities is particularly  
47 important in order to improve both our understanding of the disease and our  
48 response(22–24). The publication of the ARGOS cohort underscores our willingness to  
49 share data for research purposes. Indeed, data from this registry has already been used  
50  
51  
52  
53  
54  
55  
56  
57  
58  
59  
60

1  
2  
3 to investigate symptoms and long COVID (25), infection fatality rate (9), and re-infection  
4 rates (26), as well as viral load kinetics (27). Several projects using these data to  
5  
6 develop more accurate mathematical models to estimate transmission chains are also  
7  
8 ongoing.  
9  
10

11  
12  
13 Furthermore, analysis from the ARGOS database illustrates the impact of various  
14 testing policies on the proportion of risk factors or age groups identified among  
15 confirmed cases. The partition of data analysis and interpretation according to policy  
16 period confirms the variations within each group depending on the period of interest and  
17  
18 could thus guide public health decisions.  
19  
20  
21  
22  
23

## 24 25 26 Strength and limitations 27

28  
29 The state of Geneva accounts for half a million residents and the local Directorate of  
30 Health ordered the recording of all COVID-19 positive cases since the beginning of the  
31 epidemic, according to recommendations from the Federal Office of Public Health. Due  
32 to this policy, the database's main strength consists of its large number of cases,  
33 representative of all diagnosed cases on a regional level primarily serving operational  
34 needs and not scientific purposes, with one main objective: assessing all cases. This  
35 cohort is also multicentric as it includes all tests performed in Geneva's hospitals (both  
36 public and private), private practices and medical centers. The fact that a very large  
37 proportion of all cases are assessed reduces the risk of biased data. Also, as data is  
38 recorded on the day of the call to the patient, recall bias is very low. Finally, the  
39 ARGOS<sup>3</sup> database is characterized by a high number of follow-ups.  
40  
41  
42  
43  
44  
45  
46  
47  
48  
49  
50  
51  
52  
53  
54  
55  
56  
57  
58  
59  
60



1  
2  
3 Despite these strengths, ARGOS has been influenced by the testing policy and the  
4 results must be seen in light of these influences. First, individuals without risk factors for  
5 COVID-19 and those younger than 65 years old are underrepresented in the database  
6 during the testing restriction period. The shapes of the graphics in Figure 1 and 2  
7 confirm the impact of this policy as there is a sudden decrease in number of cases after  
8 March 20, 2020, when restriction started. Other factors could have amplified this  
9 phenomenon such as less symptomatic forms of disease in younger people and  
10 children. Reasons to get tested have also evolved over the first months of the epidemic.  
11 For example, anosmia or ageusia became a testing criteria only in late April. Patients  
12 who presented with these isolated symptoms within the first two months of the epidemic  
13 could thus have been undertested. Seroprevalence study results confirm the  
14 underrepresentation of certain groups and the undertesting of the overall population (8).  
15  
16 Nevertheless, ARGOS has several limitations. First, measurement error due to lack of  
17 detail of some variables can be observed, since efficiency was prioritized over detail-  
18 oriented data collection. For instance, individuals' level of education is not recorded.  
19 Secondly, misclassification also certainly occurs as symptoms and risk factors are self-  
20 reported. Moreover, recording of information in ARGOS is performed by a large and  
21 evolving team of professionals, including healthcare workers with various backgrounds,  
22 medical students, police recruits, or contact tracers with no particular medical and  
23 health knowledge. Due to the crisis situation, training contents delivered to the GDH  
24 team often evolved, leading to a certain level of heterogeneity of phone interviews and a  
25 greater risk for misclassification of medical information. Thirdly, the patient information  
26 gathered is tailored to operational needs and growing scientific knowledge. For  
27  
28  
29  
30  
31  
32  
33  
34  
35  
36  
37  
38  
39  
40  
41  
42  
43  
44  
45  
46  
47  
48  
49  
50  
51  
52  
53  
54  
55  
56  
57  
58  
59  
60

1  
2  
3 example, anosmia and ageusia were initially classified as general ENT symptoms, and  
4  
5 were later detailed separately as they were recognized as frequent and specific  
6  
7 manifestations of COVID-19 (28). Finally, during some periods of the pandemic, the  
8  
9 GDH team was overworked and could not call not verify self-reported information for all  
10  
11 positive cases. This resulted in missing and incomplete data.  
12  
13  
14

15  
16 In conclusion, ARGOS is a large, real-world registry of individuals tested for SARS-  
17  
18 Cov2<sup>1</sup>. Unlike many other registries, it involves every tested individual and is not limited  
19  
20 to hospitalized patients, thus providing a precious resource to assess the impact of  
21  
22 public health policies and overall disease burden of COVID-19.  
23  
24  
25

## 26 Collaboration

27  
28  
29 The publication of the ARGOS cohort underscores our willingness to share data for  
30  
31 research purposes and for optimizing public health measures. Deidentified ARGOS data  
32  
33 are available upon reasonable request, including a research protocol, using the following  
34  
35 form: <https://edc.hcuge.ch/surveys/?s=TLT9EHE93C> .  
36  
37  
38  
39

## 40 Further details

### 41 Data sharing statement

42  
43  
44  
45  
46  
47 The deidentified data underlying this article will be shared on reasonable request using  
48  
49 the form (<https://edc.hcuge.ch/surveys/?s=TLT9EHE93C>)  
50  
51  
52  
53  
54  
55  
56  
57  
58  
59  
60

### Ethics approval

Research received the agreement of the Cantonal Ethic Committee of Geneva (CCER protocol 2020-01273).

### Funding

ARGOS is supported by Geneva State public funds and the research project SELFISH financed by the Swiss National Science Foundation LIVES, grant number 51NF40-160590.

### Acknowledgements

We thank all members of the COVID-19 team at the General Directorate of Health, as well as all healthcare providers and laboratories involved in the management of COVID-19 patients. We also wish to thank all patients and their contacts who are included in the ARGOS database.

### Conflicts of interest

The authors declare no conflict of interest.

### Authors contribution

Each author contributed to this article, based on the criteria of the International Committee for Medical Journal Editors. Camille Genecand conceptualized, designed the article format, interpreted the data, and conducted the literature review. Denis Mongin conducted the data analysis and participated in its formulation and its interpretation in the text. Flora Koegler conceptualized and designed the article format, interpreted the data, and conducted the literature review. Dan Lebowitz participated to the article design and reviewed it. Delphine Courvoisier designed the study's analytic strategy, reviewed the article, and revisited it critically. Simon Regard, Pierre Chopard, Marwène Grira, Elisabeth

1  
2  
3 Delaporte, Mayssam Nehme, Olivia Braillard, Dominique Joubert, Idris Guessous,  
4  
5 Jerome Stirnemann and Aglaé Tardin helped acquisition of data and reviewed the article's  
6  
7 content critically.  
8  
9  
10  
11  
12  
13  
14  
15  
16  
17  
18  
19  
20  
21  
22  
23  
24  
25  
26  
27  
28  
29  
30  
31  
32  
33  
34  
35  
36  
37

### 38 **References:**

- 39  
40  
41 1. Cucinotta D, Vanelli M. WHO Declares COVID-19 a Pandemic. *Acta Bio-Medica*  
42 *Atenei Parm.* 2020;91(1):157–160.  
43
- 44 2. Coronaviridae Study Group of the International Committee on Taxonomy of  
45 Viruses. The species Severe acute respiratory syndrome-related coronavirus:  
46 classifying 2019-nCoV and naming it SARS-CoV-2. *Nat. Microbiol.* 2020;5(4):536–  
47 544.  
48
- 49 3. Dong E, Du H, Gardner L. An interactive web-based dashboard to track COVID-19  
50 in real time. *Lancet Infect. Dis.* 2020;20(5):533–534.  
51  
52
- 53 4. Roser M, Ritchie H, Ortiz-Ospina E, et al. Coronavirus Pandemic (COVID-19). *Our*  
54 *World Data* [electronic article]. 2020;(https://ourworldindata.org/coronavirus).  
55 (Accessed August 2, 2020)  
56  
57

- 1
  - 2
  - 3
  - 4
  - 5
  - 6
  - 7
  - 8
  - 9
  - 10
  - 11
  - 12
  - 13
  - 14
  - 15
  - 16
  - 17
  - 18
  - 19
  - 20
  - 21
  - 22
  - 23
  - 24
  - 25
  - 26
  - 27
  - 28
  - 29
  - 30
  - 31
  - 32
  - 33
  - 34
  - 35
  - 36
  - 37
  - 38
  - 39
  - 40
  - 41
  - 42
  - 43
  - 44
  - 45
  - 46
  - 47
  - 48
  - 49
  - 50
  - 51
  - 52
  - 53
  - 54
  - 55
  - 56
  - 57
  - 58
  - 59
  - 60
5. OFSP. Rapport quotidien sur la situation épidémiologique en Suisse et dans la Principauté de Liechtenstein. 2020;(Rapport quotidien sur la situation épidémiologique en ... - BAG <https://www.bag.admin.ch/bag/covid-19-lagebericht.pdf.download.pdf>)
  6. DSES. COVID-19 - données complètes depuis le début de la pandémie. *GECH – Répub. Cant. Genève*. 2020;(https://www.ge.ch/document/covid-19-donnees-completes-debut-pandemie). (Accessed August 2, 2020)
  7. OFSP. Nouveau coronavirus COVID-19: premier cas confirmé en Suisse. 2020;(https://www.bag.admin.ch/bag/fr/home/das-bag/aktuell/medienmitteilungen.msg-id-78233.html). (Accessed August 2, 2020)
  8. Stringhini S, Wisniak A, Piumatti G, et al. Repeated seroprevalence of anti-SARS-CoV-2 IgG antibodies in a population-based sample from Geneva, Switzerland. *medRxiv*. 2020;2020.05.02.20088898.
  9. Perez-Saez J, Lauer SA, Kaiser L, et al. Serology-informed estimates of SARS-CoV-2 infection fatality risk in Geneva, Switzerland. *Lancet Infect. Dis*. 2020;
  10. Harris PA, Taylor R, Thielke R, et al. Research electronic data capture (REDCap)-- a metadata-driven methodology and workflow process for providing translational research informatics support. *J. Biomed. Inform.* 2009;42(2):377–381.
  11. Harris PA, Taylor R, Minor BL, et al. The REDCap consortium: Building an international community of software platform partners. *J. Biomed. Inform.* 2019;95:103208.
  12. Marty FM, Chen K, Verrill KA. How to Obtain a Nasopharyngeal Swab Specimen. *N. Engl. J. Med.* 2020;382(22):e76.
  13. Guan W, Ni Z, Hu Y, et al. Clinical Characteristics of Coronavirus Disease 2019 in China. *N. Engl. J. Med.* 2020;382(18):1708–1720.
  14. Vetter P, Vu DL, L’Huillier AG, et al. Clinical features of covid-19. *BMJ*. 2020;369:m1470.
  15. Huang C, Wang Y, Li X, et al. Clinical features of patients infected with 2019 novel coronavirus in Wuhan, China. *Lancet Lond. Engl.* 2020;395(10223):497–506.
  16. Giacomelli A, Pezzati L, Conti F, et al. Self-reported Olfactory and Taste Disorders in Patients With Severe Acute Respiratory Coronavirus 2 Infection: A Cross-sectional Study. *Clin. Infect. Dis. Off. Publ. Infect. Dis. Soc. Am.* 2020;71(15):889–890.
  17. Greenhalgh T, Koh GCH, Car J. Covid-19: a remote assessment in primary care. *BMJ*. 2020;368:m1182.

18. ECDC. Rapid risk assessment: Coronavirus disease 2019 (COVID-19) pandemic: increased transmission in the EU/EEA and the UK – eighth update. *Eur. Cent. Dis. Prev. Control.* 2020;(https://www.ecdc.europa.eu/en/publications-data/rapid-risk-assessment-coronavirus-disease-2019-covid-19-pandemic-eighth-update). (Accessed August 2, 2020)
19. Davies NG, Abbott S, Barnard RC, et al. Estimated transmissibility and impact of SARS-CoV-2 lineage B.1.1.7 in England. *Science* [electronic article]. 2021;372(6538). (https://science.sciencemag.org/content/372/6538/eabg3055). (Accessed June 20, 2021)
20. Volz E, Mishra S, Chand M, et al. Assessing transmissibility of SARS-CoV-2 lineage B.1.1.7 in England. *Nature.* 2021;593(7858):266–269.
21. Forbes H, Morton CE, Bacon S, et al. Association between living with children and outcomes from covid-19: OpenSAFELY cohort study of 12 million adults in England. *BMJ.* 2021;372:n628.
22. Islam N, Sharp SJ, Chowell G, et al. Physical distancing interventions and incidence of coronavirus disease 2019: natural experiment in 149 countries. *BMJ* [electronic article]. 2020;370. (https://www.bmj.com/content/370/bmj.m2743). (Accessed August 24, 2020)
23. Koo JR, Cook AR, Park M, et al. Interventions to mitigate early spread of SARS-CoV-2 in Singapore: a modelling study. *Lancet Infect. Dis.* 2020;20(6):678–688.
24. Baker MG, Wilson N, Anglemyer A. Successful Elimination of Covid-19 Transmission in New Zealand. *N. Engl. J. Med.* 2020;383(8):e56.
25. Nehme M, Braillard O, Alcoba G, et al. COVID-19 Symptoms: Longitudinal Evolution and Persistence in Outpatient Settings. *Ann. Intern. Med.* 2021;174(5):723–725.
26. Leidi A, Koegler F, Dumont R, et al. Risk of reinfection after seroconversion to SARS-CoV-2: A population-based propensity-score matched cohort study. *Clin. Infect. Dis. Off. Publ. Infect. Dis. Soc. Am.* 2021;ciab495.
27. Bellon M, Baggio S, Bausch FJ, et al. SARS-CoV-2 viral load kinetics in symptomatic children, adolescents and adults. *Clin. Infect. Dis. Off. Publ. Infect. Dis. Soc. Am.* 2021;ciab396.
28. Lechien JR, Chiesa-Estomba CM, De Siati DR, et al. Olfactory and gustatory dysfunctions as a clinical presentation of mild-to-moderate forms of the coronavirus disease (COVID-19): a multicenter European study. *Eur. Arch. Oto-Rhino-Laryngol. Off. J. Eur. Fed. Oto-Rhino-Laryngol. Soc. EUFOS Affil. Ger. Soc. Oto-Rhino-Laryngol. - Head Neck Surg.* 2020;277(8):2251–2261.

|                                                           |                                                                                                                                                                                                                                                                                                                                            |
|-----------------------------------------------------------|--------------------------------------------------------------------------------------------------------------------------------------------------------------------------------------------------------------------------------------------------------------------------------------------------------------------------------------------|
| <u>Test result</u>                                        | <ul style="list-style-type: none"> <li>– Positive</li> <li>– Negative</li> <li>– COVID-19 suspected, no test performed</li> <li>– COVID-19 suspected, negative test result</li> </ul>                                                                                                                                                      |
| <u>Test type</u>                                          | <ul style="list-style-type: none"> <li>– RT-PCR</li> <li>– Rapid antigen test</li> </ul>                                                                                                                                                                                                                                                   |
| <u>Reason for testing</u>                                 | <ul style="list-style-type: none"> <li>– Acute symptoms consistent with COVID-19</li> <li>– Screening, no symptoms</li> <li>– Screening in the workplace (no symptoms)</li> <li>– Screening based on Swisscovid notification (no symptoms)</li> <li>– Patient transfer between hospitals</li> </ul>                                        |
| <u>Demographics</u>                                       | <ul style="list-style-type: none"> <li>– Date of birth</li> <li>– Gender</li> <li>– Basic professional information</li> <li>– Personal and professional addresses</li> <li>– School information : <ul style="list-style-type: none"> <li>○ School address</li> <li>○ Name of class and professor</li> </ul> </li> </ul>                    |
| <u>Medical risk factors for COVID-19 negative outcome</u> | <ul style="list-style-type: none"> <li>– Cardiovascular disease</li> <li>– Hypertension</li> <li>– Obesity (based of calculated BMI)</li> <li>– Chronic respiratory disease</li> <li>– Chronic kidney disease</li> <li>– Cancer</li> <li>– Immunosuppression</li> <li>– Diabetes</li> <li>– Pregnancy</li> <li>– Smoking habits</li> </ul> |
| <u>Vaccination</u>                                        | <ul style="list-style-type: none"> <li>– Number of doses</li> <li>– Dates of doses</li> </ul>                                                                                                                                                                                                                                              |
| <u>Environmental risk factors</u>                         | <ul style="list-style-type: none"> <li>– Homelessness</li> <li>– Nursing home resident</li> <li>– Asylum seeker or other migrant living in a collective housing</li> <li>– Living in another type of collective housing</li> <li>– Economic insecurity</li> </ul>                                                                          |

|                                                                           |                                                                                                                                                                                                                                                                                                                                                                                                               |
|---------------------------------------------------------------------------|---------------------------------------------------------------------------------------------------------------------------------------------------------------------------------------------------------------------------------------------------------------------------------------------------------------------------------------------------------------------------------------------------------------|
| <p><u>Possible context of infection</u></p>                               | <ul style="list-style-type: none"> <li>– In the family or living in the same household</li> <li>– In the workplace</li> <li>– At school</li> <li>– As a healthcare professional</li> <li>– During a public event</li> <li>– At a private party</li> <li>– In a night club</li> <li>– In a bar/ restaurant</li> <li>– During a spontaneous gathering (including between friends)</li> <li>– No idea</li> </ul> |
| <p><u>Symptoms</u></p>                                                    | <ul style="list-style-type: none"> <li>– Cough</li> <li>– Presence of sputum</li> <li>– Dyspnea</li> <li>– Fever (&gt; 38C)</li> <li>– Chills</li> <li>– Headache</li> <li>– Fatigue</li> <li>– Arthralgia and/or myalgia</li> <li>– Sore throat</li> <li>– Rhinorrhea, nasal congestion</li> <li>– Anosmia or ageusia</li> <li>– Gastrointestinal symptoms</li> <li>– Skin rash</li> <li>– None</li> </ul>   |
| <p><u>Factors likely to adversely influence the course of disease</u></p> | <ul style="list-style-type: none"> <li>– High anxiety level</li> <li>– Feeling of isolation</li> <li>– Difficulties in daily management</li> </ul>                                                                                                                                                                                                                                                            |
| <p><u>Red Flags</u></p>                                                   | <ul style="list-style-type: none"> <li>– New-onset or worsening dyspnea</li> <li>– Fever for more than 5 days, or worsening fever non responding to treatment</li> <li>– Deterioration of the general status</li> <li>– Worsening cough</li> <li>– Hemoptysis</li> <li>– Confusion</li> <li>– Gastrointestinal symptoms with dehydration</li> <li>– Moderate to severe chest pain</li> </ul>                  |
| <p><u>Positive patients' self-reported compliance to</u></p>              | <ul style="list-style-type: none"> <li>– Full compliance</li> <li>– Partial compliance</li> <li>– Insufficient compliance</li> </ul>                                                                                                                                                                                                                                                                          |



|                                                          |                                                                                                                                                                                                                                                                                                                                                                                                                                                                                                                                                                                                                                                                                                                                                                                                                                                                  |
|----------------------------------------------------------|------------------------------------------------------------------------------------------------------------------------------------------------------------------------------------------------------------------------------------------------------------------------------------------------------------------------------------------------------------------------------------------------------------------------------------------------------------------------------------------------------------------------------------------------------------------------------------------------------------------------------------------------------------------------------------------------------------------------------------------------------------------------------------------------------------------------------------------------------------------|
| <u>recommended isolation measures</u>                    |                                                                                                                                                                                                                                                                                                                                                                                                                                                                                                                                                                                                                                                                                                                                                                                                                                                                  |
| <u>Timeline</u>                                          | <ul style="list-style-type: none"> <li>– Date of symptom onset</li> <li>– Date of testing</li> </ul>                                                                                                                                                                                                                                                                                                                                                                                                                                                                                                                                                                                                                                                                                                                                                             |
| <u>Death</u>                                             | <ul style="list-style-type: none"> <li>– Site (at home, nursing home, hospital)</li> <li>– Date</li> </ul>                                                                                                                                                                                                                                                                                                                                                                                                                                                                                                                                                                                                                                                                                                                                                       |
| <u>Contact tracing</u>                                   | <ul style="list-style-type: none"> <li>– Number of close contacts per index case</li> <li>– Type of contact between index case and close contact: <ul style="list-style-type: none"> <li>– Living in the same household</li> <li>– Intimate contact</li> <li>– Professional</li> <li>– Healthcare environment</li> <li>– Social interaction</li> <li>– Recreational</li> <li>– Schooling</li> </ul> </li> <li>– Date of last contact between index case and close contact</li> </ul>                                                                                                                                                                                                                                                                                                                                                                             |
| <u>Close contact information</u>                         | <ul style="list-style-type: none"> <li>– Demographics: <ul style="list-style-type: none"> <li>○ Date of birth</li> <li>○ Gender</li> <li>○ Personal and professional addresses</li> </ul> </li> <li>– Vaccination information (number of doses, dates)</li> <li>– Environmental risk factors <ul style="list-style-type: none"> <li>○ Homelessness</li> <li>○ Nursing home resident</li> <li>○ Asylum seeker or other migrant living in a collective housing</li> <li>○ Living in another type of collective housing</li> <li>○ Economic insecurity</li> <li>○ Healthcare professional</li> </ul> </li> <li>– Presence of symptoms at first call and follow-up calls</li> <li>– Compliance to quarantine measures at first call and follow-up call</li> <li>– Quarantine period (dates of onset and end)</li> <li>– Tested positive during quarantine</li> </ul> |
| <u>Quarantine after travelling in a red list country</u> | <ul style="list-style-type: none"> <li>– Number of people in quarantine</li> <li>– Demographics: <ul style="list-style-type: none"> <li>○ Date of birth</li> <li>○ Gender</li> <li>○ Personal address in Geneva / during stay</li> </ul> </li> </ul>                                                                                                                                                                                                                                                                                                                                                                                                                                                                                                                                                                                                             |

|  |                                                                                                                                                                                                                                                                                                                                                                                                                                                                |
|--|----------------------------------------------------------------------------------------------------------------------------------------------------------------------------------------------------------------------------------------------------------------------------------------------------------------------------------------------------------------------------------------------------------------------------------------------------------------|
|  | <ul style="list-style-type: none"> <li>– Red list country <ul style="list-style-type: none"> <li>○ Name</li> <li>○ Date of departure</li> </ul> </li> <li>– Vaccination (number of doses, dates)</li> <li>– Quarantine period (dates of onset and end)</li> <li>– Presence of symptoms at first call and follow-up calls</li> <li>– Compliance to quarantine measures at first call and follow-up call</li> <li>– Tested positive during quarantine</li> </ul> |
|--|----------------------------------------------------------------------------------------------------------------------------------------------------------------------------------------------------------------------------------------------------------------------------------------------------------------------------------------------------------------------------------------------------------------------------------------------------------------|

Table 1, Actionable Register of Geneva Out- and inpatients with SARS-CoV-2 (ARGOS) collected data

|                                                   | Overall      | 2020-02-25<br>-> 2020-04-27 | 2020-04-27<br>-> 2020-09-24 | 2020-09-24<br>-> 2021-02-14 | 2021-02-14<br>->2021-06-02 |
|---------------------------------------------------|--------------|-----------------------------|-----------------------------|-----------------------------|----------------------------|
| Number of positive patients                       |              |                             |                             |                             |                            |
| n                                                 | 60788        | 5782                        | 3274                        | 40882                       | 10824                      |
| Living in Geneva                                  | 53344 (88.2) | 4793 (84.4)                 | 2827 (86.5)                 | 35936 (88.3)                | 9775 (90.4)                |
| Number of follow-up per patient recorded in ARGOS |              |                             |                             |                             |                            |
| Not called                                        | 9514 (15.7)  | 1135 (19.6)                 | 108 (3.3)                   | 8128 (19.9)                 | 131 (1.2)                  |
| First contact only                                | 22847 (37.6) | 3402 (58.8)                 | 578 (17.7)                  | 17541 (42.9)                | 1316 (12.2)                |
| 1 Follow-up call                                  | 6427 (10.6)  | 346 (6.0)                   | 735 (22.4)                  | 4387 (10.7)                 | 959 (8.9)                  |
| 2 follow-up calls                                 | 5178 (8.5)   | 152 (2.6)                   | 683 (20.9)                  | 2362 (5.8)                  | 1977 (18.3)                |
| 3 or more follow-up calls                         | 16822 (27.7) | 747 (12.9)                  | 1170 (35.7)                 | 8464 (20.7)                 | 6441 (59.5)                |
| Age                                               |              |                             |                             |                             |                            |
| 0-19                                              | 6997 (11.5)  | 175 (3.0)                   | 364 (11.1)                  | 4052 (9.9)                  | 2406 (22.2)                |
| 20-39                                             | 21080 (34.7) | 1690 (29.2)                 | 1558 (47.7)                 | 14356 (35.1)                | 3473 (32.1)                |
| 40-64                                             | 23879 (39.3) | 2567 (44.4)                 | 1101 (33.7)                 | 16007 (39.2)                | 4202 (38.8)                |
| 65-80                                             | 5046 (8.3)   | 676 (11.7)                  | 138 (4.2)                   | 3693 (9.0)                  | 539 (5.0)                  |
| >80                                               | 3750 (6.2)   | 674 (11.7)                  | 108 (3.3)                   | 2769 (6.8)                  | 199 (1.8)                  |
| Gender                                            |              |                             |                             |                             |                            |

|                                |              |             |             |              |              |
|--------------------------------|--------------|-------------|-------------|--------------|--------------|
| Male                           | 28314 (46.6) | 2549 (44.1) | 1628 (49.8) | 18890 (46.2) | 5238 (48.4)  |
| Female                         | 32433 (53.4) | 3233 (55.9) | 1643 (50.2) | 21972 (53.8) | 5574 (51.5)  |
| Non binary                     | 22 (0.0)     | 0 (0.0)     | 1 (0.0)     | 8 (0.0)      | 12 (0.1)     |
| Comorbidities and risk factors |              |             |             |              |              |
| Cardiovascular disease         | 1835 (3.0)   | 396 (6.8)   | 95 (2.9)    | 1103 (2.7)   | 241 (2.2)    |
| Hypertension                   | 4469 (7.4)   | 600 (10.4)  | 196 (6.0)   | 2968 (7.3)   | 705 (6.5)    |
| Diabetes                       | 1975 (3.2)   | 273 (4.7)   | 95 (2.9)    | 1295 (3.2)   | 312 (2.9)    |
| Chronic respiratory illness    | 2170 (3.6)   | 512 (8.9)   | 83 (2.5)    | 1269 (3.1)   | 306 (2.8)    |
| kidney                         | 229 (0.4)    | N/A         | N/A         | 186 (0.5)    | 43 (0.4)     |
| Cancer                         | 545 (0.9)    | 73 (1.3)    | 28 (0.9)    | 349 (0.9)    | 95 (0.9)     |
| Immunosuppression              | 600 (1.0)    | 192 (3.3)   | 30 (0.9)    | 301 (0.7)    | 77 (0.7)     |
| obesity                        | 1081 (1.8)   | N/A         | N/A         | 778 (1.9)    | 303 (2.8)    |
| Age 65 and older               | 8796 (14.5)  | 1350 (23.3) | 246 (7.5)   | 6462 (15.8)  | 738 (6.8)    |
| No risk factor                 | 36905 (60.8) | 1868 (32.4) | 2523 (77.1) | 24093 (59.0) | 8419 (77.8)  |
| Missing information            | 8698 (14.3)  | 1854 (32.1) | 209 (6.4)   | 6221 (15.2)  | 411 (3.8)    |
| Other potential risks          |              |             |             |              |              |
| Chronic disease                | 787 (1.3)    | 56 (1.0)    | 28 (0.9)    | 550 (1.3)    | 152 (1.4)    |
| smoking                        | 4659 (7.7)   | N/A         | N/A         | 3345 (8.2)   | 1313 (12.1)  |
| pregnancy                      | 533 (0.9)    | 41 (0.7)    | 24 (0.7)    | 352 (0.9)    | 116 (1.1)    |
| Other risk                     | 4284 (7.0)   | 107 (1.9)   | 364 (11.1)  | 2741 (6.7)   | 1072 (9.9)   |
| Self reported symptoms         |              |             |             |              |              |
| Missing information            | 12735 (21.0) | 2632 (45.5) | 264 (8.1)   | 9217 (23.3)  | 604 (5.0)    |
| no symptoms ever declared      | 3893 (6.4)   | 254 (4.4)   | 416 (12.7)  | 1807 (4.6)   | 1413 (11.6)  |
| At least one symptom           | 44159 (72.6) | 2896 (50.1) | 2594 (79.2) | 28516 (72.1) | 10148 (83.4) |
| Possible context of infection  |              |             |             |              |              |
| family                         | 17266 (28.4) | N/A         | 511 (15.6)  | 11861 (29.0) | 4889 (45.2)  |
| work                           | 8535 (14.0)  | N/A         | 304 (9.3)   | 6588 (16.1)  | 1639 (15.1)  |
| school                         | 3302 (5.4)   | N/A         | 0 (0.0)     | 2200 (5.4)   | 1101 (10.2)  |
| Health care worker             | 894 (1.5)    | N/A         | 17 (0.5)    | 808 (2.0)    | 67 (0.6)     |
| Public event                   | 204 (0.3)    | N/A         | 22 (0.7)    | 138 (0.3)    | 44 (0.4)     |
| private_party                  | 1372 (2.3)   | N/A         | 184 (5.6)   | 933 (2.3)    | 255 (2.4)    |
| club                           | 70 (0.1)     | N/A         | 24 (0.7)    | 41 (0.1)     | 5 (0.0)      |
| restaurant                     | 1346 (2.2)   | N/A         | 161 (4.9)   | 1125 (2.8)   | 60 (0.6)     |

|                                                            |                   |                   |                   |                   |                   |
|------------------------------------------------------------|-------------------|-------------------|-------------------|-------------------|-------------------|
| Spontaneous gathering                                      | 2527 (4.2)        | N/A               | 81 (2.5)          | 1718 (4.2)        | 728 (6.7)         |
| No idea                                                    | 14090 (23.2)      | N/A               | 410 (12.5)        | 10451 (25.6)      | 3222 (29.8)       |
| Other                                                      | 4921 (8.1)        | N/A               | 488 (14.9)        | 3574 (8.7)        | 858 (7.9)         |
| Missing information                                        | 16520 (27.2)      | 5775 (100)        | 1356 (41.4)       | 8885 (21.7)       | 486 (4.5)         |
| Profession                                                 |                   |                   |                   |                   |                   |
| health care professional                                   | 4503 (7.4)        | 902 (15.6)        | 175 (5.3)         | 2973 (7.3)        | 452 (4.2)         |
| Environmental risk factor                                  |                   |                   |                   |                   |                   |
| Homelessness                                               | 135 (0.2)         | 15 (0.3)          | 6 (0.2)           | 102 (0.2)         | 12 (0.1)          |
| Nursing home resident                                      | 1895 (3.1)        | 377 (6.5)         | 63 (1.9)          | 1403 (3.4)        | 49 (0.5)          |
| Asylum seeker or other migrant living in a collective home | 267 (0.4)         | 25 (0.4)          | 2 (0.1)           | 172 (0.4)         | 68 (0.6)          |
| Collective home resident (other than migrant)              | 627 (1.0)         | 34 (0.6)          | 31 (0.9)          | 431 (1.1)         | 131 (1.2)         |
| Reason for testing                                         |                   |                   |                   |                   |                   |
| Acute symptoms                                             | 45321 (88.0)      | 5633 (99.9)       | 2693 (85.9)       | 28785 (89.2)      | 8204 (78.8)       |
| Testing                                                    |                   |                   |                   |                   |                   |
| Total number of tests performed                            | 655527            | 28931             | 80342             | 291510            | 254744            |
| PCR                                                        | 584573 (89.2)     | 28879 (99.8)      | 80339 (100.0)     | 263182 (90.3)     | 212173 (83.3)     |
| Number of patient tested                                   | 360525            | 25853             | 71269             | 210598            | 169164            |
| Positivity rate                                            | 9.4               | 21.0              | 4.1               | 14.3              | 4.3               |
| deaths                                                     |                   |                   |                   |                   |                   |
| Deaths number                                              | 747               | 280               | 20                | 421               | 22                |
| Age                                                        | 87.1 [80.2, 91.5] | 86.3 [79.4, 91.3] | 89.2 [85.8, 93.3] | 87.7 [81.4, 91.8] | 83.6 [70.5, 90.3] |
| Gender                                                     | 354 (47.4)        | 130 (46.4)        | 10 (50.0)         | 200 (47.7)        | 11 (45.8)         |
| Contact tracing                                            |                   |                   |                   |                   |                   |
| Number total of contact                                    | 114690            | 118               | 12420             | 77990             | 24162             |
| Number of contact per index patient                        | 3 [1, 6]          | 0 [0, 0]          | 7 [4, 11]         | 3 [1, 6]          | 3 [2, 5]          |
| Quarantine after contact with positive                     |                   |                   |                   |                   |                   |

|                                                |        |     |       |        |        |
|------------------------------------------------|--------|-----|-------|--------|--------|
| Number of days                                 | 639153 | N/A | 31615 | 445468 | 162003 |
| Number of infection during quarantine          | 9551   | N/A | 333   | 6009   | 3209   |
| Pourcentage of quarantine leading to infection | 14.94  | N/A | 10.53 | 13.49  | 19.81  |
| Quarantine after traveling                     |        |     |       |        |        |
| Number of days                                 | 273189 | N/A | 85490 | 121202 | 66429  |
| Number of infection during quarantine          | 96     | N/A | 29    | 42     | 25     |
| Pourcentage of quarantine leading to infection | 0.35   | N/A | 0.34  | 0.35   | 0.38   |

Table 2, ARGOS baseline characteristics of positive patients, Geneva, February 26 ,2020 – June 1st, 2021. Periods are presented by grouping together the first wave of cases, the period between the two waves, the second wave and the following period of sustained epidemic activity, and finally the more recent period following the start of the vaccination campaign.

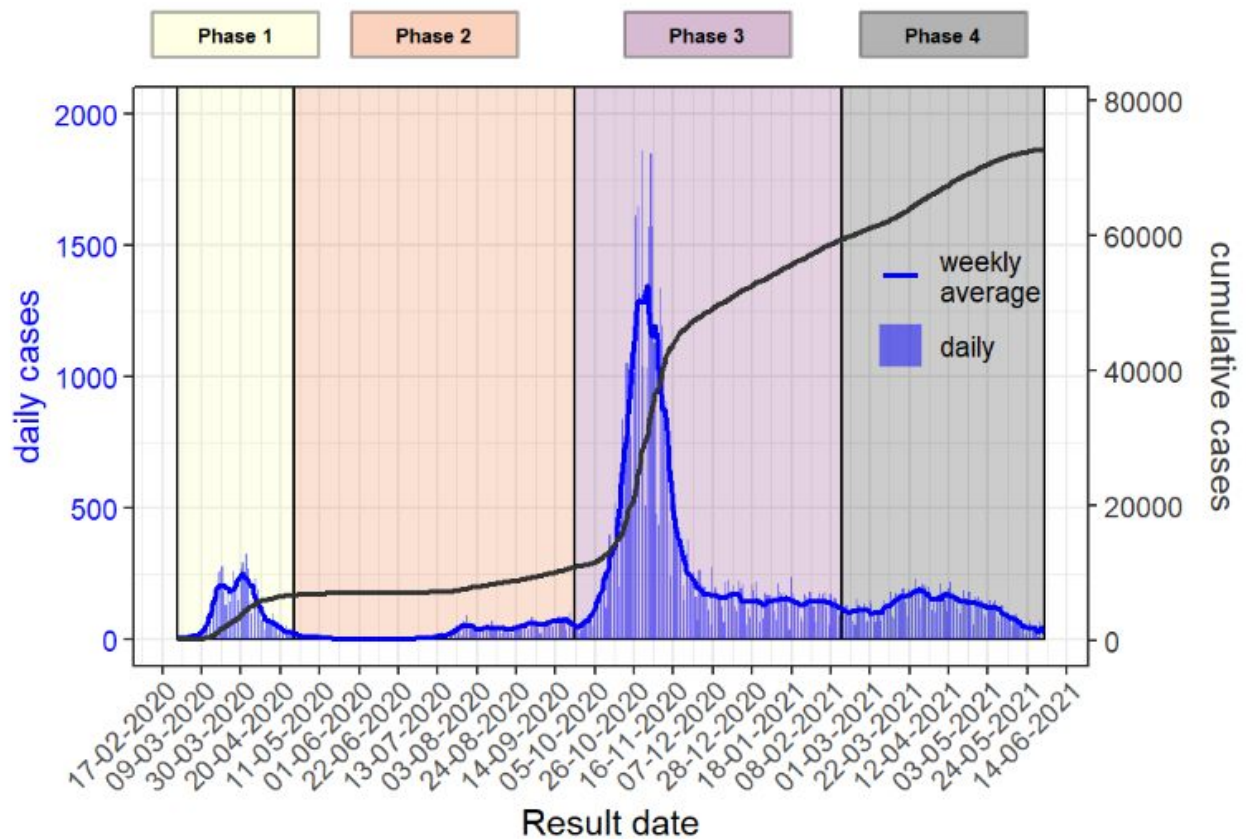

**Figure 1**, Epidemic Curve of the cases of Coronavirus Disease 2019 (COVID-19) in Geneva state, February 26 ,2020 – June 1st, 2021. Vertical bars represent the daily cases (based on the date of the test result), solid blue line represents the weekly moving average and the solid black line the cumulative cases.

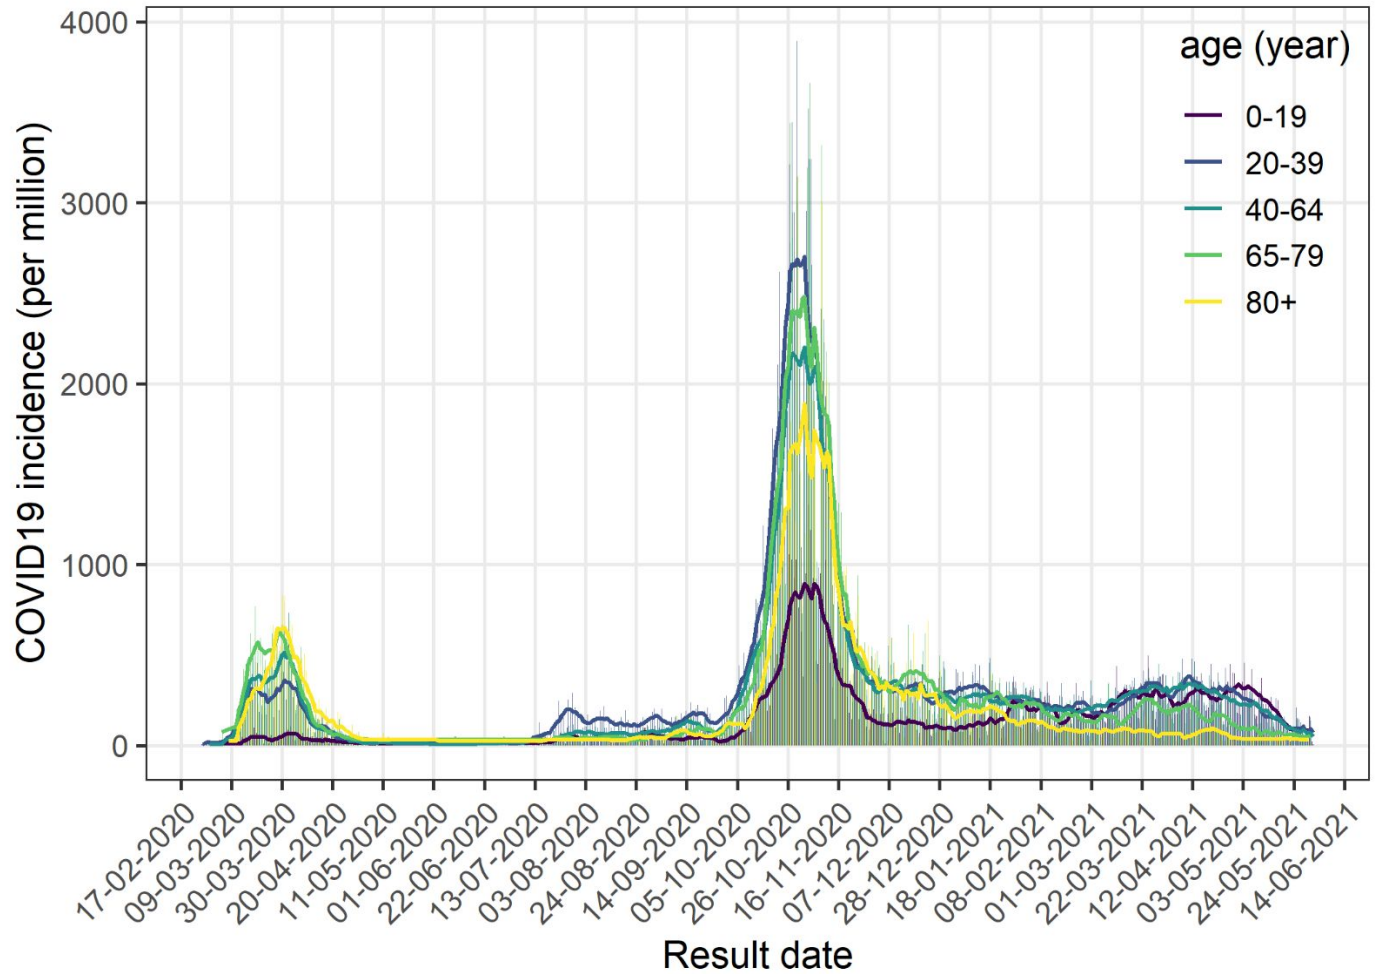

**Figure 2,** Incidence per age category, Geneva, February 26 ,2020 – June 1st, 2021.

Vertical bars represent the daily incidence, solid line represent the weekly moving average.

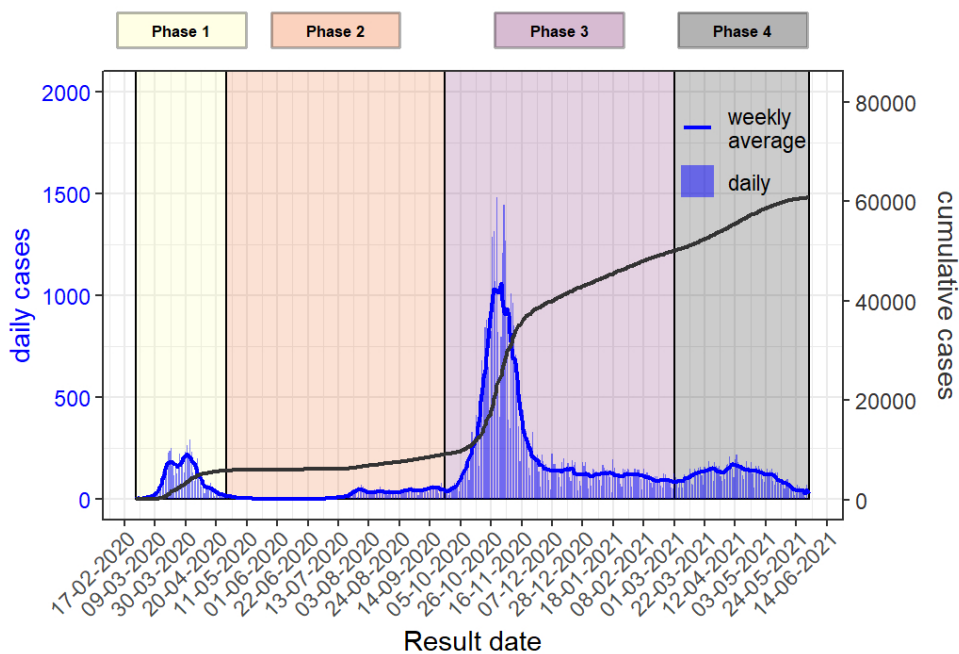

Epidemic Curve of the cases of Coronavirus Disease 2019 (COVID-19) in Geneva state, February 26 ,2020 – June 1st, 2021. Vertical bars represent the daily cases (based on the date of the test result), solid blue line represents the weekly moving average and the solid black line the cumulative cases.

89x64mm (300 x 300 DPI)



1  
2  
3  
4  
5  
6  
7  
8  
9  
10  
11  
12  
13  
14  
15  
16  
17  
18  
19  
20  
21  
22  
23  
24  
25  
26  
27  
28  
29  
30  
31  
32  
33  
34  
35  
36  
37  
38  
39  
40  
41  
42  
43  
44  
45  
46  
47  
48  
49  
50  
51  
52  
53  
54  
55  
56  
57  
58  
59  
60

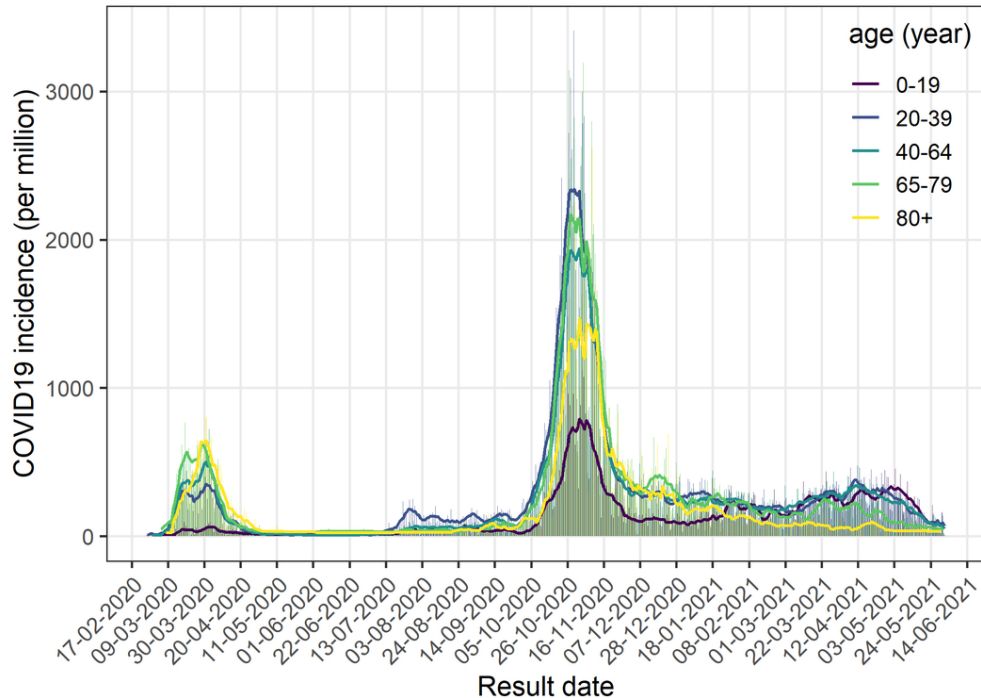

Incidence per age category, Geneva, February 26 ,2020 – June 1st, 2021. Vertical bars represent the daily incidence, solid line represent the weekly moving average.

89x64mm (300 x 300 DPI)

# Reporting checklist for cohort study.

Based on the STROBE cohort guidelines.

## Instructions to authors

Complete this checklist by entering the page numbers from your manuscript where readers will find each of the items listed below.

Your article may not currently address all the items on the checklist. Please modify your text to include the missing information. If you are certain that an item does not apply, please write "n/a" and provide a short explanation.

Upload your completed checklist as an extra file when you submit to a journal.

In your methods section, say that you used the STROBE cohort reporting guidelines, and cite them as:

von Elm E, Altman DG, Egger M, Pocock SJ, Gøtzsche PC, Vandenbroucke JP. The Strengthening of Reporting of Observational Studies in Epidemiology (STROBE) Statement: guidelines for reporting observational studies.

|                           |                     | Reporting Item                                                                                  | Page Number |
|---------------------------|---------------------|-------------------------------------------------------------------------------------------------|-------------|
| <b>Title and abstract</b> |                     |                                                                                                 |             |
| Title                     | <a href="#">#1a</a> | Indicate the study's design with a commonly used term in the title or the abstract              | 1           |
| Abstract                  | <a href="#">#1b</a> | Provide in the abstract an informative and balanced summary of what was done and what was found | 3-4         |
| <b>Introduction</b>       |                     |                                                                                                 |             |
| Background / rationale    | <a href="#">#2</a>  | Explain the scientific background and rationale for the investigation being reported            | 5-6         |
| Objectives                | <a href="#">#3</a>  | State specific objectives, including any prespecified hypotheses                                | 5-6         |
| <b>Methods</b>            |                     |                                                                                                 |             |

|    |                      |                      |                                                                 |            |
|----|----------------------|----------------------|-----------------------------------------------------------------|------------|
| 1  | Study design         | <a href="#">#4</a>   | Present key elements of study design early in the paper         | 6          |
| 2  |                      |                      |                                                                 |            |
| 3  | Setting              | <a href="#">#5</a>   | Describe the setting, locations, and relevant dates, including  | 6-7        |
| 4  |                      |                      | periods of recruitment, exposure, follow-up, and data           |            |
| 5  |                      |                      | collection                                                      |            |
| 6  |                      |                      |                                                                 |            |
| 7  |                      |                      |                                                                 |            |
| 8  | Eligibility criteria | <a href="#">#6a</a>  | Give the eligibility criteria, and the sources and methods of   | 7-8        |
| 9  |                      |                      | selection of participants. Describe methods of follow-up.       |            |
| 10 |                      |                      |                                                                 |            |
| 11 | Eligibility criteria | <a href="#">#6b</a>  | For matched studies, give matching criteria and number of       | n/a        |
| 12 |                      |                      | exposed and unexposed                                           |            |
| 13 |                      |                      |                                                                 |            |
| 14 |                      |                      |                                                                 |            |
| 15 |                      |                      |                                                                 |            |
| 16 | Variables            | <a href="#">#7</a>   | Clearly define all outcomes, exposures, predictors, potential   | 8-9, table |
| 17 |                      |                      | confounders, and effect modifiers. Give diagnostic criteria, if | 1          |
| 18 |                      |                      | applicable                                                      |            |
| 19 |                      |                      |                                                                 |            |
| 20 |                      |                      |                                                                 |            |
| 21 | Data sources /       | <a href="#">#8</a>   | For each variable of interest give sources of data and          | 7-9        |
| 22 | measurement          |                      | details of methods of assessment (measurement). Describe        |            |
| 23 |                      |                      | comparability of assessment methods if there is more than       |            |
| 24 |                      |                      | one group. Give information separately for for exposed and      |            |
| 25 |                      |                      | unexposed groups if applicable.                                 |            |
| 26 |                      |                      |                                                                 |            |
| 27 |                      |                      |                                                                 |            |
| 28 |                      |                      |                                                                 |            |
| 29 |                      |                      |                                                                 |            |
| 30 | Bias                 | <a href="#">#9</a>   | Describe any efforts to address potential sources of bias       | 14-16      |
| 31 |                      |                      |                                                                 |            |
| 32 | Study size           | <a href="#">#10</a>  | Explain how the study size was arrived at                       | 9-10       |
| 33 |                      |                      |                                                                 |            |
| 34 | Quantitative         | <a href="#">#11</a>  | Explain how quantitative variables were handled in the          | n/a        |
| 35 | variables            |                      | analyses. If applicable, describe which groupings were          |            |
| 36 |                      |                      | chosen, and why                                                 |            |
| 37 |                      |                      |                                                                 |            |
| 38 |                      |                      |                                                                 |            |
| 39 |                      |                      |                                                                 |            |
| 40 | Statistical          | <a href="#">#12a</a> | Describe all statistical methods, including those used to       | Along text |
| 41 | methods              |                      | control for confounding                                         |            |
| 42 |                      |                      |                                                                 |            |
| 43 |                      |                      |                                                                 |            |
| 44 | Statistical          | <a href="#">#12b</a> | Describe any methods used to examine subgroups and              | n/a        |
| 45 | methods              |                      | interactions                                                    |            |
| 46 |                      |                      |                                                                 |            |
| 47 |                      |                      |                                                                 |            |
| 48 | Statistical          | <a href="#">#12c</a> | Explain how missing data were addressed                         | 15         |
| 49 | methods              |                      |                                                                 |            |
| 50 |                      |                      |                                                                 |            |
| 51 | Statistical          | <a href="#">#12d</a> | If applicable, explain how loss to follow-up was addressed      | n/a        |
| 52 | methods              |                      |                                                                 |            |
| 53 |                      |                      |                                                                 |            |
| 54 |                      |                      |                                                                 |            |
| 55 | Statistical          | <a href="#">#12e</a> | Describe any sensitivity analyses                               | n/a        |
| 56 | methods              |                      |                                                                 |            |
| 57 |                      |                      |                                                                 |            |
| 58 |                      |                      |                                                                 |            |
| 59 |                      |                      |                                                                 |            |
| 60 |                      |                      |                                                                 |            |

## Results

|    |                   |                      |                                                                       |
|----|-------------------|----------------------|-----------------------------------------------------------------------|
| 1  |                   |                      |                                                                       |
| 2  |                   |                      |                                                                       |
| 3  | Participants      | <a href="#">#13a</a> | Report numbers of individuals at each stage of study—eg 9             |
| 4  |                   |                      |                                                                       |
| 5  |                   |                      | numbers potentially eligible, examined for eligibility,               |
| 6  |                   |                      | confirmed eligible, included in the study, completing follow-         |
| 7  |                   |                      | up, and analysed. Give information separately for for                 |
| 8  |                   |                      | exposed and unexposed groups if applicable.                           |
| 9  |                   |                      |                                                                       |
| 10 |                   |                      |                                                                       |
| 11 | Participants      | <a href="#">#13b</a> | Give reasons for non-participation at each stage 9, table 2           |
| 12 |                   |                      |                                                                       |
| 13 | Participants      | <a href="#">#13c</a> | Consider use of a flow diagram n/a                                    |
| 14 |                   |                      |                                                                       |
| 15 |                   |                      |                                                                       |
| 16 | Descriptive data  | <a href="#">#14a</a> | Give characteristics of study participants (eg demographic, 9-13,     |
| 17 |                   |                      | clinical, social) and information on exposures and potential table 2, |
| 18 |                   |                      | confounders. Give information separately for exposed and figure 2     |
| 19 |                   |                      | unexposed groups if applicable.                                       |
| 20 |                   |                      |                                                                       |
| 21 |                   |                      |                                                                       |
| 22 | Descriptive data  | <a href="#">#14b</a> | Indicate number of participants with missing data for each Table 2    |
| 23 |                   |                      | variable of interest                                                  |
| 24 |                   |                      |                                                                       |
| 25 |                   |                      |                                                                       |
| 26 | Descriptive data  | <a href="#">#14c</a> | Summarise follow-up time (eg, average and total amount) 9-13,         |
| 27 |                   |                      | figure 1                                                              |
| 28 |                   |                      |                                                                       |
| 29 |                   |                      |                                                                       |
| 30 | Outcome data      | <a href="#">#15</a>  | Report numbers of outcome events or summary measures 9-13             |
| 31 |                   |                      | over time. Give information separately for exposed and                |
| 32 |                   |                      | unexposed groups if applicable.                                       |
| 33 |                   |                      |                                                                       |
| 34 |                   |                      |                                                                       |
| 35 |                   |                      |                                                                       |
| 36 | Main results      | <a href="#">#16a</a> | Give unadjusted estimates and, if applicable, confounder- 9-13,       |
| 37 |                   |                      | adjusted estimates and their precision (eg, 95% confidence table 2    |
| 38 |                   |                      | interval). Make clear which confounders were adjusted for             |
| 39 |                   |                      | and why they were included                                            |
| 40 |                   |                      |                                                                       |
| 41 |                   |                      |                                                                       |
| 42 | Main results      | <a href="#">#16b</a> | Report category boundaries when continuous variables n/a              |
| 43 |                   |                      | were categorized                                                      |
| 44 |                   |                      |                                                                       |
| 45 |                   |                      |                                                                       |
| 46 | Main results      | <a href="#">#16c</a> | If relevant, consider translating estimates of relative risk into n/a |
| 47 |                   |                      | absolute risk for a meaningful time period                            |
| 48 |                   |                      |                                                                       |
| 49 |                   |                      |                                                                       |
| 50 | Other analyses    | <a href="#">#17</a>  | Report other analyses done—e.g., analyses of subgroups n/a            |
| 51 |                   |                      | and interactions, and sensitivity analyses                            |
| 52 |                   |                      |                                                                       |
| 53 |                   |                      |                                                                       |
| 54 | <b>Discussion</b> |                      |                                                                       |
| 55 |                   |                      |                                                                       |
| 56 | Key results       | <a href="#">#18</a>  | Summarise key results with reference to study objectives 13-14        |
| 57 |                   |                      |                                                                       |
| 58 |                   |                      |                                                                       |
| 59 |                   |                      |                                                                       |
| 60 |                   |                      |                                                                       |

|    |                    |                     |                                                                 |       |
|----|--------------------|---------------------|-----------------------------------------------------------------|-------|
| 1  | Limitations        | <a href="#">#19</a> | Discuss limitations of the study, taking into account sources   | 14-15 |
| 2  |                    |                     | of potential bias or imprecision. Discuss both direction and    |       |
| 3  |                    |                     | magnitude of any potential bias.                                |       |
| 4  |                    |                     |                                                                 |       |
| 5  |                    |                     |                                                                 |       |
| 6  | Interpretation     | <a href="#">#20</a> | Give a cautious overall interpretation considering objectives,  | 15-16 |
| 7  |                    |                     | limitations, multiplicity of analyses, results from similar     |       |
| 8  |                    |                     | studies, and other relevant evidence.                           |       |
| 9  |                    |                     |                                                                 |       |
| 10 |                    |                     |                                                                 |       |
| 11 | Generalisability   | <a href="#">#21</a> | Discuss the generalisability (external validity) of the study   | 15-16 |
| 12 |                    |                     | results                                                         |       |
| 13 |                    |                     |                                                                 |       |
| 14 |                    |                     |                                                                 |       |
| 15 | <b>Other</b>       |                     |                                                                 |       |
| 16 | <b>Information</b> |                     |                                                                 |       |
| 17 |                    |                     |                                                                 |       |
| 18 |                    |                     |                                                                 |       |
| 19 | Funding            | <a href="#">#22</a> | Give the source of funding and the role of the funders for      | 16    |
| 20 |                    |                     | the present study and, if applicable, for the original study on |       |
| 21 |                    |                     | which the present article is based                              |       |
| 22 |                    |                     |                                                                 |       |
| 23 |                    |                     |                                                                 |       |

#### Notes:

- The STROBE checklist is distributed under the terms of the Creative Commons Attribution License CC-BY. This checklist was completed on 23. June 2021 using <https://www.goodreports.org/>, a tool made by the [EQUATOR Network](#) in collaboration with [Penelope.ai](#)

# BMJ Open

## Cohort profile: Actionable Register of Geneva Out- and inpatients with SARS-CoV-2 (ARGOS)

|                                 |                                                                                                                                                                                                                                                                                                                                                                                                                                                                                                                                                                                                                                                                                                                                                                                                                                                                                                                                                                                                                                                                                                                                                                                                                                                                                                                                                                                                                                                                                                                                                                                                                                                                                                                                                                                                                                                                            |
|---------------------------------|----------------------------------------------------------------------------------------------------------------------------------------------------------------------------------------------------------------------------------------------------------------------------------------------------------------------------------------------------------------------------------------------------------------------------------------------------------------------------------------------------------------------------------------------------------------------------------------------------------------------------------------------------------------------------------------------------------------------------------------------------------------------------------------------------------------------------------------------------------------------------------------------------------------------------------------------------------------------------------------------------------------------------------------------------------------------------------------------------------------------------------------------------------------------------------------------------------------------------------------------------------------------------------------------------------------------------------------------------------------------------------------------------------------------------------------------------------------------------------------------------------------------------------------------------------------------------------------------------------------------------------------------------------------------------------------------------------------------------------------------------------------------------------------------------------------------------------------------------------------------------|
| Journal:                        | <i>BMJ Open</i>                                                                                                                                                                                                                                                                                                                                                                                                                                                                                                                                                                                                                                                                                                                                                                                                                                                                                                                                                                                                                                                                                                                                                                                                                                                                                                                                                                                                                                                                                                                                                                                                                                                                                                                                                                                                                                                            |
| Manuscript ID                   | bmjopen-2021-048946.R2                                                                                                                                                                                                                                                                                                                                                                                                                                                                                                                                                                                                                                                                                                                                                                                                                                                                                                                                                                                                                                                                                                                                                                                                                                                                                                                                                                                                                                                                                                                                                                                                                                                                                                                                                                                                                                                     |
| Article Type:                   | Cohort profile                                                                                                                                                                                                                                                                                                                                                                                                                                                                                                                                                                                                                                                                                                                                                                                                                                                                                                                                                                                                                                                                                                                                                                                                                                                                                                                                                                                                                                                                                                                                                                                                                                                                                                                                                                                                                                                             |
| Date Submitted by the Author:   | 23-Oct-2021                                                                                                                                                                                                                                                                                                                                                                                                                                                                                                                                                                                                                                                                                                                                                                                                                                                                                                                                                                                                                                                                                                                                                                                                                                                                                                                                                                                                                                                                                                                                                                                                                                                                                                                                                                                                                                                                |
| Complete List of Authors:       | <p>Genecand, Camille; Republic and Canton of Geneva Directorate of Health, Division of General Surgeon; Geneva University Hospitals, Division of Primary Care Medicine, Department of Community Medicine and Primary Care and Emergency Medicine</p> <p>Mongin, Denis; Republic and Canton of Geneva Directorate of Health, Division of General Surgeon</p> <p>Koegler, Flora; Hôpitaux universitaires de Genève Département de médecine interne,</p> <p>Lebowitz, Dan; Geneva University Hospitals, Infection Control Program</p> <p>Regard, Simon; Republic and Canton of Geneva Directorate of Health, Division of General Surgeon; Geneva University Hospitals, Department of Acute Medicine</p> <p>Falcone, Jean-Luc; University of Geneva, Department of Informatics</p> <p>Nehme, Mayssam; Hôpitaux Universitaires de Genève, Primary Care Division</p> <p>Braillard , Olivia; Geneva University Hospital, Division of Primary Care Medicine, Department of Community Medicine and Primary Care and Emergency Medicine</p> <p>Gira, Marwene; University Hospitals of Geneva Department of Community Medicine and First Aid and Emergencies, Division of Primary Care Medicine</p> <p>Joubert, Dominique ; Geneva University Hospitals, Quality of Care Service</p> <p>Chopard, Pierre; University Hospitals of Geneva, Quality of Care Service</p> <p>Delaporte, Elisabeth; Republic and Canton of Geneva Directorate of Health, Division of General Surgeon</p> <p>Stirnemann, Jerome; Geneva University Hospitals, Department of internal medicine</p> <p>Guessous, Idris; University Hospitals of Geneva, Community medicine, primary care and emergency</p> <p>Tardin, Aglaé; Republic and Canton of Geneva Directorate of Health, Division of General Surgeon</p> <p>Courvoisier, Delphine; Geneva University Hospitals, Division of clinical epidemiology</p> |
| <b>Primary Subject Heading</b>: | Epidemiology                                                                                                                                                                                                                                                                                                                                                                                                                                                                                                                                                                                                                                                                                                                                                                                                                                                                                                                                                                                                                                                                                                                                                                                                                                                                                                                                                                                                                                                                                                                                                                                                                                                                                                                                                                                                                                                               |
| Secondary Subject Heading:      | Public health                                                                                                                                                                                                                                                                                                                                                                                                                                                                                                                                                                                                                                                                                                                                                                                                                                                                                                                                                                                                                                                                                                                                                                                                                                                                                                                                                                                                                                                                                                                                                                                                                                                                                                                                                                                                                                                              |
| Keywords:                       | COVID-19, Public health < INFECTIOUS DISEASES, Epidemiology <                                                                                                                                                                                                                                                                                                                                                                                                                                                                                                                                                                                                                                                                                                                                                                                                                                                                                                                                                                                                                                                                                                                                                                                                                                                                                                                                                                                                                                                                                                                                                                                                                                                                                                                                                                                                              |

1  
2  
3  
4  
5  
6  
7  
8  
9  
10  
11  
12  
13  
14  
15  
16  
17  
18  
19  
20  
21  
22  
23  
24  
25  
26  
27  
28  
29  
30  
31  
32  
33  
34  
35  
36  
37  
38  
39  
40  
41  
42  
43  
44  
45  
46  
47  
48  
49  
50  
51  
52  
53  
54  
55  
56  
57  
58  
59  
60

|  |                     |
|--|---------------------|
|  | INFECTIOUS DISEASES |
|  |                     |

SCHOLARONE™  
Manuscripts



I, the Submitting Author has the right to grant and does grant on behalf of all authors of the Work (as defined in the below author licence), an exclusive licence and/or a non-exclusive licence for contributions from authors who are: i) UK Crown employees; ii) where BMJ has agreed a CC-BY licence shall apply, and/or iii) in accordance with the terms applicable for US Federal Government officers or employees acting as part of their official duties; on a worldwide, perpetual, irrevocable, royalty-free basis to BMJ Publishing Group Ltd ("BMJ") its licensees and where the relevant Journal is co-owned by BMJ to the co-owners of the Journal, to publish the Work in this journal and any other BMJ products and to exploit all rights, as set out in our [licence](#).

The Submitting Author accepts and understands that any supply made under these terms is made by BMJ to the Submitting Author unless you are acting as an employee on behalf of your employer or a postgraduate student of an affiliated institution which is paying any applicable article publishing charge ("APC") for Open Access articles. Where the Submitting Author wishes to make the Work available on an Open Access basis (and intends to pay the relevant APC), the terms of reuse of such Open Access shall be governed by a Creative Commons licence – details of these licences and which [Creative Commons](#) licence will apply to this Work are set out in our licence referred to above.

Other than as permitted in any relevant BMJ Author's Self Archiving Policies, I confirm this Work has not been accepted for publication elsewhere, is not being considered for publication elsewhere and does not duplicate material already published. I confirm all authors consent to publication of this Work and authorise the granting of this licence.



1  
2  
3  
4  
5  
6  
7  
8  
9  
10  
11  
12  
13 **Cohort profile:**

14  
15 **Actionable Register of Geneva Out- and inpatients with SARS-CoV-2**

16  
17  
18 **(ARGOS)**

19  
20  
21  
22  
23  
24  
25  
26 Camille Genecand\*<sup>1,4</sup>, Denis Mongin<sup>1</sup>, Flora Koegler<sup>2</sup>, Dan Lebowitz<sup>3</sup>, Simon Regard<sup>1,6</sup>,  
27  
28 Jean-Luc Falcone<sup>7</sup>, Mayssam Nehme<sup>4</sup>, Olivia Braillard<sup>4</sup>, Marwène Gira<sup>4</sup>, Dominique  
29  
30 Joubert<sup>5</sup>, Pierre Chopard<sup>5</sup>, Elisabeth Delaporte<sup>1</sup>, Jerome Stirnemann<sup>2</sup>, Idris Guessous<sup>4</sup>,  
31  
32 Aglaé Tardin<sup>1</sup>, Delphine S. Courvoisier<sup>5</sup>  
33  
34  
35  
36  
37  
38  
39  
40  
41  
42  
43  
44  
45  
46  
47

---

48 **\* Corresponding author**

49 [camille.genecand@etat.ge.ch](mailto:camille.genecand@etat.ge.ch)

50 Division of General Surgeon,  
51 Geneva Directorate of Health,  
52 Rue Adrien-Lachenal 8,  
53 CH-1207, Geneva, Switzerland  
54  
55  
56  
57  
58  
59  
60

**Authors affiliations:**

<sup>1</sup>Division of General Surgeon, Geneva Directorate of Health, Geneva, Switzerland;

<sup>2</sup>Division of General Internal Medicine, Department of Internal Medicine, Geneva

University Hospital, Geneva, Switzerland; <sup>3</sup>Infection Control Program, University of

Geneva Hospitals and Faculty of Medicine, University of Geneva, Geneva, Switzerland;

<sup>4</sup>Division of Primary Care Medicine, Department of Community Medicine and Primary

Care and Emergency Medicine, Geneva University Hospital, Geneva, Switzerland;

<sup>5</sup>Quality of Care Service, University Hospital of Geneva, Geneva, Switzerland; <sup>6</sup>Division

of Emergency Medicine, Department of Acute Medicine, Geneva University Hospital,

Geneva, Switzerland; <sup>7</sup>University of Geneva, Department of Informatics, Geneva,

Switzerland

## Abstract:

### **Purpose**

The Actionable Register of Geneva Out- and inpatients with SARS-CoV-2 (ARGOS) is an ongoing prospective cohort created by the Geneva Directorate of Health (GDH). It consists of an operational database compiling all SARS-CoV-2 test results conducted in the Geneva area since late February 2020. This article aims at presenting this comprehensive cohort, in light of some of the varying public health measures in Geneva, Switzerland, since March 2020.

### **Participants**

As of June 1st, 2021, the database included 356'868 patients, among which 65'475 had at least one positive test result for SARS-CoV-2. Among all positive patients, 37.6% were contacted only once, 10.6 % had one follow-up call, 8.5% had two, and 27.7% had 3 or more follow-up calls. Participation rate among positive patients is 94%. Data collection is ongoing.

### **Findings to date**

ARGOS data illustrates the magnitude of COVID-19 pandemic in Geneva, Switzerland, and details a variety of population factors and outcomes. The content of the cohort includes demographic data, comorbidities and risk factors for poor clinical outcome, self-reported COVID-19 symptoms, environmental and socio-economic factors, prospective and retrospective contact tracing data, travel quarantine data, and deaths. The registry

1  
2  
3 has already been used in several publications focusing on symptoms and long COVID,  
4  
5 infection fatality rate, and re-infection.  
6  
7

### 8 9 **Future plans:**

10  
11  
12 The data of this large real-world registry provides a valuable resource for various types  
13  
14 of research, such as clinical research, epidemiological research or policy assessment as  
15  
16 it illustrates the impact of public health policies and overall disease burden of COVID-19.  
17  
18  
19

### 20 **STRENGTHS AND LIMITATIONS OF THIS STUDY**

- 21  
22
- 23 • ARGOS' main strength consists of its large number of cases, representative of all  
24  
25 diagnosed cases on a regional level with the primary aim of assessing all cases.  
26  
27
  - 28 • ARGOS involves every individual who performed a SARS-CoV-2 test (PCR or  
29  
30 antigenic) and is not limited to hospitalized patients, thus providing a valuable  
31  
32 resource to assess the overall disease burden of COVID-19 in a geographically  
33  
34 defined population.  
35  
36
  - 37 • To mitigate confounding effects and improve data analysis and interpretation, we  
38  
39 present the data according to four policy periods.  
40  
41
  - 42 • This cohort is multicentric as it includes all tests performed in Geneva's hospitals  
43  
44 (both public and private), private practices and medical centers.  
45  
46
  - 47 • Due to operational needs, symptoms and comorbidities are self-reported, which may  
48  
49 lead to measurement error or misclassification.  
50  
51

52 Text word count: 3140 words  
53  
54  
55  
56  
57  
58  
59  
60

## Introduction

In December 2019, an increasing number of cases of pneumonia caused by a novel coronavirus, SARS-CoV-2<sup>1</sup>, was observed in Wuhan, China. On March 11, 2020, the World Health Organization (WHO) declared the coronavirus disease 2019 (COVID-19) outbreak a global pandemic(1,2). As of June 1st, 2021, the virus spread to 207 countries, infected close to 171 million people and caused 3.68 million deaths(3,4). In Switzerland, the cumulative incidence of laboratory confirmed COVID-19<sup>2</sup> cases during the first wave was in the top five countries in Europe, with about 400 confirmed cases per 100'000 population at the end of July 2020(4,5). In the Geneva area, the first COVID-19<sup>2</sup> patient was diagnosed on February 26, 2020(6). Possibly due to the city's geographical proximity to Northern Italy(7), the epidemic curve showed a steep upward trend. The first wave of the epidemic peaked in Geneva on April 2nd with 233 cases in 24 hours in an area with a population of 500'000. Geneva's cumulative incidence of confirmed cases is almost 3 times that of Switzerland(5), with more than 1'000 cases per 100'000 population(6), while the seroprevalence was estimated to be close to 10 times that of the confirmed cases as 9.7% of the population had antibodies three weeks after the height of the epidemic(8,9).

A database was created in early March in order to contact new cases and keep track of their follow-up. The Actionable Register of Geneva Out- and inpatients with SARS-CoV-

---

<sup>1</sup> Severe acute respiratory syndrome coronavirus 2

<sup>2</sup> coronavirus disease 2019

1  
2  
3 2<sup>1</sup> (ARGOS) includes all SARS-CoV-2<sup>1</sup> test results conducted in the Geneva area since  
4  
5 late February 2020, as well as those from Geneva residents being tested in other Swiss  
6  
7 cantons. After more than a year of pandemic and guided by operational needs, ARGOS  
8  
9 has been enriched by various data, including contact tracing information. The primary  
10  
11 aim of this article is to present this comprehensive cohort, its characteristics and the  
12  
13 content of the data collected. The secondary aim is to interpret the data according to the  
14  
15 public health measures implemented over time since the cohort profile was influenced  
16  
17 by the varying policies enacted by the Swiss government and the Geneva State.  
18  
19  
20  
21  
22

## 23 Cohort description

### 24 The ARGOS database

25  
26  
27 ARGOS is an ongoing prospective cohort created by the Geneva Directorate of Health  
28  
29 (GDH) and consists of an operational database compiling all SARS-CoV-2 test results  
30  
31 conducted in the Geneva canton. Data are collected and managed using the REDCap  
32  
33 electronic data capture tools(10,11) allowing the GDH to contact positive cases in order  
34  
35 to promote public health measures and coordinate medical follow-up. It is set up as a  
36  
37 collaborative tool between different institutions and medical entities, including the GDH,  
38  
39 Geneva University Hospitals (HUG), and Geneva's main private medical centers. The  
40  
41 latter have restricted access to data regarding their own patients only. The GDH and HUG  
42  
43 are the only users to implement follow-up data in the electronic register. The data is  
44  
45 hosted on HUG's secure servers. The register is administered by a committee of co-  
46  
47 Principal Investigators belonging to the GDH and HUG, with the agreement of the  
48  
49 cantonal ethic committee (CCER protocol 2020-01273). Participants in the database had  
50  
51  
52  
53  
54  
55  
56  
57  
58  
59  
60

1  
2  
3 the opportunity to refuse to participate in the registry, and those who did are excluded  
4 from the analyses presented here and any data sharing. The participation rate for positive  
5 patients is 93.9% (calculated as the ratio between the number of patients who gave their  
6 consent for the reuse of their data and the total number of patients). As recommended by  
7 the World Health Organization, deidentified ARGOS data are made available upon  
8 reasonable request, including a research protocol, using the [form](https://edc.hcuge.ch/surveys/?s=TLT9EHE93C)  
9  
10  
11  
12  
13  
14  
15  
16  
17 <https://edc.hcuge.ch/surveys/?s=TLT9EHE93C>.

### 20 Data collection

21  
22 All Geneva laboratories performing SARS-CoV-2 testing are required to send the results  
23 to the GDH. Swabs are collected from the upper respiratory tract in medical centers,  
24 private practice or during home visits by trained healthcare professionals(12). Between  
25 January 24, 2020 and June 1st, 2021, 655'464 tests for SARS-CoV-2 recorded in the  
26 ARGOS database, 584'512 were performed by real-time reverse transcriptase–  
27 polymerase chain reaction assays and 70'952 by rapid antigen tests. The majority were  
28 performed in the Geneva area and a small number consisted of tests conducted on  
29 Geneva residents in other Swiss Cantons, and declared to the GDH by the Federal  
30 Office of Public Health (FOPH). Importantly, patients reporting COVID-19 symptoms  
31 between March 13 and March 29, 2020, did not get tested due to shortage of testing  
32 materials, unless they were healthcare workers, considered at-risk or hospitalized.  
33  
34 However, symptomatic patients who visited the HUG COVID-19 testing center without  
35 fulfilling testing criteria were entered in the database as “suspected cases”. Some of  
36 these patients later received a test as policy evolved on March 30, 2020. For each  
37 positive or suspect case, a series of surveys is filled using REDCap platform.  
38  
39  
40  
41  
42  
43  
44  
45  
46  
47  
48  
49  
50  
51  
52  
53  
54  
55  
56  
57  
58  
59  
60

1  
2  
3 Depending on the needs, follow-up calls are performed either by a professional nurse, a  
4 medical student or a contact tracer with supervision from a medical doctor. Findings are  
5 documented in the database. 669 patients from the cohort were also called back at 6  
6 week and 7 months to monitor the persistence of symptoms, of which 510 and 410  
7 answered respectively. All SARS-CoV-2 positive patients in Geneva who require  
8 hospitalization at HUG received follow-up calls by the HUG team at the time of  
9 discharge from the hospital. COVID-19 positive patients identified as nursing home  
10 residents or who are hospitalized at the time of diagnosis are not systematically called  
11 since they already receive medical attention and isolation measures are enforced by the  
12 medical staff. During the second wave, which started in late September 2020, the  
13 incidence of SARS-CoV-2 positive patients became so high that the GDH team could  
14 not contact everyone in time. A semi-automatic process was put in place. Positive  
15 patients and their declared contacts received an invitation to an online survey where  
16 they filled basic information. Only then and when the workload allowed it, they received  
17 a phone call from the GDH team to complete the data already provided. At the peak of  
18 the second wave, not all SARS-CoV-2 positive patients could be contacted. Follow-up  
19 calls as well as calls to close contacts were also temporarily abandoned. Finally, the  
20 Geneva Cantonal Population Office are required to declare COVID-19 related deaths,  
21 which are also recorded in ARGOS. Patients or the public were not involved in  
22 research.

### 23 24 25 26 27 28 29 30 31 32 33 34 35 36 37 38 39 40 41 42 43 44 45 46 47 48 49 50 51 52 53 54 55 56 57 58 59 60

### What is being measured?

An overview of collected data is provided in Table 1. The surveys were created by the  
GDH and HUG medical task forces. Within the first 48h of testing, patients with a



1  
2  
3 positive test result for COVID-19 receive a call by a professional nurse or a trained  
4  
5 contact tracer with support from a medical doctor if needed. During this call,  
6  
7 demographic data are collected (13), as well as symptoms (14–17), clinical and  
8  
9 environmental risk factors, and clinical red flags. A special attention is paid to  
10  
11 psychosocial and cultural factors, and resources are provided when needed. The  
12  
13 clinical evaluation is used to identify patients who need immediate emergency care, or  
14  
15 to address them for follow-up care by their general practitioner, by one of Geneva's  
16  
17 medical centers, or by the GDH-HUG team via telemedicine, which is recorded in the  
18  
19 database as well. Patients' declared symptoms are recorded in subsequent surveys.  
20  
21 Patients' self-reported compliance to isolation measures are also recorded. As of April  
22  
23 27, 2020, close contacts of index cases are individually contacted and basic information  
24  
25 is recorded. Demographics, the type of contact they had with the index case, vaccine  
26  
27 information, the presence of COVID-19 symptoms and their compliance to quarantine  
28  
29 measures are also recorded at first call and during follow-up calls. Since July 6, 2020,  
30  
31 the FOPH has established an evolving red list of countries where incidence rate is  
32  
33 considered high or with variant of concern. Travelers who stayed in one of these  
34  
35 countries have to quarantine for 10 days at their arrival in Switzerland. People staying in  
36  
37 Geneva must self-declare upon arrival and fill an online survey containing basic  
38  
39 information which data is also part of ARGOS. Depending of the work load, travelers are  
40  
41 called by contact tracers during their quarantine period. Self-reported compliance to  
42  
43 quarantine measures and the presence of symptoms are recorded during these calls.  
44  
45  
46  
47  
48  
49  
50  
51  
52

## 53 Findings to date

54  
55  
56  
57  
58  
59  
60

1  
2  
3 On June 1<sup>st</sup>, 2021, of all 360'525 patients recorded in the ARGOS database, 65'475 had  
4 at least one positive test result, 294'723 had one or more negative test results and no  
5 positive one, and 327 were suspected COVID-19 cases without a positive test to  
6 confirm the disease. During the same period, 655527 tests were performed, among  
7 which 89.2% were PCR. The positivity, i.e. the ratio between the positive tests and the  
8 total amount of tests, was of 10.7%. Among the positive patients, 4'687 persons did not  
9 allow their data to be used for research and were excluded from analyses. The  
10 remaining number of positive cases available for analysis is 60'788. Of these patients,  
11 37.6% have only a first contact, 10.6% and 8.5% have one and two follow-up call  
12 respectively, and 27.7% of participants have three or more follow-up calls. 15.7% of the  
13 patients were not contacted, mainly during the periods of active pandemic activity when  
14 the GDH team was overworked (see Table 2). The cohort shows a slight female  
15 predominance, with women representing 50.2% to 55.9% of all patients depending on  
16 the defined period (Table 2). More than 60 percent of all recorded patients have no risk  
17 factor for a poor clinical outcome(18). The context of infection recorded for COVID19  
18 positive patients since June 2020 indicates that infection mostly occurs at home, at work  
19 or via the educational system. Around 23.2% of the patient reported having no idea of  
20 their contamination context. Information about 114'690 close contacts of positive  
21 patients has been registered, and 639'153 days of quarantine have been notified. 9'551  
22 close contacts of a positive COVID19 case had a positive test result during their  
23 quarantine. Given that the standard duration of a quarantine is 10 days, we can  
24 estimate that around 15% of the persons in quarantine after being in contact with a  
25  
26  
27  
28  
29  
30  
31  
32  
33  
34  
35  
36  
37  
38  
39  
40  
41  
42  
43  
44  
45  
46  
47  
48  
49  
50  
51  
52  
53  
54  
55  
56  
57  
58  
59  
60

1  
2  
3 positive COVID19 case received a positive test result during their quarantine (see table  
4  
5  
6 2).

7  
8  
9 273'189 days of quarantine concerning 27920 persons were ordered for persons  
10  
11 coming back from a country at risk. These country were in order of importance Spain  
12  
13 (19.4%), France (14.8%), Kosovo (7.6%), United States (7.0%), United Kingdom  
14  
15 (7.0%), Portugal (6.2%) and Brazil (4.2%). 96 persons received a positive test result  
16  
17 during their quarantine, among which 26 came back from Kosovo, 11 from France and  
18  
19 10 from Spain, the total of these infection occurring in 0.35% of the quarantines.  
20  
21

22  
23 To mitigate confounding effects and improve data analysis and interpretation, we  
24  
25 present the data according to four periods (see Figure 1).  
26  
27

#### 28 29 February 26 to April 27, 2020 (first phase) 30 31

32 The first phase starts on February 26, 2020, when the first case was tested positive for  
33  
34 SARS-CoV-2 in the Geneva area. The Swiss authorities implemented lockdown  
35  
36 measures which remained moderate in comparison with many other countries (19). This  
37  
38 first phase ends on April 27, 2020, when some of the measures started to be lifted  
39  
40 following the decreasing incidence of new cases and hospitalizations. During this first  
41  
42 wave, contact tracing was not implemented. Between March 13 and March 29, 2020,  
43  
44 symptomatic individuals did not get tested due to shortage of testing materials, unless  
45  
46 they were healthcare workers, considered at-risk or hospitalized. The percentage of  
47  
48 healthcare professionals among positive cases was significantly higher during this  
49  
50 phase (15.6%) and the percentage of patients declaring no risk factors was smaller  
51  
52  
53  
54  
55  
56  
57  
58  
59  
60

1  
2  
3 (32.4%) when compared to the other phases. The positivity (i.e. the ratio between  
4  
5 positive tests results and the total amount of test performed) was of 23%.  
6  
7

#### 8 9 April 28 to September 24, 2020 (second phase) 10

11 Between May and the end of September, 2020, incidence of SARS-CoV-2 positive  
12 cases remained low. Nearly all restrictions were lifted at the end of June. Nightclubs  
13 were closed again at the end of July after a surge of incidence mostly amongst Geneva  
14 youth, as can be seen by the relative higher incidence of the 20-39 year age category  
15 compared to the others during this period (Figure 2). 14.1% of the positive tests during  
16 this period were stemming from screening campaigns and more than 70% of cases  
17 reported no risk factor. The positivity was only 4.6% during this period.  
18  
19  
20  
21  
22  
23  
24  
25  
26  
27  
28

#### 29 September 24, 2020 to February 28, 2021 (third phase) 30

31 A second wave of SARS-CoV-2 positive cases hit Geneva in late September, 2020, at  
32 the same time as in the neighboring countries. New restrictions were imposed mid-  
33 October but no real lockdown was enacted. The peak lasted about 8 weeks. Due to  
34 political and economic pressure, some restrictions measures were lifted long before  
35 incidence reached low level. The number of SARS-CoV-2 positive cases in Geneva  
36 area remained significant during several months. During February 2021, the B.1.1.7  
37 variant completely replaced SARS-CoV-2 wild type . At the same time, federal and local  
38 policies evolved and testing among symptomatic children over 5 years old was newly  
39 encouraged. Concurrently with these changes, the incidence of the 0-19 year age  
40 population almost doubled to reach those of the older age categories (19–21). The  
41 positivity during this period was 15.9%.  
42  
43  
44  
45  
46  
47  
48  
49  
50  
51  
52  
53  
54  
55  
56  
57  
58  
59  
60

1  
2  
3 As of February 8<sup>th</sup>, 2021, quarantine measures for close contacts were lifted after 7  
4 days if the person tested negative for SARS-CoV-2. Concurrently, the percentage of  
5 close contacts tested positive increased (see table 2). Considering vaccination program,  
6 the first dose of vaccine in Geneva was given to an elderly patient the 28<sup>th</sup> December  
7 2020. At first, only residents over 74 years old and patients with risk factors received  
8 vaccination. The decline of the incidence for people of the corresponding age category  
9 compared to the others can be observed since February 2021 in figure 2.  
10  
11  
12  
13  
14  
15  
16  
17  
18  
19  
20

### 21 March 1<sup>st</sup> to 1<sup>st</sup> June, 2021 (fourth phase)

22 On March 1<sup>st</sup>, access to vaccination continued to broaden. Resident over 65 years were  
23 allowed to be vaccinated since March 17, 2021, followed by the 45-65 year old  
24 residents starting at April 12, 2021. By 19 May, 2021, all Geneva residents over 15  
25 years old were eligible to get vaccinated. The incidence COVID among the 65-79 year  
26 old population started to decline by end of March (figure 2), followed by a rapid decline  
27 of the incidence overall by mid-May. The amount of screening tests increased, as 21%  
28 of the positive tests were performed during a screening campaign. The positivity  
29 decreased to 5.2% during this period.  
30  
31  
32  
33  
34  
35  
36  
37  
38  
39  
40  
41

### 42 Discussion

43  
44 COVID-19 represents a major challenge to each country's healthcare system.  
45  
46 Collaboration between healthcare providers and public health authorities is particularly  
47 important in order to improve both our understanding of the disease and our  
48 response(22–24). The publication of the ARGOS cohort underscores our willingness to  
49 share data for research purposes. Indeed, data from this registry has already been used  
50  
51  
52  
53  
54  
55  
56  
57  
58  
59  
60

1  
2  
3 to investigate symptoms and long COVID (25), infection fatality rate (9), and re-infection  
4 rates (26), as well as viral load kinetics (27). Several projects using these data to  
5  
6 develop more accurate mathematical models to estimate transmission chains are also  
7  
8 ongoing.  
9  
10

11  
12  
13 Furthermore, analysis from the ARGOS database illustrates the impact of various  
14 testing policies on the proportion of risk factors or age groups identified among  
15 confirmed cases. The partition of data analysis and interpretation according to policy  
16 period confirms the variations within each group depending on the period of interest and  
17  
18 could thus guide public health decisions.  
19  
20  
21  
22  
23

## 24 25 26 Strength and limitations 27

28  
29 The state of Geneva accounts for half a million residents and the local Directorate of  
30 Health ordered the recording of all COVID-19 positive cases since the beginning of the  
31 epidemic, according to recommendations from the Federal Office of Public Health. Due  
32 to this policy, the database's main strength consists of its large number of cases,  
33 representative of all diagnosed cases on a regional level primarily serving operational  
34 needs and not scientific purposes, with one main objective: assessing all cases. This  
35 cohort is also multicentric as it includes all tests performed in Geneva's hospitals (both  
36 public and private), private practices and medical centers. The fact that a very large  
37 proportion of all cases are assessed reduces the risk of biased data. Also, as data is  
38 recorded on the day of the call to the patient, recall bias is very low. Finally, the  
39 ARGOS<sup>3</sup> database is characterized by a high number of follow-ups.  
40  
41  
42  
43  
44  
45  
46  
47  
48  
49  
50  
51  
52  
53  
54  
55  
56  
57  
58  
59  
60

1  
2  
3 Despite these strengths, ARGOS has been influenced by the testing policy and the  
4 results must be seen in light of these influences. First, individuals without risk factors for  
5 COVID-19 and those younger than 65 years old are underrepresented in the database  
6 during the testing restriction period. The shapes of the graphics in Figure 1 and 2  
7 confirm the impact of this policy as there is a sudden decrease in number of cases after  
8 March 20, 2020, when restriction started. Other factors could have amplified this  
9 phenomenon such as less symptomatic forms of disease in younger people and  
10 children. Reasons to get tested have also evolved over the first months of the epidemic.  
11 For example, anosmia or ageusia became a testing criteria only in late April. Patients  
12 who presented with these isolated symptoms within the first two months of the epidemic  
13 could thus have been undertested. Seroprevalence study results confirm the  
14 underrepresentation of certain groups and the undertesting of the overall population (8).  
15  
16 Nevertheless, ARGOS has several limitations. First, measurement error due to lack of  
17 detail of some variables can be observed, since efficiency is prioritized over detail-  
18 oriented data collection. For instance, individuals' level of education is not recorded.  
19 Furthermore, fear of sanction could lead to underreporting of compliance to isolation  
20 and quarantine measures. However, compliance is assessed by asking the patient  
21 whether he is able to comply to measures and by offering solutions (e.g. online grocery  
22 shopping, or dog-walking by a third-party) if not. Secondly, misclassification also  
23 certainly occurs as symptoms and risk factors are self-reported. Moreover, recording of  
24 information in ARGOS is performed by a large and evolving team of professionals,  
25 including healthcare workers with various backgrounds, medical students, police  
26 recruits, or contact tracers with no particular medical and health knowledge. Due to the  
27  
28  
29  
30  
31  
32  
33  
34  
35  
36  
37  
38  
39  
40  
41  
42  
43  
44  
45  
46  
47  
48  
49  
50  
51  
52  
53  
54  
55  
56  
57  
58  
59  
60

1  
2  
3 crisis situation, training contents delivered to the GDH team often evolved, leading to a  
4 certain level of heterogeneity of phone interviews and a greater risk for misclassification  
5 of medical information. Thirdly, the patient information gathered is tailored to operational  
6 needs and growing scientific knowledge. For example, anosmia and ageusia were  
7 initially classified as general ENT symptoms, and were later detailed separately as they  
8 were recognized as frequent and specific manifestations of COVID-19 (28). Finally,  
9 during some periods of the pandemic, the GDH team was overworked and could not call  
10 not verify self-reported information for all positive cases. This resulted in missing and  
11 incomplete data.  
12  
13  
14  
15  
16  
17  
18  
19  
20  
21  
22

23  
24 In conclusion, ARGOS is a large, real-world registry of individuals tested for SARS-  
25 Cov2<sup>1</sup>. Unlike many other registries, it involves every tested individual and is not limited  
26 to hospitalized patients, thus providing a precious resource to assess the impact of  
27 public health policies and overall disease burden of COVID-19.  
28  
29  
30  
31  
32  
33

## 34 35 36 Collaboration

37  
38 The publication of the ARGOS cohort underscores our willingness to share data for  
39 research purposes and for optimizing public health measures. Deidentified ARGOS data  
40 are available upon reasonable request, including a research protocol, using the following  
41 form: <https://edc.hcuge.ch/surveys/?s=TLT9EHE93C>.  
42  
43  
44  
45  
46  
47  
48

## 49 50 Further details

## 51 52 53 54 Data sharing statement



1  
2  
3 The deidentified data underlying this article will be shared on reasonable request using  
4 the form (<https://edc.hcuge.ch/surveys/?s=TLT9EHE93C>)  
5  
6  
7

### 8 Ethics approval

9  
10 Research received the agreement of the Cantonal Ethic Committee of Geneva (CCER  
11  
12 protocol 2020-01273).  
13  
14

### 15 Funding

16 ARGOS is supported by Geneva State public funds and the research project SELFISH  
17  
18 financed by the Swiss National Science Foundation LIVES, grant number 51NF40-  
19  
20  
21 160590.  
22  
23  
24

### 25 Acknowledgements

26 We thank all members of the COVID-19 team at the General Directorate of Health, as  
27  
28 well as all healthcare providers and laboratories involved in the management of COVID-  
29  
30  
31 19 patients. We also wish to thank all patients and their contacts who are included in the  
32  
33 ARGOS database.  
34  
35  
36

### 37 Conflicts of interest

38 The authors declare no conflict of interest.  
39  
40  
41

### 42 Authors contribution

43 Each author contributed to this article, based on the criteria of the International Committee  
44  
45 for Medical Journal Editors. Camille Genecand conceptualized, designed the article  
46  
47 format, interpreted the data, and conducted the literature review. Denis Mongin conducted  
48  
49 the data analysis and participated in its formulation and its interpretation in the text. Flora  
50  
51 Koenigler conceptualized and designed the article format, interpreted the data, and  
52  
53 conducted the literature review. Dan Lebowitz participated to the article design and  
54  
55  
56  
57  
58  
59  
60

1  
2  
3 reviewed it. Delphine Courvoisier designed the study's analytic strategy, reviewed the  
4 article, and revisited it critically. Simon Regard, Pierre Chopard, Marwène Grira, Elisabeth  
5 Delaporte, Mayssam Nehme, Olivia Braillard, Dominique Joubert, Idris Guessous,  
6 Jerome Stirnemann and Aglaé Tardin helped acquisition of data and reviewed the article's  
7 content critically.  
8  
9  
10  
11  
12  
13  
14  
15  
16  
17  
18  
19  
20  
21  
22  
23  
24  
25  
26  
27  
28  
29  
30  
31  
32  
33  
34  
35  
36  
37  
38  
39  
40  
41  
42  
43  
44

#### **References:**

1. Cucinotta D, Vanelli M. WHO Declares COVID-19 a Pandemic. *Acta Bio-Medica Atenei Parm.* 2020;91(1):157–160.
2. Coronaviridae Study Group of the International Committee on Taxonomy of Viruses. The species Severe acute respiratory syndrome-related coronavirus: classifying 2019-nCoV and naming it SARS-CoV-2. *Nat. Microbiol.* 2020;5(4):536–544.
3. Dong E, Du H, Gardner L. An interactive web-based dashboard to track COVID-19 in real time. *Lancet Infect. Dis.* 2020;20(5):533–534.

- 1
- 2
- 3
4. Roser M, Ritchie H, Ortiz-Ospina E, et al. Coronavirus Pandemic (COVID-19). *Our World Data* [electronic article]. 2020;(https://ourworldindata.org/coronavirus). (Accessed August 2, 2020)
- 5
- 6
- 7
- 8
- 9
- 10
- 11
- 12
- 13
- 14
- 15
- 16
- 17
- 18
- 19
- 20
- 21
- 22
- 23
- 24
- 25
- 26
- 27
- 28
- 29
- 30
- 31
- 32
- 33
- 34
- 35
- 36
- 37
- 38
- 39
- 40
- 41
- 42
- 43
- 44
- 45
- 46
- 47
- 48
- 49
- 50
- 51
- 52
- 53
- 54
- 55
- 56
- 57
- 58
- 59
- 60
6. DSES. COVID-19 - données complètes depuis le début de la pandémie. *GECH – Répub. Cant. Genève*. 2020;(https://www.ge.ch/document/covid-19-donnees-completes-debut-pandemie). (Accessed August 2, 2020)
7. OFSP. Nouveau coronavirus COVID-19: premier cas confirmé en Suisse. 2020;(https://www.bag.admin.ch/bag/fr/home/das-bag/aktuell/medienmitteilungen.msg-id-78233.html). (Accessed August 2, 2020)
8. Stringhini S, Wisniak A, Piumatti G, et al. Repeated seroprevalence of anti-SARS-CoV-2 IgG antibodies in a population-based sample from Geneva, Switzerland. *medRxiv*. 2020;2020.05.02.20088898.
9. Perez-Saez J, Lauer SA, Kaiser L, et al. Serology-informed estimates of SARS-CoV-2 infection fatality risk in Geneva, Switzerland. *Lancet Infect. Dis*. 2020;
10. Harris PA, Taylor R, Thielke R, et al. Research electronic data capture (REDCap)-- a metadata-driven methodology and workflow process for providing translational research informatics support. *J. Biomed. Inform.* 2009;42(2):377–381.
11. Harris PA, Taylor R, Minor BL, et al. The REDCap consortium: Building an international community of software platform partners. *J. Biomed. Inform.* 2019;95:103208.
12. Marty FM, Chen K, Verrill KA. How to Obtain a Nasopharyngeal Swab Specimen. *N. Engl. J. Med.* 2020;382(22):e76.
13. Guan W, Ni Z, Hu Y, et al. Clinical Characteristics of Coronavirus Disease 2019 in China. *N. Engl. J. Med.* 2020;382(18):1708–1720.
14. Vetter P, Vu DL, L’Huillier AG, et al. Clinical features of covid-19. *BMJ*. 2020;369:m1470.
15. Huang C, Wang Y, Li X, et al. Clinical features of patients infected with 2019 novel coronavirus in Wuhan, China. *Lancet Lond. Engl.* 2020;395(10223):497–506.
16. Giacomelli A, Pezzati L, Conti F, et al. Self-reported Olfactory and Taste Disorders in Patients With Severe Acute Respiratory Coronavirus 2 Infection: A Cross-sectional Study. *Clin. Infect. Dis. Off. Publ. Infect. Dis. Soc. Am.* 2020;71(15):889–890.

- 1  
2  
3 17. Greenhalgh T, Koh GCH, Car J. Covid-19: a remote assessment in primary care. *BMJ*. 2020;368:m1182.  
4  
5
- 6  
7 18. ECDC. Rapid risk assessment: Coronavirus disease 2019 (COVID-19) pandemic:  
8 increased transmission in the EU/EEA and the UK – eighth update. *Eur. Cent. Dis.*  
9 *Prev. Control*. 2020;(https://www.ecdc.europa.eu/en/publications-data/rapid-risk-  
10 assessment-coronavirus-disease-2019-covid-19-pandemic-eighth-update).  
11 (Accessed August 2, 2020)  
12
- 13 19. Davies NG, Abbott S, Barnard RC, et al. Estimated transmissibility and impact of  
14 SARS-CoV-2 lineage B.1.1.7 in England. *Science* [electronic article].  
15 2021;372(6538). (https://science.sciencemag.org/content/372/6538/eabg3055).  
16 (Accessed June 20, 2021)  
17
- 18 20. Volz E, Mishra S, Chand M, et al. Assessing transmissibility of SARS-CoV-2  
19 lineage B.1.1.7 in England. *Nature*. 2021;593(7858):266–269.  
20  
21
- 22 21. Forbes H, Morton CE, Bacon S, et al. Association between living with children and  
23 outcomes from covid-19: OpenSAFELY cohort study of 12 million adults in  
24 England. *BMJ*. 2021;372:n628.  
25
- 26 22. Islam N, Sharp SJ, Chowell G, et al. Physical distancing interventions and  
27 incidence of coronavirus disease 2019: natural experiment in 149 countries. *BMJ*  
28 [electronic article]. 2020;370. (https://www.bmj.com/content/370/bmj.m2743).  
29 (Accessed August 24, 2020)  
30
- 31 23. Koo JR, Cook AR, Park M, et al. Interventions to mitigate early spread of SARS-  
32 CoV-2 in Singapore: a modelling study. *Lancet Infect. Dis*. 2020;20(6):678–688.  
33  
34
- 35 24. Baker MG, Wilson N, Anglemyer A. Successful Elimination of Covid-19  
36 Transmission in New Zealand. *N. Engl. J. Med*. 2020;383(8):e56.  
37  
38
- 39 25. Nehme M, Braillard O, Alcoba G, et al. COVID-19 Symptoms: Longitudinal  
40 Evolution and Persistence in Outpatient Settings. *Ann. Intern. Med*.  
41 2021;174(5):723–725.  
42
- 43 26. Leidi A, Kogler F, Dumont R, et al. Risk of reinfection after seroconversion to  
44 SARS-CoV-2: A population-based propensity-score matched cohort study. *Clin.*  
45 *Infect. Dis. Off. Publ. Infect. Dis. Soc. Am*. 2021;ciab495.  
46
- 47 27. Bellon M, Baggio S, Bausch FJ, et al. SARS-CoV-2 viral load kinetics in  
48 symptomatic children, adolescents and adults. *Clin. Infect. Dis. Off. Publ. Infect.*  
49 *Dis. Soc. Am*. 2021;ciab396.  
50  
51
- 52 28. Lechien JR, Chiesa-Estomba CM, De Siati DR, et al. Olfactory and gustatory  
53 dysfunctions as a clinical presentation of mild-to-moderate forms of the coronavirus  
54 disease (COVID-19): a multicenter European study. *Eur. Arch. Oto-Rhino-Laryngol*.  
55  
56  
57

Off. J. Eur. Fed. Oto-Rhino-Laryngol. Soc. EUFOS Affil. Ger. Soc. Oto-Rhino-Laryngol. - Head Neck Surg. 2020;277(8):2251–2261.

|                                                           |                                                                                                                                                                                                                                                                                                                                            |
|-----------------------------------------------------------|--------------------------------------------------------------------------------------------------------------------------------------------------------------------------------------------------------------------------------------------------------------------------------------------------------------------------------------------|
| <u>Test result</u>                                        | <ul style="list-style-type: none"> <li>– Positive</li> <li>– Negative</li> <li>– COVID-19 suspected, no test performed</li> <li>– COVID-19 suspected, negative test result</li> </ul>                                                                                                                                                      |
| <u>Test type</u>                                          | <ul style="list-style-type: none"> <li>– RT-PCR</li> <li>– Rapid antigen test</li> </ul>                                                                                                                                                                                                                                                   |
| <u>Reason for testing</u>                                 | <ul style="list-style-type: none"> <li>– Acute symptoms consistent with COVID-19</li> <li>– Screening, no symptoms</li> <li>– Screening in the workplace (no symptoms)</li> <li>– Screening based on Swisscovid notification (no symptoms)</li> <li>– Patient transfer between hospitals</li> </ul>                                        |
| <u>Demographics</u>                                       | <ul style="list-style-type: none"> <li>– Date of birth</li> <li>– Gender</li> <li>– Basic professional information</li> <li>– Personal and professional addresses</li> <li>– School information :             <ul style="list-style-type: none"> <li>○ School address</li> <li>○ Name of class and professor</li> </ul> </li> </ul>        |
| <u>Medical risk factors for COVID-19 negative outcome</u> | <ul style="list-style-type: none"> <li>– Cardiovascular disease</li> <li>– Hypertension</li> <li>– Obesity (based of calculated BMI)</li> <li>– Chronic respiratory disease</li> <li>– Chronic kidney disease</li> <li>– Cancer</li> <li>– Immunosuppression</li> <li>– Diabetes</li> <li>– Pregnancy</li> <li>– Smoking habits</li> </ul> |
| <u>Vaccination</u>                                        | <ul style="list-style-type: none"> <li>– Number of doses</li> <li>– Dates of doses</li> </ul>                                                                                                                                                                                                                                              |

|                                                                    |                                                                                                                                                                                                                                                                                                                                                                                                               |
|--------------------------------------------------------------------|---------------------------------------------------------------------------------------------------------------------------------------------------------------------------------------------------------------------------------------------------------------------------------------------------------------------------------------------------------------------------------------------------------------|
| <u>Environmental risk factors</u>                                  | <ul style="list-style-type: none"> <li>– Homelessness</li> <li>– Nursing home resident</li> <li>– Asylum seeker or other migrant living in a collective housing</li> <li>– Living in another type of collective housing</li> <li>– Economic insecurity</li> </ul>                                                                                                                                             |
| <u>Possible context of infection</u>                               | <ul style="list-style-type: none"> <li>– In the family or living in the same household</li> <li>– In the workplace</li> <li>– At school</li> <li>– As a healthcare professional</li> <li>– During a public event</li> <li>– At a private party</li> <li>– In a night club</li> <li>– In a bar/ restaurant</li> <li>– During a spontaneous gathering (including between friends)</li> <li>– No idea</li> </ul> |
| <u>Symptoms</u>                                                    | <ul style="list-style-type: none"> <li>– Cough</li> <li>– Presence of sputum</li> <li>– Dyspnea</li> <li>– Fever (&gt; 38C)</li> <li>– Chills</li> <li>– Headache</li> <li>– Fatigue</li> <li>– Arthralgia and/or myalgia</li> <li>– Sore throat</li> <li>– Rhinorrhea, nasal congestion</li> <li>– Anosmia or ageusia</li> <li>– Gastrointestinal symptoms</li> <li>– Skin rash</li> <li>– None</li> </ul>   |
| <u>Factors likely to adversely influence the course of disease</u> | <ul style="list-style-type: none"> <li>– High anxiety level</li> <li>– Feeling of isolation</li> <li>– Difficulties in daily management</li> </ul>                                                                                                                                                                                                                                                            |
| <u>Red Flags</u>                                                   | <ul style="list-style-type: none"> <li>– New-onset or worsening dyspnea</li> <li>– Fever for more than 5 days, or worsening fever non responding to treatment</li> <li>– Deterioration of the general status</li> <li>– Worsening cough</li> <li>– Hemoptysis</li> <li>– Confusion</li> </ul>                                                                                                                 |

|                                                                                      |                                                                                                                                                                                                                                                                                                                                                                                                                                                                                                                                                                                                                                                                                                                                                                                                                                                                  |
|--------------------------------------------------------------------------------------|------------------------------------------------------------------------------------------------------------------------------------------------------------------------------------------------------------------------------------------------------------------------------------------------------------------------------------------------------------------------------------------------------------------------------------------------------------------------------------------------------------------------------------------------------------------------------------------------------------------------------------------------------------------------------------------------------------------------------------------------------------------------------------------------------------------------------------------------------------------|
|                                                                                      | <ul style="list-style-type: none"> <li>– Gastrointestinal symptoms with dehydration</li> <li>– Moderate to severe chest pain</li> </ul>                                                                                                                                                                                                                                                                                                                                                                                                                                                                                                                                                                                                                                                                                                                          |
| <u>Positive patients' self-reported compliance to recommended isolation measures</u> | <ul style="list-style-type: none"> <li>– Full compliance</li> <li>– Partial compliance</li> <li>– Insufficient compliance</li> </ul>                                                                                                                                                                                                                                                                                                                                                                                                                                                                                                                                                                                                                                                                                                                             |
| <u>Timeline</u>                                                                      | <ul style="list-style-type: none"> <li>– Date of symptom onset</li> <li>– Date of testing</li> </ul>                                                                                                                                                                                                                                                                                                                                                                                                                                                                                                                                                                                                                                                                                                                                                             |
| <u>Death</u>                                                                         | <ul style="list-style-type: none"> <li>– Site (at home, nursing home, hospital)</li> <li>– Date</li> </ul>                                                                                                                                                                                                                                                                                                                                                                                                                                                                                                                                                                                                                                                                                                                                                       |
| <u>Contact tracing</u>                                                               | <ul style="list-style-type: none"> <li>– Number of close contacts per index case</li> <li>– Type of contact between index case and close contact: <ul style="list-style-type: none"> <li>– Living in the same household</li> <li>– Intimate contact</li> <li>– Professional</li> <li>– Healthcare environment</li> <li>– Social interaction</li> <li>– Recreational</li> <li>– Schooling</li> </ul> </li> <li>– Date of last contact between index case and close contact</li> </ul>                                                                                                                                                                                                                                                                                                                                                                             |
| <u>Close contact information</u>                                                     | <ul style="list-style-type: none"> <li>– Demographics: <ul style="list-style-type: none"> <li>○ Date of birth</li> <li>○ Gender</li> <li>○ Personal and professional addresses</li> </ul> </li> <li>– Vaccination information (number of doses, dates)</li> <li>– Environmental risk factors <ul style="list-style-type: none"> <li>○ Homelessness</li> <li>○ Nursing home resident</li> <li>○ Asylum seeker or other migrant living in a collective housing</li> <li>○ Living in another type of collective housing</li> <li>○ Economic insecurity</li> <li>○ Healthcare professional</li> </ul> </li> <li>– Presence of symptoms at first call and follow-up calls</li> <li>– Compliance to quarantine measures at first call and follow-up call</li> <li>– Quarantine period (dates of onset and end)</li> <li>– Tested positive during quarantine</li> </ul> |

|                                                          |                                                                                                                                                                                                                                                                                                                                                                                                                                                                                                                                                                                                                                                                                                    |
|----------------------------------------------------------|----------------------------------------------------------------------------------------------------------------------------------------------------------------------------------------------------------------------------------------------------------------------------------------------------------------------------------------------------------------------------------------------------------------------------------------------------------------------------------------------------------------------------------------------------------------------------------------------------------------------------------------------------------------------------------------------------|
| <p>Quarantine after travelling in a red list country</p> | <ul style="list-style-type: none"> <li>– Number of people in quarantine</li> <li>– Demographics:             <ul style="list-style-type: none"> <li>○ Date of birth</li> <li>○ Gender</li> <li>○ Personal address in Geneva / during stay</li> </ul> </li> <li>– Red list country             <ul style="list-style-type: none"> <li>○ Name</li> <li>○ Date of departure</li> </ul> </li> <li>– Vaccination (number of doses, dates)</li> <li>– Quarantine period (dates of onset and end)</li> <li>– Presence of symptoms at first call and follow-up calls</li> <li>– Compliance to quarantine measures at first call and follow-up call</li> <li>– Tested positive during quarantine</li> </ul> |
|----------------------------------------------------------|----------------------------------------------------------------------------------------------------------------------------------------------------------------------------------------------------------------------------------------------------------------------------------------------------------------------------------------------------------------------------------------------------------------------------------------------------------------------------------------------------------------------------------------------------------------------------------------------------------------------------------------------------------------------------------------------------|

Table 1, Actionable Register of Geneva Out- and inpatients with SARS-CoV-2 (ARGOS) collected data

|                                                   | Overall      | 2020-02-25<br>-> 2020-04-27 | 2020-04-27<br>-> 2020-09-24 | 2020-09-24<br>-> 2021-02-14 | 2021-02-14<br>->2021-06-02 |
|---------------------------------------------------|--------------|-----------------------------|-----------------------------|-----------------------------|----------------------------|
| Number of positive patients                       |              |                             |                             |                             |                            |
| n                                                 | 60788        | 5782                        | 3274                        | 40882                       | 10824                      |
| Living in Geneva                                  | 53344 (88.2) | 4793 (84.4)                 | 2827 (86.5)                 | 35936 (88.3)                | 9775 (90.4)                |
| Number of follow-up per patient recorded in ARGOS |              |                             |                             |                             |                            |
| Not called                                        | 9514 (15.7)  | 1135 (19.6)                 | 108 (3.3)                   | 8128 (19.9)                 | 131 (1.2)                  |
| First contact only                                | 22847 (37.6) | 3402 (58.8)                 | 578 (17.7)                  | 17541 (42.9)                | 1316 (12.2)                |
| 1 Follow-up call                                  | 6427 (10.6)  | 346 (6.0)                   | 735 (22.4)                  | 4387 (10.7)                 | 959 (8.9)                  |
| 2 follow-up calls                                 | 5178 (8.5)   | 152 (2.6)                   | 683 (20.9)                  | 2362 (5.8)                  | 1977 (18.3)                |
| 3 or more follow-up calls                         | 16822 (27.7) | 747 (12.9)                  | 1170 (35.7)                 | 8464 (20.7)                 | 6441 (59.5)                |
| Age                                               |              |                             |                             |                             |                            |
| 0-19                                              | 6997 (11.5)  | 175 (3.0)                   | 364 (11.1)                  | 4052 (9.9)                  | 2406 (22.2)                |
| 20-39                                             | 21080 (34.7) | 1690 (29.2)                 | 1558 (47.7)                 | 14356 (35.1)                | 3473 (32.1)                |



|                                |              |             |             |              |              |
|--------------------------------|--------------|-------------|-------------|--------------|--------------|
| 40-64                          | 23879 (39.3) | 2567 (44.4) | 1101 (33.7) | 16007 (39.2) | 4202 (38.8)  |
| 65-80                          | 5046 (8.3)   | 676 (11.7)  | 138 (4.2)   | 3693 (9.0)   | 539 (5.0)    |
| >80                            | 3750 (6.2)   | 674 (11.7)  | 108 (3.3)   | 2769 (6.8)   | 199 (1.8)    |
| Gender                         |              |             |             |              |              |
| Male                           | 28314 (46.6) | 2549 (44.1) | 1628 (49.8) | 18890 (46.2) | 5238 (48.4)  |
| Female                         | 32433 (53.4) | 3233 (55.9) | 1643 (50.2) | 21972 (53.8) | 5574 (51.5)  |
| Non binary                     | 22 (0.0)     | 0 (0.0)     | 1 (0.0)     | 8 (0.0)      | 12 (0.1)     |
| Comorbidities and risk factors |              |             |             |              |              |
| Cardiovascular disease         | 1835 (3.0)   | 396 (6.8)   | 95 (2.9)    | 1103 (2.7)   | 241 (2.2)    |
| Hypertension                   | 4469 (7.4)   | 600 (10.4)  | 196 (6.0)   | 2968 (7.3)   | 705 (6.5)    |
| Diabetes                       | 1975 (3.2)   | 273 (4.7)   | 95 (2.9)    | 1295 (3.2)   | 312 (2.9)    |
| Chronic respiratory illness    | 2170 (3.6)   | 512 (8.9)   | 83 (2.5)    | 1269 (3.1)   | 306 (2.8)    |
| kidney                         | 229 (0.4)    | N/A         | N/A         | 186 (0.5)    | 43 (0.4)     |
| Cancer                         | 545 (0.9)    | 73 (1.3)    | 28 (0.9)    | 349 (0.9)    | 95 (0.9)     |
| Immunosuppression              | 600 (1.0)    | 192 (3.3)   | 30 (0.9)    | 301 (0.7)    | 77 (0.7)     |
| obesity                        | 1081 (1.8)   | N/A         | N/A         | 778 (1.9)    | 303 (2.8)    |
| Age 65 and older               | 8796 (14.5)  | 1350 (23.3) | 246 (7.5)   | 6462 (15.8)  | 738 (6.8)    |
| No risk factor                 | 36905 (60.8) | 1868 (32.4) | 2523 (77.1) | 24093 (59.0) | 8419 (77.8)  |
| Missing information            | 8698 (14.3)  | 1854 (32.1) | 209 (6.4)   | 6221 (15.2)  | 411 (3.8)    |
| Other potential risks          |              |             |             |              |              |
| Chronic disease                | 787 (1.3)    | 56 (1.0)    | 28 (0.9)    | 550 (1.3)    | 152 (1.4)    |
| smoking                        | 4659 (7.7)   | N/A         | N/A         | 3345 (8.2)   | 1313 (12.1)  |
| pregnancy                      | 533 (0.9)    | 41 (0.7)    | 24 (0.7)    | 352 (0.9)    | 116 (1.1)    |
| Other risk                     | 4284 (7.0)   | 107 (1.9)   | 364 (11.1)  | 2741 (6.7)   | 1072 (9.9)   |
| Self reported symptoms         |              |             |             |              |              |
| Missing information            | 12735 (21.0) | 2632 (45.5) | 264 (8.1)   | 9217 (23.3)  | 604 (5.0)    |
| no symptoms ever declared      | 3893 (6.4)   | 254 (4.4)   | 416 (12.7)  | 1807 (4.6)   | 1413 (11.6)  |
| At least one symptom           | 44159 (72.6) | 2896 (50.1) | 2594 (79.2) | 28516 (72.1) | 10148 (83.4) |
| Possible context of infection  |              |             |             |              |              |
| family                         | 17266 (28.4) | N/A         | 511 (15.6)  | 11861 (29.0) | 4889 (45.2)  |
| work                           | 8535 (14.0)  | N/A         | 304 (9.3)   | 6588 (16.1)  | 1639 (15.1)  |
| school                         | 3302 (5.4)   | N/A         | 0 (0.0)     | 2200 (5.4)   | 1101 (10.2)  |
| Health care worker             | 894 (1.5)    | N/A         | 17 (0.5)    | 808 (2.0)    | 67 (0.6)     |

|                                                            |                   |                   |                   |                   |                   |
|------------------------------------------------------------|-------------------|-------------------|-------------------|-------------------|-------------------|
| Public event                                               | 204 (0.3)         | N/A               | 22 (0.7)          | 138 (0.3)         | 44 (0.4)          |
| private_party                                              | 1372 (2.3)        | N/A               | 184 (5.6)         | 933 (2.3)         | 255 (2.4)         |
| club                                                       | 70 (0.1)          | N/A               | 24 (0.7)          | 41 (0.1)          | 5 (0.0)           |
| restaurant                                                 | 1346 (2.2)        | N/A               | 161 (4.9)         | 1125 (2.8)        | 60 (0.6)          |
| Spontaneous gathering                                      | 2527 (4.2)        | N/A               | 81 (2.5)          | 1718 (4.2)        | 728 (6.7)         |
| No idea                                                    | 14090 (23.2)      | N/A               | 410 (12.5)        | 10451 (25.6)      | 3222 (29.8)       |
| Other                                                      | 4921 (8.1)        | N/A               | 488 (14.9)        | 3574 (8.7)        | 858 (7.9)         |
| Missing information                                        | 16520 (27.2)      | 5775 (100)        | 1356 (41.4)       | 8885 (21.7)       | 486 (4.5)         |
| Profession                                                 |                   |                   |                   |                   |                   |
| health care professional                                   | 4503 (7.4)        | 902 (15.6)        | 175 (5.3)         | 2973 (7.3)        | 452 (4.2)         |
| Environmental risk factor                                  |                   |                   |                   |                   |                   |
| Homelessness                                               | 135 (0.2)         | 15 (0.3)          | 6 (0.2)           | 102 (0.2)         | 12 (0.1)          |
| Nursing home resident                                      | 1895 (3.1)        | 377 (6.5)         | 63 (1.9)          | 1403 (3.4)        | 49 (0.5)          |
| Asylum seeker or other migrant living in a collective home | 267 (0.4)         | 25 (0.4)          | 2 (0.1)           | 172 (0.4)         | 68 (0.6)          |
| Collective home resident (other than migrant)              | 627 (1.0)         | 34 (0.6)          | 31 (0.9)          | 431 (1.1)         | 131 (1.2)         |
| Reason for testing                                         |                   |                   |                   |                   |                   |
| Acute symptoms                                             | 45321 (88.0)      | 5633 (99.9)       | 2693 (85.9)       | 28785 (89.2)      | 8204 (78.8)       |
| Testing                                                    |                   |                   |                   |                   |                   |
| Total number of tests performed                            | 655527            | 28931             | 80342             | 291510            | 254744            |
| PCR                                                        | 584573 (89.2)     | 28879 (99.8)      | 80339 (100.0)     | 263182 (90.3)     | 212173 (83.3)     |
| Number of patient tested                                   | 360525            | 25853             | 71269             | 210598            | 169164            |
| Positivity rate                                            | 9.4               | 21.0              | 4.1               | 14.3              | 4.3               |
| deaths                                                     |                   |                   |                   |                   |                   |
| Deaths number                                              | 747               | 280               | 20                | 421               | 22                |
| Age                                                        | 87.1 [80.2, 91.5] | 86.3 [79.4, 91.3] | 89.2 [85.8, 93.3] | 87.7 [81.4, 91.8] | 83.6 [70.5, 90.3] |
| Gender                                                     | 354 (47.4)        | 130 (46.4)        | 10 (50.0)         | 200 (47.7)        | 11 (45.8)         |
| Contact tracing                                            |                   |                   |                   |                   |                   |

|                                                |          |          |           |          |          |
|------------------------------------------------|----------|----------|-----------|----------|----------|
| Number total of contact                        | 114690   | 118      | 12420     | 77990    | 24162    |
| Number of contact per index patient            | 3 [1, 6] | 0 [0, 0] | 7 [4, 11] | 3 [1, 6] | 3 [2, 5] |
| Quarantine after contact with positive         |          |          |           |          |          |
| Number of days                                 | 639153   | N/A      | 31615     | 445468   | 162003   |
| Number of infection during quarantine          | 9551     | N/A      | 333       | 6009     | 3209     |
| Pourcentage of quarantine leading to infection | 14.94    | N/A      | 10.53     | 13.49    | 19.81    |
| Quarantine after traveling                     |          |          |           |          |          |
| Number of days                                 | 273189   | N/A      | 85490     | 121202   | 66429    |
| Number of infection during quarantine          | 96       | N/A      | 29        | 42       | 25       |
| Pourcentage of quarantine leading to infection | 0.35     | N/A      | 0.34      | 0.35     | 0.38     |

Table 2, ARGOS baseline characteristics of positive patients, Geneva, February 26 ,2020 – June 1st, 2021. Periods are presented by grouping together the first wave of cases, the period between the two waves, the second wave and the following period of sustained epidemic activity, and finally the more recent period following the start of the vaccination campaign.



Epidemic Curve of the cases of Coronavirus Disease 2019 (COVID-19) in Geneva state, February 26 ,2020 – June 1st, 2021. Vertical bars represent the daily cases (based on the date of the test result), solid blue line represents the weekly moving average and the solid black line the cumulative cases.

89x64mm (300 x 300 DPI)

1  
2  
3  
4  
5  
6  
7  
8  
9  
10  
11  
12  
13  
14  
15  
16  
17  
18  
19  
20  
21  
22  
23  
24  
25  
26  
27  
28  
29  
30  
31  
32  
33  
34  
35  
36  
37  
38  
39  
40  
41  
42  
43  
44  
45  
46  
47  
48  
49  
50  
51  
52  
53  
54  
55  
56  
57  
58  
59  
60

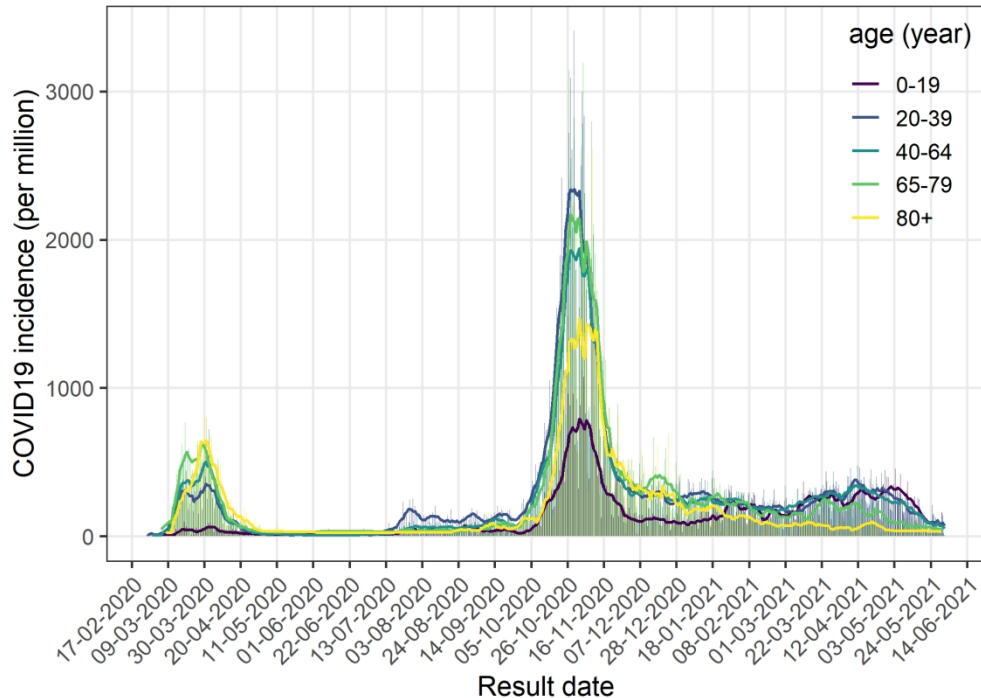

Incidence per age category, Geneva, February 26 ,2020 – June 1st, 2021. Vertical bars represent the daily incidence, solid line represent the weekly moving average.

89x64mm (600 x 600 DPI)

# Reporting checklist for cohort study.

Based on the STROBE cohort guidelines.

## Instructions to authors

Complete this checklist by entering the page numbers from your manuscript where readers will find each of the items listed below.

Your article may not currently address all the items on the checklist. Please modify your text to include the missing information. If you are certain that an item does not apply, please write "n/a" and provide a short explanation.

Upload your completed checklist as an extra file when you submit to a journal.

In your methods section, say that you used the STROBE cohort reporting guidelines, and cite them as:

von Elm E, Altman DG, Egger M, Pocock SJ, Gøtzsche PC, Vandenbroucke JP. The Strengthening of Reporting of Observational Studies in Epidemiology (STROBE) Statement: guidelines for reporting observational studies.

|                           |                     | Reporting Item                                                                                  | Page Number |
|---------------------------|---------------------|-------------------------------------------------------------------------------------------------|-------------|
| <b>Title and abstract</b> |                     |                                                                                                 |             |
| Title                     | <a href="#">#1a</a> | Indicate the study's design with a commonly used term in the title or the abstract              | 1           |
| Abstract                  | <a href="#">#1b</a> | Provide in the abstract an informative and balanced summary of what was done and what was found | 3-4         |
| <b>Introduction</b>       |                     |                                                                                                 |             |
| Background / rationale    | <a href="#">#2</a>  | Explain the scientific background and rationale for the investigation being reported            | 5-6         |
| Objectives                | <a href="#">#3</a>  | State specific objectives, including any prespecified hypotheses                                | 5-6         |
| <b>Methods</b>            |                     |                                                                                                 |             |

|    |                      |                      |                                                                 |            |
|----|----------------------|----------------------|-----------------------------------------------------------------|------------|
| 1  | Study design         | <a href="#">#4</a>   | Present key elements of study design early in the paper         | 6          |
| 2  |                      |                      |                                                                 |            |
| 3  | Setting              | <a href="#">#5</a>   | Describe the setting, locations, and relevant dates, including  | 6-7        |
| 4  |                      |                      | periods of recruitment, exposure, follow-up, and data           |            |
| 5  |                      |                      | collection                                                      |            |
| 6  |                      |                      |                                                                 |            |
| 7  |                      |                      |                                                                 |            |
| 8  | Eligibility criteria | <a href="#">#6a</a>  | Give the eligibility criteria, and the sources and methods of   | 7-8        |
| 9  |                      |                      | selection of participants. Describe methods of follow-up.       |            |
| 10 |                      |                      |                                                                 |            |
| 11 | Eligibility criteria | <a href="#">#6b</a>  | For matched studies, give matching criteria and number of       | n/a        |
| 12 |                      |                      | exposed and unexposed                                           |            |
| 13 |                      |                      |                                                                 |            |
| 14 |                      |                      |                                                                 |            |
| 15 |                      |                      |                                                                 |            |
| 16 | Variables            | <a href="#">#7</a>   | Clearly define all outcomes, exposures, predictors, potential   | 8-9, table |
| 17 |                      |                      | confounders, and effect modifiers. Give diagnostic criteria, if | 1          |
| 18 |                      |                      | applicable                                                      |            |
| 19 |                      |                      |                                                                 |            |
| 20 |                      |                      |                                                                 |            |
| 21 | Data sources /       | <a href="#">#8</a>   | For each variable of interest give sources of data and          | 7-9        |
| 22 | measurement          |                      | details of methods of assessment (measurement). Describe        |            |
| 23 |                      |                      | comparability of assessment methods if there is more than       |            |
| 24 |                      |                      | one group. Give information separately for for exposed and      |            |
| 25 |                      |                      | unexposed groups if applicable.                                 |            |
| 26 |                      |                      |                                                                 |            |
| 27 |                      |                      |                                                                 |            |
| 28 |                      |                      |                                                                 |            |
| 29 |                      |                      |                                                                 |            |
| 30 | Bias                 | <a href="#">#9</a>   | Describe any efforts to address potential sources of bias       | 14-16      |
| 31 |                      |                      |                                                                 |            |
| 32 | Study size           | <a href="#">#10</a>  | Explain how the study size was arrived at                       | 9-10       |
| 33 |                      |                      |                                                                 |            |
| 34 | Quantitative         | <a href="#">#11</a>  | Explain how quantitative variables were handled in the          | n/a        |
| 35 | variables            |                      | analyses. If applicable, describe which groupings were          |            |
| 36 |                      |                      | chosen, and why                                                 |            |
| 37 |                      |                      |                                                                 |            |
| 38 |                      |                      |                                                                 |            |
| 39 |                      |                      |                                                                 |            |
| 40 | Statistical          | <a href="#">#12a</a> | Describe all statistical methods, including those used to       | Along text |
| 41 | methods              |                      | control for confounding                                         |            |
| 42 |                      |                      |                                                                 |            |
| 43 |                      |                      |                                                                 |            |
| 44 | Statistical          | <a href="#">#12b</a> | Describe any methods used to examine subgroups and              | n/a        |
| 45 | methods              |                      | interactions                                                    |            |
| 46 |                      |                      |                                                                 |            |
| 47 |                      |                      |                                                                 |            |
| 48 | Statistical          | <a href="#">#12c</a> | Explain how missing data were addressed                         | 15         |
| 49 | methods              |                      |                                                                 |            |
| 50 |                      |                      |                                                                 |            |
| 51 | Statistical          | <a href="#">#12d</a> | If applicable, explain how loss to follow-up was addressed      | n/a        |
| 52 | methods              |                      |                                                                 |            |
| 53 |                      |                      |                                                                 |            |
| 54 |                      |                      |                                                                 |            |
| 55 | Statistical          | <a href="#">#12e</a> | Describe any sensitivity analyses                               | n/a        |
| 56 | methods              |                      |                                                                 |            |
| 57 |                      |                      |                                                                 |            |
| 58 |                      |                      |                                                                 |            |
| 59 |                      |                      |                                                                 |            |
| 60 |                      |                      |                                                                 |            |

## Results

|    |                   |                      |                                                                       |
|----|-------------------|----------------------|-----------------------------------------------------------------------|
| 1  |                   |                      |                                                                       |
| 2  |                   |                      |                                                                       |
| 3  | Participants      | <a href="#">#13a</a> | Report numbers of individuals at each stage of study—eg 9             |
| 4  |                   |                      |                                                                       |
| 5  |                   |                      | numbers potentially eligible, examined for eligibility,               |
| 6  |                   |                      | confirmed eligible, included in the study, completing follow-         |
| 7  |                   |                      | up, and analysed. Give information separately for for                 |
| 8  |                   |                      | exposed and unexposed groups if applicable.                           |
| 9  |                   |                      |                                                                       |
| 10 |                   |                      |                                                                       |
| 11 | Participants      | <a href="#">#13b</a> | Give reasons for non-participation at each stage 9, table 2           |
| 12 |                   |                      |                                                                       |
| 13 | Participants      | <a href="#">#13c</a> | Consider use of a flow diagram n/a                                    |
| 14 |                   |                      |                                                                       |
| 15 |                   |                      |                                                                       |
| 16 | Descriptive data  | <a href="#">#14a</a> | Give characteristics of study participants (eg demographic, 9-13,     |
| 17 |                   |                      | clinical, social) and information on exposures and potential table 2, |
| 18 |                   |                      | confounders. Give information separately for exposed and figure 2     |
| 19 |                   |                      | unexposed groups if applicable.                                       |
| 20 |                   |                      |                                                                       |
| 21 |                   |                      |                                                                       |
| 22 |                   |                      |                                                                       |
| 23 | Descriptive data  | <a href="#">#14b</a> | Indicate number of participants with missing data for each Table 2    |
| 24 |                   |                      | variable of interest                                                  |
| 25 |                   |                      |                                                                       |
| 26 |                   |                      |                                                                       |
| 27 | Descriptive data  | <a href="#">#14c</a> | Summarise follow-up time (eg, average and total amount) 9-13,         |
| 28 |                   |                      | figure 1                                                              |
| 29 |                   |                      |                                                                       |
| 30 |                   |                      |                                                                       |
| 31 | Outcome data      | <a href="#">#15</a>  | Report numbers of outcome events or summary measures 9-13             |
| 32 |                   |                      | over time. Give information separately for exposed and                |
| 33 |                   |                      | unexposed groups if applicable.                                       |
| 34 |                   |                      |                                                                       |
| 35 |                   |                      |                                                                       |
| 36 | Main results      | <a href="#">#16a</a> | Give unadjusted estimates and, if applicable, confounder- 9-13,       |
| 37 |                   |                      | adjusted estimates and their precision (eg, 95% confidence table 2    |
| 38 |                   |                      | interval). Make clear which confounders were adjusted for             |
| 39 |                   |                      | and why they were included                                            |
| 40 |                   |                      |                                                                       |
| 41 |                   |                      |                                                                       |
| 42 |                   |                      |                                                                       |
| 43 | Main results      | <a href="#">#16b</a> | Report category boundaries when continuous variables n/a              |
| 44 |                   |                      | were categorized                                                      |
| 45 |                   |                      |                                                                       |
| 46 |                   |                      |                                                                       |
| 47 | Main results      | <a href="#">#16c</a> | If relevant, consider translating estimates of relative risk into n/a |
| 48 |                   |                      | absolute risk for a meaningful time period                            |
| 49 |                   |                      |                                                                       |
| 50 |                   |                      |                                                                       |
| 51 | Other analyses    | <a href="#">#17</a>  | Report other analyses done—e.g., analyses of subgroups n/a            |
| 52 |                   |                      | and interactions, and sensitivity analyses                            |
| 53 |                   |                      |                                                                       |
| 54 |                   |                      |                                                                       |
| 55 | <b>Discussion</b> |                      |                                                                       |
| 56 |                   |                      |                                                                       |
| 57 | Key results       | <a href="#">#18</a>  | Summarise key results with reference to study objectives 13-14        |
| 58 |                   |                      |                                                                       |
| 59 |                   |                      |                                                                       |
| 60 |                   |                      |                                                                       |



|    |                    |                     |                                                                 |       |
|----|--------------------|---------------------|-----------------------------------------------------------------|-------|
| 1  | Limitations        | <a href="#">#19</a> | Discuss limitations of the study, taking into account sources   | 14-15 |
| 2  |                    |                     | of potential bias or imprecision. Discuss both direction and    |       |
| 3  |                    |                     | magnitude of any potential bias.                                |       |
| 4  |                    |                     |                                                                 |       |
| 5  |                    |                     |                                                                 |       |
| 6  | Interpretation     | <a href="#">#20</a> | Give a cautious overall interpretation considering objectives,  | 15-16 |
| 7  |                    |                     | limitations, multiplicity of analyses, results from similar     |       |
| 8  |                    |                     | studies, and other relevant evidence.                           |       |
| 9  |                    |                     |                                                                 |       |
| 10 |                    |                     |                                                                 |       |
| 11 | Generalisability   | <a href="#">#21</a> | Discuss the generalisability (external validity) of the study   | 15-16 |
| 12 |                    |                     | results                                                         |       |
| 13 |                    |                     |                                                                 |       |
| 14 |                    |                     |                                                                 |       |
| 15 | <b>Other</b>       |                     |                                                                 |       |
| 16 | <b>Information</b> |                     |                                                                 |       |
| 17 |                    |                     |                                                                 |       |
| 18 |                    |                     |                                                                 |       |
| 19 | Funding            | <a href="#">#22</a> | Give the source of funding and the role of the funders for      | 16    |
| 20 |                    |                     | the present study and, if applicable, for the original study on |       |
| 21 |                    |                     | which the present article is based                              |       |
| 22 |                    |                     |                                                                 |       |
| 23 |                    |                     |                                                                 |       |

#### Notes:

- The STROBE checklist is distributed under the terms of the Creative Commons Attribution License CC-BY. This checklist was completed on 23. June 2021 using <https://www.goodreports.org/>, a tool made by the [EQUATOR Network](#) in collaboration with [Penelope.ai](#)
